# Supplementary material for: Mechanically stimulated ATP release from murine bone cells is regulated by a balance of injury and repair
Source: eLife. 2018 Oct 16;7:e37812. doi: 10.7554/eLife.37812 (PMC6205812; doi:10.7554/eLife.37812)
Supplement: Figure 1—source data 1. [file elife-37812-fig1-data1.xlsx]

## Sheet: Sheet1
															Panel D																	Panel E															Panel F
																	CB-OB							C2-OB									Nif														c	Control
																																	Rel. Time (s)	Control	std	sem	Nif	std	sem		Rel. Time (s)	VSCC (% control)					Rel. Time (s)	Control	std
																	Control	100uM Suramin	100uM PPADS	ctrl (nif control)	nif			Control	Suramin	PPADS	Ctrl (nif control)	Nif					0	0.782744	0.0427399	0.0142466	0.823589	0.0971558	0.0323853		0	0					0	0.755548	0.101824
																	8.90839	2.03622	4.92642	11.2119	8.69508			1.33941	1.74199	0.654562	3.9882	2.56493					0.6548	0.782782	0.0428415	0.0142805	0.822537	0.0938034	0.0312678		0.655794	0					0.625191	0.749959	0.101533
																	7.32701	9.5193	3.99289	19.6352	8.95574			1.58747	1.34196	0.391296	3.51684	3.34283					1.10452	0.783192	0.0445273	0.0148424	0.824999	0.0940133	0.0313378		1.10555	0					1.05523	0.747123	0.101654
																	14.3064	13.2011	6.88004	10.1468	7.15249			1.66377	1.46773	0.702036	3.5764	0.602873					1.75886	0.781837	0.0417043	0.0139014	0.821394	0.0929729	0.030991		1.76067	0					1.68008	0.739324	0.0995667
																	7.29449	6.4292	4.74015	13.5667	9.62805			2.51397	0.546391	0.719524	3.14447	0.108435					2.41028	0.782293	0.0437094	0.0145698	0.825377	0.0909035	0.0303012		2.41262	0					2.30292	0.738427	0.0990772
																	6.43949	11.5001	5	9.62085	8.88391			1.76452	0.499664	0.560007	3.66764	3.48032					2.8595	0.78215	0.042168	0.014056	0.825688	0.0948807	0.0316269		2.86157	0					2.7333	0.732596	0.0974899
																	9.8719	9.17994	4.0828	15.1283	7.134			2.11386	1.63584	0.786152	3.29862	3.09585					3.51403	0.781023	0.0460013	0.0153338	0.824837	0.0933231	0.0311077		3.51617	0					3.35797	0.728756	0.0990784
																	10.4394	9.09507		11.8204	9.5754			1.27924	1.29247	0.923799	3.85253	3.8764					4.16642	0.780121	0.0434204	0.0144735	0.828409	0.0946116	0.0315372		4.16904	0					3.98034	0.726333	0.0974254
																	4.8534							2.12633	1.69434	1.06976	3.55821	2.49763					4.61569	0.780607	0.0454751	0.0151584	0.830463	0.0946337	0.0315446		4.61764	0					4.41032	0.721966	0.0967817
																	5.96945							1.33529	1.34364	0.936301	3.93452	1.1833					5.27143	0.78156	0.0446382	0.0148794	0.8294	0.0961197	0.0320399		5.27249	0					5.03602	0.716858	0.0976211
																	6.21638								1.31824	1.19827		3.2416					5.92355	0.782612	0.0444117	0.0148039	0.827928	0.0944803	0.0314934		5.92416	0					5.65806	0.71077	0.0929105
																	12.2064								1.43561	0.874961							6.37258	0.779412	0.0459683	0.0153228	0.828738	0.0935312	0.0311771		6.37351	0					6.08727	0.707825	0.0961825
																	9.14583								1.42109	1.00547							7.02676	0.781038	0.0487801	0.01626	0.832557	0.0959015	0.0319672		7.02774	0					6.71157	1.34787	0.366877
																	18.9545																7.67814	1.28297	0.270736	0.0902453	1.16664	0.391756	0.130585		7.67963	0					7.32845	1.94315	0.405121
																	7.77918																8.12662	2.14846	0.577995	0.192665	1.79569	0.657325	0.219108		8.12962	0					7.7583	2.26594	0.485442
																	6.49709																8.78095	2.81369	0.856044	0.285348	2.37061	0.791885	0.263962		8.78389	0					8.38263	2.42512	0.49742
																																	9.43302	3.3748	1.03918	0.346394	2.87107	0.963557	0.321186		9.43712	0					9.00578	2.46776	0.466232
																																	9.88152	3.53459	0.718587	0.239529	3.21547	1.25548	0.418495		9.88558	0					9.43122	2.49814	0.48423
																																	10.5358	3.86406	0.571643	0.190548	3.34248	1.0883	0.362767		10.5399	0					10.0557	2.48121	0.476968
																																	11.1883	4.01547	0.544414	0.181471	3.48043	1.12354	0.374513		11.1922	0					10.6728	2.46561	0.461086
																	Control	100uM Suramin	100uM PPADS	ctrl (nif control)	nif			Control	Suramin	PPADS	Ctrl (nif control)	Nif					11.6386	4.13592	0.49666	0.165553	3.53981	1.15498	0.384993		11.6425	0					11.1024	2.44865	0.454997
																mean	9.08062	8.70871	4.93705	13.0186	8.57495			1.7471	1.31158	0.818511	3.61527	2.39942					12.2931	4.18316	0.549681	0.183227	3.64714	1.21821	0.40607		12.2979	0.0048585					11.727	2.40398	0.440562
																std	3.72674	3.62216	1.043	3.4886	1.03799			0.426299	0.397235	0.22785	0.282048	1.30921					12.9444	4.20844	0.510662	0.170221	3.68582	1.24403	0.414675		12.9498	0.0128978					12.3492	2.36894	0.429764
																error	41.0406	41.5924	21.126	26.7971	12.1049			24.4005	30.2867	27.8371	7.80158	54.5637					13.3936	4.3311	0.647065	0.215688	3.72876	1.26813	0.422711		13.3996	0.0153981					12.7793	2.3571	0.433407
																n	15	7	6	7	7			9	12	12	9	10					14.0482	4.31688	0.547097	0.182366	3.74768	1.31609	0.438697		14.0548	0.0251502					13.4037	2.33628	0.420474
																sem	0.962239	1.36905	0.425803	1.31857	0.392323			0.1421	0.114672	0.0657746	0.0940161	0.414009					14.7004	4.2762	0.515689	0.171896	3.75318	1.31895	0.439649		14.7054	0.0258549					14.0263	2.30756	0.406295
																																	15.1496	4.28679	0.490953	0.163651	3.7253	1.28717	0.429056		15.1495	0.0322864					14.4554	2.28906	0.398809
																																	15.8032	4.3143	0.527973	0.175991	3.77927	1.33375	0.444584		15.8047	0.0440691					15.0797	2.27274	0.386731
																	Control	suramin	ppads	nif				Control	Suramin	PPADS	Nif						16.4548	4.33651	0.535532	0.178511	3.75405	1.31138	0.437128		16.4552	0.046102					15.701	2.2574	0.381238
																mean (norm)	1	0.959043	0.543691	0.658671				1	0.750721	0.468498	0.66369						16.8995	4.44972	0.695939	0.23198	3.77092	1.32843	0.442808		16.9057	0.0426428					16.1264	2.23818	0.372494
																std	0.410406	0.398889	0.11486	0.0797313				0.244005	0.227369	0.130417	0.362134						17.5539	4.34768	0.561172	0.187057	3.75601	1.31375	0.437917		17.56	0.0454489					16.7518	2.21112	0.369317
																error	41.0406	41.5924	21.126	12.1049				24.4005	30.2867	27.8371	54.5637						18.2009	4.33875	0.517079	0.17236	3.73453	1.28557	0.428524		18.207	0.0503773					17.373	2.18776	0.364942
																n	15	7	6	7				9	12	12	10						18.6506	4.30975	0.53619	0.17873	3.73479	1.32989	0.443297		18.6576	0.0584366					17.8033	2.1607	0.346015
																sem	0.105966	0.150766	0.0468914	0.0301356				0.1421	0.0656357	0.037648	0.114517						19.3052	4.40024	0.60137	0.200457	3.72188	1.28293	0.427645		19.3119	0.0722233					18.3032	2.1429	0.341012
																p		0.827818	0.000957634	0.0072181					0.0292393	8.49161e-05	0.0169705						19.9529	4.36291	0.590666	0.196889	3.71979	1.32115	0.440384		19.9641	0.0651767					18.8032	2.12344	0.334103
																																	20.4015	4.33568	0.528488	0.176163	3.68951	1.2834	0.4278		20.4136	0.0648423					19.3032	2.10475	0.339886
																																	21.0558	4.50372	0.784636	0.261545	3.73656	1.35603	0.452011		21.068	0.0616069					19.8032	2.07996	0.332018
																Anova: Single Factor								Anova: Single Factor									21.5066	4.3944	0.68821	0.229403	3.6721	1.31642	0.438807		21.7205	0.0811007					20.3032	2.06776	0.328012
																																	22.0065	4.44358	0.699435	0.233145	3.66767	1.31982	0.439941		22.1695	0.077109					20.8032	2.04351	0.317912
																SUMMARY								SUMMARY									22.5065	4.31097	0.53217	0.17739	3.64983	1.30487	0.434956		22.8241	0.0767855					21.3042	2.02431	0.315111
																Groups	Count	Sum	Average	Variance				Groups	Count	Sum	Average	Variance					23.0065	4.32174	0.561113	0.187038	3.59389	1.23973	0.413244		23.4765	0.106167					21.8032	2.00887	0.317484
																Control	15	136.209	9.08062	13.8886				Control	9	15.7239	1.7471	0.181731					23.5065	4.30759	0.607725	0.202575	3.62213	1.30885	0.436284		23.9266	0.0966029					22.3042	2.00159	0.315084
																100uM Suramin	7	60.9609	8.70871	13.1201				Suramin	12	15.739	1.31158	0.157795					24.0065	4.27454	0.531779	0.17726	3.59518	1.25914	0.419713		24.5811	0.096798					22.8042	1.97778	0.301436
																100uM PPADS	6	29.6223	4.93705	1.08785				PPADS	12	9.82214	0.818511	0.0519156					24.5065	4.36699	0.709068	0.236356	3.56677	1.26866	0.422887		25.2335	0.0876838					23.3032	1.94917	0.300255
																																	25.0065	4.31009	0.613361	0.204454	3.53665	1.25162	0.417206		25.6826	0.0940328					23.7982	1.94378	0.29645
																																	25.5065	4.23162	0.546893	0.182298	3.51287	1.25118	0.41706		26.3371	0.0985667					24.3032	1.93371	0.294135
																ANOVA								ANOVA									26.0065	4.63914	0.952757	0.317586	3.50234	1.24237	0.414123		26.9894	0.0894227					24.8042	1.91031	0.290295
																Source of Variation	SS	df	MS	F	P-value	F crit		Source of Variation	SS	df	MS	F	P-value	F crit			26.5065	4.2872	0.642689	0.21423	3.46605	1.20879	0.402931		27.4401	0.111204					25.3042	1.89577	0.282408
																Between Groups	77.0434	2	38.5217	3.45673	0.0472692	3.38519		Between Groups	4.50359	2	2.2518	17.9632	7.42882e-06	3.31583			27.0065	4.23419	0.54574	0.181913	3.47583	1.25588	0.418628		28.0939	0.109113					25.8042	1.88387	0.28084
																Within Groups	278.6	25	11.144					Within Groups	3.76067	30	0.125356						27.5066	4.26174	0.646131	0.215377	3.43176	1.22187	0.407289		28.7466	0.101958					26.3032	1.87642	0.277666
																																	28.0065	4.18589	0.535203	0.178401	3.38172	1.16057	0.386856		29.1965	0.18632					26.8032	1.8526	0.272606
																Total	355.643	27						Total	8.26426	32							28.5065	4.31841	0.748428	0.249476	3.41736	1.22824	0.409414		29.8509	0.115497					27.3032	1.84383	0.268153
																																	29.0065	4.21474	0.612317	0.204106	3.40076	1.20626	0.402088		30.5037	0.112892					27.8032	1.82387	0.267802
																																	29.5065	4.13881	0.520267	0.173422	3.33798	1.16674	0.388912		30.9526	0.132103					28.2982	1.8126	0.26218
																Anova: Single Factor								Anova: Single Factor									30.0066	4.57767	1.52763	0.509212	3.34039	1.15541	0.385136		31.6074	0.103517					28.8032	1.80003	0.262754
																																	30.5015	4.17093	0.638579	0.21286	3.28867	1.14607	0.382023		32.0566	0.150368					29.3032	1.78329	0.25164
																SUMMARY								SUMMARY									31.0065	4.25069	0.675873	0.225291	3.23572	1.08824	0.362747		32.5565	0.129859					29.8032	1.76614	0.250067
																Groups	Count	Sum	Average	Variance				Groups	Count	Sum	Average	Variance					31.5015	4.31922	0.916459	0.305486	3.23391	1.08404	0.361348		33.0565	0.115551					30.3032	1.75775	0.255123
																ctrl (nif control)	7	91.13	13.0186	12.1703				Ctrl (nif control)	9	32.5374	3.61527	0.0795512					32.0065	4.10363	0.497555	0.165852	3.21676	1.07833	0.359442		33.5566	0.215105					30.8032	1.74632	0.252895
																nif	7	60.0247	8.57495	1.07742				Nif	10	23.9942	2.39942	1.71403					32.5065	4.08675	0.52545	0.17515	3.20811	1.05769	0.352562		34.0565	0.130256					31.3032	1.73266	0.249522
																																	33.0066	4.09697	0.483055	0.161018	3.20474	1.1127	0.3709		34.5565	0.159124					31.8032	1.7101	0.250108
																																	33.5066	4.04498	0.569605	0.189868	3.12141	1.02566	0.341886		35.0525	0.183189					32.3032	1.69512	0.25127
																ANOVA								ANOVA									34.0065	4.06364	0.6159	0.2053	3.10413	1.04206	0.347352		35.5566	0.148692					32.8042	1.68306	0.247573
																Source of Variation	SS	df	MS	F	P-value	F crit		Source of Variation	SS	df	MS	F	P-value	F crit			34.5065	4.20887	0.817729	0.272576	3.09428	1.04061	0.346868		36.0566	0.143785					33.3032	1.67041	0.252914
																Between Groups	69.1101	1	69.1101	10.4335	0.0072181	4.74723		Between Groups	7.00247	1	7.00247	7.41107	0.0144833	4.45132			35.0065	4.04032	0.61858	0.206193	3.07404	1.05029	0.350097		36.5565	0.159148					33.8042	1.66054	0.248446
																Within Groups	79.4865	12	6.62387					Within Groups	16.0627	17	0.944865						35.5065	4.16401	0.777185	0.259062	3.06317	1.01789	0.339298		37.0565	0.13969					34.3042	1.65175	0.245831
																																	36.0065	4.20252	0.815658	0.271886	3.00983	0.994109	0.33137		37.5565	0.15357					34.8032	1.63187	0.249179
																Total	148.597	13						Total	23.0652	18							36.5065	3.97743	0.532133	0.177378	2.99959	1.0086	0.336198		38.0566	0.195022					35.3032	1.61276	0.240292
																																	37.0065	4.04487	0.661173	0.220391	2.97407	0.987663	0.329221		38.5566	0.159483					35.8042	1.60818	0.24348
																																	37.5065	3.95998	0.54485	0.181617	2.94205	0.975358	0.325119		39.0565	0.200765					36.3032	1.59653	0.242596
																																	38.0065	3.98878	0.738616	0.246205	2.98404	1.03197	0.343991		39.5575	0.20073					36.8042	1.58113	0.239115
																																	38.5065	3.93321	0.591156	0.197052	2.87212	0.96743	0.322477		40.0565	0.183654					37.3032	1.56521	0.237038
																																	39.0065	3.90139	0.522433	0.174144	2.84859	0.954778	0.318259		40.5576	0.20233					37.8032	1.55649	0.239997
																																	39.5065	3.91119	0.517707	0.172569	2.87414	0.97251	0.32417		41.0565	0.180036					38.3032	1.54042	0.231583
																																	40.0065	4.02645	0.730841	0.243614	2.81376	0.943615	0.314538		41.5565	0.194543					38.8032	1.52936	0.237738
																																	40.5065	3.88104	0.464705	0.154902	2.78537	0.914813	0.304938		42.0515	0.194257					39.3032	1.51842	0.232925
																																	41.0065	3.89638	0.585489	0.195163	2.77393	0.938442	0.312814		42.5566	0.194008					39.8032	1.51378	0.235441
																																	41.5065	3.83184	0.500784	0.166928	2.79627	0.958839	0.319613		43.0565	0.19131					40.3042	1.49599	0.229134
																																	42.0065	3.83393	0.568436	0.189479	2.72933	0.917848	0.305949		43.5565	0.234413					40.8032	1.48865	0.23041
																																	42.5065	3.89289	0.589904	0.196635	2.70591	0.912814	0.304271		44.0566	0.201891					41.3032	1.47719	0.227107
																																	43.0065	3.92098	0.69701	0.232337	2.69755	0.898838	0.299613		44.5566	0.205676					41.8042	1.46466	0.22504
																																	43.5065	3.81843	0.52456	0.174853	2.66673	0.907194	0.302398		45.0565	0.204128					42.3032	1.46317	0.218898
																																	44.0065	3.91301	0.701144	0.233715	2.64589	0.895489	0.298496		45.5566	0.204796					42.8042	1.44718	0.221557
																																	44.5065	3.76782	0.520805	0.173602	2.61168	0.873002	0.291001		46.0566	0.239299					43.3042	1.44025	0.219451
																																	45.0065	3.77336	0.480908	0.160303	2.58787	0.864266	0.288089		46.5565	0.25482					43.8032	1.4281	0.219764
																																	45.5065	3.77878	0.549951	0.183317	2.56354	0.857077	0.285692		47.0565	0.235065					44.3042	1.42058	0.219698
																																	46.0066	3.84994	0.638426	0.212809	2.54416	0.854758	0.284919		47.5565	0.260909					44.8042	1.40823	0.210582
																																	46.5065	3.73633	0.484811	0.161604	2.51336	0.825862	0.275287		48.0575	0.24033					45.2982	1.39478	0.205059
																																	47.0065	3.75631	0.629479	0.209826	2.49309	0.818925	0.272975		48.5566	0.246974					45.8042	1.39126	0.212395
																																	47.5067	3.71492	0.484839	0.161613	2.47733	0.812406	0.270802		49.0576	0.256718					46.3032	1.38457	0.205679
																																	48.0065	3.81961	0.734753	0.244918	2.46454	0.827322	0.275774		49.5575	0.271454					46.8032	1.37207	0.204547
																																	48.5066	3.66807	0.488411	0.162804	2.43781	0.809607	0.269869		50.0515	0.260404					47.3042	1.36594	0.196944
																																	49.0065	3.77283	0.589094	0.196365	2.43451	0.811213	0.270404		50.5565	0.259241					47.8032	1.35652	0.195147
																																	49.5065	3.64505	0.476481	0.158827	2.40702	0.794895	0.264965		51.0565	0.2668					48.3032	1.35232	0.196333
																																	50.0065	3.73404	0.47943	0.15981	2.3563	0.777563	0.259188		51.5565	0.304704					48.8032	1.33928	0.188945
																																	50.5065	3.82855	0.839475	0.279825	2.37102	0.77369	0.257897		52.0576	0.252644					49.2982	1.34137	0.194606
																																	51.0066	3.64244	0.519206	0.173069	2.35541	0.782694	0.260898		52.5565	0.299592					49.8032	1.33085	0.187165
																																	51.5065	3.60895	0.566738	0.188913	2.3323	0.756981	0.252327		53.0565	0.274834					50.3032	1.32493	0.181395
																																	52.0065	3.5883	0.476955	0.158985	2.32038	0.779108	0.259703		53.5565	0.303545					50.8032	1.31838	0.187542
																																	52.5065	3.57998	0.46727	0.155757	2.28657	0.752163	0.250721		54.0565	0.34288					51.3032	1.31207	0.18234
																																	53.0066	3.57866	0.461216	0.153739	2.28048	0.752827	0.250942		54.5565	0.292787					51.8032	1.30254	0.176979
																																	53.5065	3.51118	0.415967	0.138656	2.25059	0.74976	0.24992		55.0565	0.298245					52.3032	1.297	0.176528
																																	54.0065	3.59692	0.525608	0.175203	2.23469	0.739614	0.246538		55.5565	0.291792					52.7982	1.28994	0.178092
																																	54.5065	3.54155	0.457938	0.152646	2.21708	0.744579	0.248193		56.0565	0.299071					53.2982	1.28436	0.172887
																																	55.0065	3.52078	0.492907	0.164302	2.18997	0.728398	0.242799		56.5565	0.309779					53.8042	1.27715	0.174815
																																	55.5065	3.53008	0.486768	0.162256	2.21273	0.755759	0.25192		57.0565	0.280488					54.2982	1.27061	0.167232
																																	56.0065	3.69862	0.710091	0.236697	2.18	0.75111	0.25037		57.5565	0.302319					54.8042	1.26135	0.166988
																																	56.5065	3.50608	0.498554	0.166185	2.16	0.733434	0.244478		58.0565	0.310095					55.3042	1.25689	0.161225
																																	57.0066	3.48376	0.432472	0.144157	2.12323	0.71138	0.237127		58.5565	0.319421					55.7992	1.25292	0.163418
																																	57.5066	3.5204	0.476905	0.158968	2.11745	0.71575	0.238583		59.0566	0.320904					56.3042	1.24711	0.160319
																																	58.0066	3.47	0.448412	0.149471	2.10007	0.706252	0.235417		59.5565	0.379258					56.8042	1.24198	0.157793
																																	58.5066	3.45823	0.391429	0.130476	2.08935	0.702419	0.23414		60.0565	0.328229					57.3032	1.23564	0.154712
																																	59.0065	3.45851	0.464677	0.154892	2.07309	0.694908	0.231636		60.5566	0.326964					57.8032	1.22819	0.154661
																																	59.5065	3.44521	0.471897	0.157299	2.0612	0.698077	0.232692		61.0565	0.341508					58.3032	1.2257	0.149695
																																	60.0065	3.43498	0.40147	0.133823	2.02842	0.689325	0.229775		61.5565	0.339716					58.8032	1.21918	0.150855
																																	60.5065	3.42805	0.415119	0.138373	2.03535	0.704563	0.234854		62.0566	0.333676					59.3032	1.21345	0.148998
																																	61.0065	3.49515	0.442821	0.147607	1.99906	0.669593	0.223198		62.5525	0.341198					59.8032	1.20638	0.144322
																																	61.5015	3.4946	0.579134	0.193045	1.99914	0.679486	0.226495		63.0565	0.336715					60.3032	1.19794	0.145624
																																	62.0066	3.36074	0.347447	0.115816	2.00384	0.684607	0.228202		63.5566	0.344801					60.8032	1.19667	0.14707
																																	62.5065	3.38695	0.438851	0.146284	1.97688	0.67894	0.226313		64.0565	0.349918					61.3032	1.1918	0.142217
																																	63.0015	3.40605	0.505431	0.168477	1.97283	0.668816	0.222939		64.5515	0.368645					61.8032	1.1874	0.143405
																																	63.5065	3.41458	0.494477	0.164826	1.96743	0.676912	0.225637		65.0565	0.368757					62.3032	1.17867	0.140834
																																	64.0066	3.36139	0.422796	0.140932	1.95662	0.655191	0.218397		65.5565	0.339385					62.8042	1.17656	0.139067
																																	64.5065	3.40058	0.431704	0.143901	1.93533	0.652079	0.21736		66.0565	0.350223					63.3032	1.1768	0.135371
																																	65.0066	3.34618	0.447693	0.149231	1.94569	0.661541	0.220514		66.5565	0.358327					63.8032	1.16855	0.132254
																																	65.5065	3.34197	0.419593	0.139864	1.9177	0.648489	0.216163		67.0565	0.370762					64.3032	1.16287	0.13079
																																	66.0065	3.36703	0.408884	0.136295	1.9251	0.650473	0.216824		67.5565	0.35004					64.8042	1.16024	0.129747
																																	66.5065	3.32032	0.462919	0.154306	1.90487	0.637197	0.212399		68.0565	0.373963					65.3032	1.15254	0.128512
																																	67.0066	3.451	0.454131	0.151377	1.89573	0.635015	0.211672		68.5566	0.347857					65.8042	1.15003	0.127535
																																	67.5065	3.38494	0.53704	0.179013	1.89738	0.639084	0.213028		69.0565	0.353					66.3043	1.1453	0.128848
																																	68.0065	3.26618	0.425276	0.141759	1.88385	0.632488	0.210829		69.5565	0.378242					66.8042	1.13896	0.124098
																																	68.5065	3.31266	0.444768	0.148256	1.88404	0.632096	0.210699		70.0575	0.358933					67.3042	1.13475	0.121769
																																	69.0065	3.25193	0.361146	0.120382	1.87005	0.620258	0.206753		70.5566	0.410674					67.8042	1.13561	0.122405
																																	69.5066	3.28817	0.391201	0.1304	1.87519	0.621619	0.207206		71.0565	0.38432					68.3032	1.12799	0.120915
																																	70.0025	3.17958	0.363334	0.121111	1.86485	0.626965	0.208988		71.5566	0.363724					68.8032	1.12654	0.12321
																																	70.5066	3.2494	0.493401	0.164467	1.85742	0.625495	0.208498		72.0576	0.372584					69.3032	1.12073	0.118779
																																	71.0065	3.20656	0.409944	0.136648	1.85308	0.615125	0.205042		72.5565	0.360423					69.8032	1.11606	0.114622
																																	71.5076	3.21565	0.396486	0.132162	1.85023	0.626146	0.208715		73.0565	0.37079					70.2992	1.11238	0.117186
																																	72.0065	3.21658	0.394892	0.131631	1.83566	0.603436	0.201145		73.5565	0.344127					70.8032	1.10918	0.116805
																																	72.5065	3.19341	0.3621	0.1207	1.82939	0.603487	0.201162		74.0566	0.37095					71.3032	1.10662	0.11542
																																	73.0066	3.19938	0.460645	0.153548	1.82494	0.598476	0.199492		74.5565	0.358269					71.8032	1.10233	0.111904
																																	73.5065	3.20116	0.407365	0.135788	1.83127	0.60314	0.201047		75.0566	0.359042					72.3032	1.09736	0.114042
																																	74.0065	3.18952	0.360674	0.120225	1.81554	0.594097	0.198032		75.5565	0.365826					72.8032	1.09502	0.109581
																																	74.5066	3.21805	0.334321	0.11144	1.80807	0.583277	0.194426		76.0565	0.358535					73.3032	1.09056	0.11058
																																	75.0065	3.22366	0.489486	0.163162	1.80065	0.577656	0.192552		76.5525	0.362926					73.7982	1.08427	0.107912
																																	75.5065	3.17416	0.414143	0.138048	1.80235	0.588526	0.196175		77.0565	0.367219					74.3032	1.0796	0.104122
																																	76.0065	3.19655	0.406403	0.135468	1.79033	0.573926	0.191309		77.5565	0.366164					74.8032	1.08353	0.107043
																																	76.5065	3.17142	0.458294	0.152765	1.79966	0.581757	0.193919		78.0565	0.375047					75.3032	1.08075	0.105976
																																	77.0025	3.14104	0.425234	0.141745	1.78064	0.571172	0.190391		78.5565	0.387089					75.8032	1.0734	0.104318
																																	77.5065	3.18814	0.407119	0.135706	1.78387	0.575971	0.19199		79.0565	0.364764					76.3042	1.06982	0.103824
																																	78.0066	3.11113	0.360718	0.120239	1.77944	0.564982	0.188327		79.5565	0.383432					76.8032	1.06188	0.101447
																																	78.5066	3.11485	0.388024	0.129341	1.78089	0.57344	0.191147		80.0525	0.373242					77.3042	1.06197	0.103658
																																	79.0066	3.09305	0.330121	0.11004	1.76687	0.563921	0.187974		80.5565	0.3717					77.7982	1.05638	0.0983282
																																	79.5065	3.08441	0.364758	0.121586	1.80145	0.594038	0.198013		81.0575	0.373693					78.3042	1.05741	0.100874
																																	80.0065	3.11792	0.362446	0.120815	1.75906	0.553715	0.184572		81.5565	0.36233					78.8042	1.05395	0.101019
																																	80.5065	3.09677	0.482672	0.160891	1.7796	0.57526	0.191753		82.0576	0.358069					79.3032	1.04715	0.0975386
																																	81.0065	3.0784	0.416663	0.138888	1.7565	0.560485	0.186828		82.5575	0.36204					79.8032	1.04572	0.0963743
																																	81.5066	3.06206	0.393274	0.131091	1.73309	0.53216	0.177387		83.0565	0.371807					80.3032	1.04267	0.0978537
																																	82.0065	3.02158	0.381892	0.127297	1.73334	0.545119	0.181706		83.5565	0.386977					80.8032	1.03749	0.095501
																																	82.5066	3.0703	0.432145	0.144048	1.73294	0.530696	0.176899		84.0566	0.373855					81.3032	1.03791	0.10028
																																	83.0066	3.0433	0.359083	0.119694	1.72776	0.531202	0.177067		84.5565	0.373819					81.8032	1.03048	0.0937754
																																	83.5065	3.10587	0.343241	0.114414	1.71737	0.525708	0.175236		85.0565	0.365041					82.3032	1.02872	0.0966802
																																	84.0065	3.00996	0.354065	0.118022	1.72081	0.524326	0.174775		85.5565	0.361848					82.8032	1.02876	0.0903827
																																	84.5066	3.0113	0.45384	0.15128	1.72089	0.545358	0.181786		86.0565	0.376085					83.3033	1.02213	0.0931012
																																	85.0066	3.02493	0.3105	0.1035	1.70908	0.532961	0.177654		86.5566	0.370173					83.8042	1.01947	0.0905116
																																	85.5065	3.04324	0.389662	0.129887	1.71515	0.534564	0.178188		87.0565	0.385413					84.3032	1.0179	0.0924326
																																	86.0065	3.01802	0.420559	0.140186	1.72427	0.554983	0.184994		87.5565	0.35325					84.8033	1.01428	0.0921516
																																	86.5066	2.96579	0.330899	0.1103	1.69449	0.531651	0.177217		88.0566	0.371757					85.3032	1.00844	0.0908086
																																	87.0066	3.00315	0.386888	0.128963	1.69363	0.530549	0.17685		88.5566	0.372361					85.8042	1.00561	0.0893544
																																	87.5066	2.96384	0.338606	0.112869	1.6829	0.521224	0.173741		89.0565	0.38797					86.3032	1.00529	0.0912046
																																	88.0065	2.99272	0.400983	0.133661	1.67959	0.517697	0.172566		89.5565	0.377031					86.8042	1.00166	0.0927692
																																	88.5066	2.9895	0.370868	0.123623	1.68508	0.531838	0.177279		90.0565	0.357416					87.3042	0.996567	0.0869788
																																	89.0065	2.95981	0.34878	0.11626	1.665	0.516375	0.172125		90.5565	0.3815					87.8042	0.996056	0.0870193
																																	89.5065	2.96327	0.367185	0.122395	1.70306	0.545687	0.181896		91.0565	0.352153					88.3042	0.993463	0.0846155
																																	90.0065	2.94721	0.361598	0.120533	1.67487	0.522209	0.17407		91.5575	0.375969					88.8043	0.989193	0.0859985
																																	90.5066	2.92347	0.3405	0.1135	1.65786	0.510446	0.170149		92.0515	0.384189					89.3042	0.986256	0.0840076
																																	91.0065	2.96137	0.342534	0.114178	1.66121	0.51242	0.170807		92.5565	0.368217					89.8042	0.985355	0.0848141
																																	91.5066	3.01013	0.450466	0.150155	1.65331	0.512045	0.170682		93.0565	0.366431					90.3042	0.984176	0.0872374
																																	92.0015	2.9065	0.355715	0.118572	1.66246	0.515645	0.171882		93.5575	0.37014					90.8032	0.976812	0.0886311
																																	92.5065	2.94986	0.400473	0.133491	1.64545	0.497565	0.165855		94.0565	0.36442					91.3032	0.973452	0.083079
																																	93.0066	2.9028	0.366171	0.122057	1.64509	0.496968	0.165656		94.5515	0.383652					91.8032	0.972023	0.083964
																																	93.5066	2.89356	0.347251	0.11575	1.66046	0.512337	0.170779		95.0565	0.394971					92.3032	0.970881	0.0835715
																																	94.0065	2.87741	0.377565	0.125855	1.63389	0.491527	0.163842		95.5576	0.37293					92.8032	0.969867	0.0858068
																																	94.5066	2.88952	0.348109	0.116036	1.63378	0.495311	0.165104		96.0565	0.385708					93.3032	0.964194	0.0833842
																																	95.0066	2.85728	0.310209	0.103403	1.63395	0.490855	0.163618		96.5565	0.374348					93.8032	0.963155	0.0835781
																																	95.5066	2.84304	0.323259	0.107753	1.63961	0.501965	0.167322		97.0566	0.37034					94.3032	0.956594	0.0797167
																																	96.0065	2.90188	0.359953	0.119984	1.6302	0.491949	0.163983		97.5565	0.361572					94.8032	0.955958	0.0792875
																																	96.5066	2.84689	0.320665	0.106888	1.62915	0.491556	0.163852		98.0565	0.37354					95.3032	0.952167	0.0826628
																																	97.0066	2.86111	0.374983	0.124994	1.64857	0.510438	0.170146		98.5565	0.352001					95.8032	0.948984	0.0778533
																																	97.5065	2.81935	0.297003	0.0990011	1.61404	0.475182	0.158394		99.0565	0.368503					96.3042	0.946291	0.0773163
																																	98.0065	2.82325	0.357134	0.119045	1.60969	0.473675	0.157892		99.5566	0.3903					96.7982	0.947435	0.0808712
																																	98.5025	2.90268	0.336443	0.112148	1.63857	0.507106	0.169035		100.057	0.347231					97.3042	0.941455	0.0801271
																																	99.0065	2.84965	0.405702	0.135234	1.61219	0.472321	0.15744		100.557	0.372431					97.8042	0.943183	0.0791659
																																	99.5066	2.81644	0.361504	0.120501	1.61283	0.479476	0.159825		101.057	0.361713					98.3042	0.939559	0.0778563
																																	100.007	2.82608	0.320613	0.106871	1.60239	0.476496	0.158832		101.557	0.365883					98.8042	0.934837	0.0773208
																																	100.506	2.85706	0.37302	0.12434	1.60099	0.470963	0.156988		102.057	0.390857					99.2982	0.9357	0.0774297
																																	101.007	2.78	0.298009	0.0993364	1.61064	0.475642	0.158547		102.557	0.378773					99.8032	0.932034	0.0746792
																																	101.507	2.7833	0.338699	0.1129	1.60737	0.47447	0.158157		103.057	0.368201					100.304	0.92789	0.0727034
																																	102.007	2.78686	0.309988	0.103329	1.60494	0.471264	0.157088		103.557	0.371848					100.804	0.926409	0.076623
																																	102.507	2.78581	0.315183	0.105061	1.61663	0.488119	0.162706		104.057	0.377059					101.304	0.926063	0.0768751
																																	103.006	2.79716	0.358409	0.11947	1.62252	0.498125	0.166042		104.557	0.34532					101.803	0.921872	0.0757965
																																	103.502	2.83821	0.349397	0.116466	1.60848	0.482476	0.160825		105.058	0.348571					102.303	0.919002	0.0772189
																																	104.007	2.77138	0.300864	0.100288	1.61406	0.482438	0.160813		105.558	0.354732					102.803	0.916037	0.0761137
																																	104.507	2.75759	0.292813	0.0976043	1.60178	0.469646	0.156549		106.057	0.363834					103.303	0.916066	0.0741968
																																	105.003	2.74853	0.313348	0.104449	1.5886	0.467687	0.155896		106.557	0.3741					103.803	0.913099	0.0760116
																																	105.507	2.69553	0.295613	0.0985376	1.5899	0.463223	0.154408		107.057	0.396043					104.303	0.910086	0.0716356
																																	106.007	2.75585	0.314794	0.104931	1.58727	0.468065	0.156022		107.557	0.364558					104.803	0.910129	0.0762515
																																	106.507	2.71836	0.353245	0.117748	1.5833	0.465045	0.155015		108.057	0.365996					105.563	0.921672	0.073389
																																	107.007	2.69336	0.336602	0.112201	1.59055	0.471404	0.157135		108.556	0.362641					105.993	0.91747	0.0749591
																																	107.507	2.72464	0.327223	0.109074	1.57609	0.47012	0.156707		109.057	0.3452					106.618	0.919284	0.0744267
																																	108.007	2.70362	0.34611	0.11537	1.57192	0.465535	0.155178		109.557	0.37248					107.239	0.915114	0.0747407
																																	108.507	2.68395	0.303943	0.101314	1.58679	0.478782	0.159594		110.057	0.35403					107.668	0.911887	0.0734912
																																	109.271	2.69546	0.36324	0.12108	1.56838	0.464485	0.154828		110.557	0.351709					108.293	0.910079	0.0736536
																																	109.723	2.72207	0.410472	0.136824	1.56646	0.459227	0.153076		111.053	0.36063					108.915	0.908078	0.0751131
																																	110.377	2.75218	0.289159	0.102233	1.5549	0.463095	0.154365		111.557	0.353299					109.345	0.905849	0.0750453
																																	111.028	2.75341	0.332256	0.11747	1.57037	0.471266	0.157089		112.057	0.338874					109.97	0.900805	0.074183
																																	111.478	2.73512	0.292488	0.10341	1.55918	0.471041	0.157014		112.557	0.349856					110.591	0.901602	0.0772229
																																	112.127	2.73712	0.290912	0.102853	1.55759	0.466516	0.155505		113.057	0.360635					111.022	0.896398	0.0743292
																																	112.774	2.73461	0.295598	0.10451	1.57215	0.485056	0.161685		113.557	0.364831					111.646	0.896868	0.0732561
																																	113.223	2.70095	0.267531	0.0945864	1.55432	0.468795	0.156265		114.057	0.377246					112.268	0.892241	0.0746412
																																	113.877	2.73175	0.322864	0.11415	1.54416	0.458927	0.152976		114.557	0.371041					112.697	0.88733	0.0739838
																																	114.529	2.73092	0.335547	0.118634	1.54803	0.466376	0.155459		115.057	0.370038					113.322	0.904271	0.0767918
																																	114.979	2.71134	0.327982	0.115959	1.56522	0.489258	0.163086		115.557	0.362845					113.944	0.889846	0.0762303
																																	115.634	2.68949	0.270671	0.0956966	1.54509	0.47017	0.156723		116.057	0.36315					114.375	0.867584	0.0803091
																																	116.285	2.67371	0.303065	0.10715	1.56978	0.494019	0.164673		116.557	0.364998					114.999	0.860668	0.0739559
																																	116.737	2.70455	0.252168	0.0891547	1.53389	0.465165	0.155055		117.057	0.377172					115.621	0.863997	0.0743788
																																	117.391	2.66603	0.254262	0.0898951	1.53582	0.471122	0.157041		117.557	0.374374					116.05	0.895552	0.0524659
																																	118.042	2.66009	0.281738	0.0996094	1.52609	0.468334	0.156111		118.057	0.370767					116.675	0.890649	0.0478987
																																	118.491	2.63814	0.279473	0.0988086	1.55876	0.486388	0.162129		118.557	0.352999					117.297	0.929731	#DIV/0!
																																	119.145	2.66698	0.309488	0.109421	1.5445	0.487436	0.162479		119.057	0.366502					117.728	0.918969	#DIV/0!
																																	119.797	2.66378	0.298358	0.105486	1.52568	0.467967	0.155989		119.557	0.361145					118.353	0.91163	#DIV/0!
																																	120.247	2.6627	0.293072	0.103617	1.52174	0.468204	0.156068		120.056	0.360148					118.976	#DIV/0!	#DIV/0!
																																	120.9	2.65707	0.29847	0.105525	1.53403	0.480223	0.160074		120.557	0.347525					119.405	#DIV/0!	#DIV/0!
																																	121.547	2.61808	0.291158	0.10294	1.52244	0.468166	0.156055		121.053	0.369368						#DIV/0!	#DIV/0!
																																	121.992	2.64784	0.295975	0.104643	1.51823	0.469138	0.156379		121.557	0.365769						#DIV/0!	#DIV/0!
																																	122.646	2.61815	0.277736	0.0981944	1.51834	0.474376	0.158125		122.057	0.368882						#DIV/0!	#DIV/0!
																																	123.298	2.72614	0.369114	0.130501	1.51854	0.472925	0.157642		122.557	0.352593						#DIV/0!	#DIV/0!
																																	123.747	2.61972	0.323792	0.114478	1.50432	0.465329	0.15511		123.057	0.358026						#DIV/0!	#DIV/0!
																																	124.401	2.65057	0.332542	0.117571	1.51507	0.474317	0.158106		123.557	0.359295						#DIV/0!	#DIV/0!
																																	125.052	2.58548	0.26905	0.0951235	1.51585	0.480334	0.160111		124.057	0.357151						#DIV/0!	#DIV/0!
																																	125.503	2.60112	0.30279	0.107053	1.50115	0.468571	0.15619		124.557	0.403196
																																	126.157	2.612	0.308304	0.109002	1.51943	0.484823	0.161608		125.057	0.351726
																																	126.809	2.60259	0.311792	0.110235	1.5031	0.465125	0.155042		125.558	0.373514
																																	127.259	2.60039	0.294839	0.104241	1.50077	0.477435	0.159145		126.057	0.348512
																																	127.913	2.58529	0.306172	0.108248	1.49678	0.465632	0.155211		126.557	0.358702
																																	128.566	2.55066	0.280461	0.0991581	1.49517	0.461678	0.153893		127.057	0.370689
																																	129.016	2.55754	0.292575	0.103441	1.49249	0.467286	0.155762		127.552	0.365743
																																	129.67	2.57594	0.330957	0.117011	1.49683	0.469833	0.156611		128.057	0.360109
																																	130.321	2.54804	0.296749	0.104917	1.52552	0.489747	0.163249		128.557	0.343841
																																	130.772	2.5333	0.3049	0.107799	1.51443	0.495325	0.165108		129.052	0.337601
																																	131.426	2.57615	0.314781	0.111292	1.48234	0.46362	0.15454		129.556	0.350257
																																	132.079	2.541	0.298535	0.105548	1.48485	0.463389	0.154463		130.057	0.362179
																																	132.529	2.52707	0.303999	0.10748	1.49126	0.469186	0.156395		130.557	0.350845
																																	133.183	2.50708	0.341447	0.12072	1.47871	0.4673	0.155767		131.052	0.352939
																																	133.834	2.51534	0.302469	0.106939	1.47856	0.46791	0.15597		131.557	0.368765
																																	134.283	2.51247	0.345766	0.122247	1.47541	0.458588	0.152863		132.057	0.356436
																																	134.937	2.51833	0.34064	0.120435	1.48029	0.461592	0.153864		132.557	0.3487
																																	135.588	2.46492	0.302162	0.10683	1.47287	0.464434	0.154811		133.057	0.350511
																																	136.039	2.47791	0.341243	0.120648	1.51676	0.515497	0.171832		133.557	0.329836
																																	136.693	2.46207	0.341852	0.120863	1.4853	0.473264	0.157755		134.057	0.347108
																																	137.345	2.48035	0.345221	0.122054	1.48404	0.470964	0.156988		134.556	0.348764
																																	137.795	2.46274	0.321823	0.113782	1.48483	0.481776	0.160592		135.057	0.328507
																																	138.449	2.43599	0.313538	0.110853	1.46478	0.45052	0.150173		135.557	0.349072
																																	139.101	2.48805	0.365266	0.129141	1.48882	0.474425	0.158142		136.057	0.324372
																																	139.55	2.52131	0.393562	0.139145	1.46144	0.454874	0.151625		136.557	0.339346
																																	140.204	2.40575	0.329267	0.116413	1.45815	0.454978	0.151659		137.057	0.350373
																																	140.856	2.41545	0.338405	0.119644	1.45854	0.447785	0.149262		137.557	0.33797
																																	141.307	2.43159	0.342474	0.129443	1.46478	0.452309	0.15077		138.057	0.354145
																																	141.961	2.4229	0.361185	0.136515	1.46309	0.449098	0.149699		138.552	0.370931
																																	142.613	2.31791	0.311573	0.127199	1.45811	0.450293	0.150098		139.057	0.339787
																																	143.062	2.31921	0.309945	0.126534	1.45949	0.455334	0.151778		139.557	0.342186
																																	143.716	2.30646	0.267653	0.109269	1.45924	0.445184	0.148395		140.057	0.351724
																																	144.367	2.29207	0.312933	0.127755	1.45566	0.451563	0.150521		140.557	0.352921
																																	144.818	2.26865	0.302277	0.123404	1.45012	0.446635	0.148878		141.057	0.313132
																																	145.472	2.27802	0.316764	0.129318	1.45165	0.448109	0.14937		141.557	0.311119
																																	146.124	2.34839	0.354605	0.158584	1.44229	0.447885	0.149295		142.057	0.301283
																																	146.575	2.25605	0.314118	0.140478	1.46306	0.462495	0.154165		142.557	0.296156
																																	147.229	2.27877	0.343723	0.171861	1.45953	0.466664	0.155555		143.057	0.283937
																																	147.881	2.20757	0.366765	0.183382	1.44552	0.441454	0.147151		143.558	0.308172
																																	148.332	2.18236	0.355828	0.177914	1.44756	0.453869	0.15129		144.057	0.339226
																																	148.986	2.28895	0.364262	0.182131	1.44263	0.446144	0.148715		144.557	0.286657
																																	149.637	2.31507	0.421522	0.243366	1.44359	0.446623	0.148874		145.057	0.293388
																																	150.087	2.37919	0.462201	0.266852	1.45239	0.4594	0.153133		145.557	0.249394
																																	150.741	2.26224	0.405576	0.23416	1.45328	0.462128	0.154043		146.057	0.252194
																																	151.393	2.29826	0.441869	0.255113	1.43813	0.453249	0.151083		146.557	0.301928
																																	151.843	2.2799	0.37437	0.216143	1.43123	0.441376	0.147125		147.057	0.321269
																																	152.497	2.27419	0.420079	0.242533	1.43426	0.45412	0.151373		147.558	0.347139
																																	153.149	2.24528	0.416066	0.240216	1.44115	0.461118	0.153706		148.057	0.294895
																																	153.6	2.25692	0.372051	0.214804	1.43114	0.445643	0.148548		148.557	0.316041
																																	154.253	2.23087	0.402898	0.232613	1.42816	0.448769	0.14959		149.057	0.311954
																																	154.904	2.26856	0.39107	0.225784	1.42661	0.443004	0.147668		149.557	0.307158
																																	155.354	2.24154	0.40465	0.233625	1.42676	0.449672	0.149891		150.057	0.296292
																																	156.008	2.28831	0.450214	0.259931	1.43055	0.459822	0.153274		150.557	0.292818
																																	156.66	2.21995	0.369042	0.213067	1.4919	0.463694	0.163941		151.057	0.350685
																																	157.11	2.20722	0.404077	0.233294	1.47333	0.446971	0.158028		151.557	0.379926
																																	157.763	2.45488	0.124514	0.088045	1.46943	0.446684	0.157927		152.057	0.332253
																																	158.415	2.39231	0.152813	0.108055	1.46783	0.447292	0.158142		152.557	0.360537
																																	158.865	2.41457	0.150119	0.10615	1.46912	0.450271	0.159195		153.057	0.32776
																																	159.519	2.50802	0.236358	0.16713	1.47758	0.447041	0.158053		153.557	0.308546
																																	160.171	2.48891	0.00676701	0.004785	1.47706	0.455739	0.161128		154.057	0.409486
																																		2.43883	0.119551	0.084535	1.4679	0.448115	0.158432		154.557	0.396519
																																		2.436	0.115364	0.081575	1.51067	0.498568	0.17627		155.057	0.386465
																																		2.40243	0.115987	0.082015	1.46585	0.451033	0.159464		155.557	0.450861
																																		2.39328	0.131946	0.0933	1.46206	0.445545	0.157524		156.057	0.446806
																																		2.44014	0.0751372	0.05313	1.47086	0.448721	0.158647		156.557	0.414508
																																		2.39435	0.119551	0.084535	1.48242	0.463437	0.16385		157.057	0.41554
																																		2.39342	0.138381	0.09785	1.53837	0.424625	0.160493		157.557	0.410301
																																		2.43256	0.0695934	0.04921	1.53959	0.425605	0.160864		158.057	0.399446
																																		2.39412	0.132462	0.093665	1.53099	0.422416	0.159658		158.558	0.428834
																																		2.39574	0.0961241	0.06797	1.55142	0.439851	0.166248		159.058	0.400808
																																		2.45009	0.0130178	0.009205	1.53258	0.420471	0.158923		159.557	0.399731
																																		2.34194	0.179492	0.12692	1.54253	0.430403	0.162677		160.057	0.430479
																																		2.35208	0.184208	0.130255	1.54457	0.435367	0.164553		160.557	0.411447
																																		2.39583	0.112734	0.079715	1.56471	0.457312	0.172848		161.053	0.396211
																																		2.45049	0.110507	0.07814	1.5244	0.415401	0.157007		161.557	0.426204
																																		2.51103	0.0495328	0.035025	1.52347	0.415135	0.156906		162.057	0.373262
																																		2.30614	0.174853	0.12364	1.49021	0.443726	0.181151		162.556	0.517609
																																		2.36689	0.11873	0.083955	1.49371	0.450392	0.183872		163.057	0.521055
																																		2.41528	0.0423769	0.029965	1.50376	0.455557	0.18598		163.557	0.530286
																																		2.38709	0.0521067	0.036845	1.49051	0.444471	0.181454		164.057	0.566305
																																		2.28551	0.184498	0.13046	1.49252	0.449199	0.183385		164.557	0.501142
																																		2.27259	0.179838	0.127165	1.56268	0.519807	0.212211		165.057	0.504063
																																		2.32731	0.135241	0.09563	1.48533	0.434443	0.17736		165.557	0.541958
																																		2.28791	0.126226	0.089255	1.50957	0.460171	0.187864		166.057	0.529607
																																		2.31487	0.114558	0.081005	1.48003	0.433384	0.176928		166.558	0.490508
																																		2.25207	0.162578	0.11496	1.48079	0.4388	0.179139		167.057	0.497957
																																		2.25141	0.206397	0.145945	1.60781	0.337186	0.150794		167.557	0.523614
																																		2.31998	0.193125	0.13656	1.63314	0.347561	0.155434		168.057	0.483359
																																		2.32015	0.0753847	0.053305	1.77233	0.124511	0.0622557		168.557	0.561213
																																		2.26005	0.122089	0.08633	1.68828	0.0764015	0.0441105		169.057	0.676322
																																		2.22355	0.230404	0.16292	1.69224	0.0769282	0.0444145		169.556	0.686367
																																		2.30861	#DIV/0!	#DIV/0!	1.69704	0.106886	0.07558		170.058	0.794899
																																		2.39147	#DIV/0!	#DIV/0!	1.65412	0.0450003	0.03182		170.557	0.772558
																																		2.33121	#DIV/0!	#DIV/0!	1.66609	0.0993131	0.070225		171.057	0.765278
																																		2.32861	#DIV/0!	#DIV/0!	1.73856	#DIV/0!	#DIV/0!		171.557	0.848225
																																		2.30665	#DIV/0!	#DIV/0!	1.71783	#DIV/0!	#DIV/0!		172.052	0.89446
																																		2.26882	#DIV/0!	#DIV/0!	1.68339	#DIV/0!	#DIV/0!		172.557	0.948064
																																		2.27539	#DIV/0!	#DIV/0!	1.72819	#DIV/0!	#DIV/0!		173.057	0.91603
																																		2.38501	#DIV/0!	#DIV/0!	1.75709	#DIV/0!	#DIV/0!		173.557	0.871106
																																		#DIV/0!	#DIV/0!	#DIV/0!	1.81229	#DIV/0!	#DIV/0!		174.057	#DIV/0!
																																		#DIV/0!	#DIV/0!	#DIV/0!					174.557	#DIV/0!
																																									175.058	#DIV/0!
																																									175.557	#DIV/0!
																																									176.057
																																									176.552
																																									177.057
																																									177.558
																																									178.057
																																									178.557
																																									179.058
																																									179.557
[truncated: 69 more columns]
