# Supplementary material for: Mechanically stimulated ATP release from murine bone cells is regulated by a balance of injury and repair
Source: eLife. 2018 Oct 16;7:e37812. doi: 10.7554/eLife.37812 (PMC6205812; doi:10.7554/eLife.37812)
Supplement: Figure 2—source data 1. [file elife-37812-fig2-data1.xlsx]

## Sheet: Fig2
													Panel A																			Panel B								Panel C
																																		conc (uM)	log10(M)							log10(M)	resp
														Rel. Time (s)	Mean of ROI Object 1	Mean of ROI Object 2	Mean of ROI Object 3	Mean of ROI Object 4	Mean of ROI Object 5	Mean of ROI Object 6	Mean of ROI Object 7	Mean of ROI Object 8	Mean of ROI Object 9	Mean of ROI Object 10	Mean of ROI Object 11	Mean of ROI Object 12		Rel. Time (s)	pericellular				dlucFluc_poke_1	6.23131	-5.20542						trial 1	-6.90414	0
														0	1423.24	1293.61	1280.38	1337.44	1331.58	1410.79	1364.05	1433.09	1459.28	1438.83	1428.44	1527.17		0	1052.34				dlucFluc_poke_2	21.7247	-4.66305						trial 2	-6.27945	0.2
														0.061396	1420.15	1291.43	1279.33	1335.14	1325.97	1407.54	1361.26	1427.09	1451.94	1435.37	1423.98	1527.01		1.0129	1047.29				dlucFluc_poke_3	0.0979284	-7.00909						trial 3	-5.66227	1
														0.122443	1419.06	1289.76	1277.3	1334.84	1327.54	1408.3	1360.6	1428.29	1453.46	1438.1	1425.51	1526.06		2.04113	1043.22				dlucFluc_poke_4	0.0509997	-7.29243						trial 4	-5.45	1
														0.183611	1424.42	1293.7	1280.18	1339.67	1331.97	1410.6	1367.49	1433.61	1459.17	1438.28	1429.02	1530.9		3.06332	1039.64				dlucFluc_poke_5	53.9175	-4.26827						trial 5	-5.66097	1
														0.244669	1422.25	1292.21	1278.28	1335.06	1328.38	1410.61	1362.73	1427.99	1457.04	1437.33	1426.56	1529.34		4.08628	1035.28				dlucFluc_poke_6	0.191892	-6.71694						trial 6	-5.60617	0.25
														0.305889	1417.98	1293.33	1280.46	1334.95	1327.76	1410.24	1361.07	1429.08	1455.39	1436.74	1426.46	1525.23		5.01091	1034.34				dlucFluc_poke_7	8.49223	-5.07098						trial 7	-6.80068	0.25
														0.367032	1421.1	1292.01	1282.91	1338.28	1329.86	1407.53	1361.35	1427.63	1453.11	1438.68	1425.59	1523.82		6.03755	1030.86				dlucFluc_poke_8	80.5397	-4.09399						trial 8	-6.53654	0.727273
														0.428191	1422.11	1295.43	1279.91	1335.72	1330.46	1410.81	1365.21	1432.48	1454.49	1437.92	1424.92	1530.82		7.05853	1027.64				dlucFluc_poke_9	0.495655	-6.30482						trial 9	-6.59094	0
														0.489438	1424.77	1294.03	1279.85	1339.45	1330.31	1408.82	1362.8	1432.12	1455.13	1439.71	1428.15	1529.19		8.08291	1031.18				dlucFluc_poke_10	0.258322	-6.58784						trial 10	-6.43782	0
														0.550579	1428.01	1297.02	1286.11	1337.81	1333.06	1413.52	1366.65	1435.21	1460.1	1440.17	1433.18	1533.97		9.01095	1023.45				dlucFluc_poke_11	0.813984	-6.08938						trial 11	-6.44567	0
														0.611653	1423.27	1295.71	1281.88	1338.35	1331.33	1410.64	1364.27	1430.66	1456.87	1439.76	1428.99	1528.37		10.0362	1023.07				dlucFluc_poke_12	5.61272	-5.25083						trial 12	-6.80853	0
														0.672954	1419.85	1293.4	1281.23	1336.9	1326.98	1409.93	1363.44	1430.18	1456.62	1435.51	1426.38	1526.83		11.054	915.023				dlucFluc_poke_13	24.2659	-4.615						trial 13	-6.65401	0
														0.734113	1420.24	1292.77	1278.57	1335.93	1330.21	1406.86	1360.84	1430.66	1453.53	1436.72	1423.71	1522.6		12.0776	984.37												trial 14	-6.33977	0.714286
														0.795234	1417.27	1291.04	1277.36	1333.93	1327.17	1406.39	1360.76	1429.81	1452	1434.77	1423.65	1525.22		13.011	979.063												trial 15	-6.02998	0.666667
														0.856487	1418.42	1290.04	1280.65	1334.97	1327.54	1406.52	1360.35	1429.04	1453.82	1435.31	1424.08	1522.61		14.0364	990.399												trial 16	-6.95	0.111111
														0.917531	1417.66	1293.75	1277.9	1335.98	1327	1408.23	1361.68	1431.57	1455.12	1441.34	1426.23	1522.81		15.0572	995.224												trial 17	-5.93135	1
														0.978743	1416.92	1290.93	1275.22	1333.04	1324.31	1406.17	1360.63	1430.76	1451.98	1431.56	1422.15	1522.02		16.0764	991.983												trial 18	-6.76252	0.214286
														1.04	1420.58	1290.86	1280.5	1336.87	1329.11	1410.68	1362.26	1431.73	1455.67	1438.06	1423.37	1525.58		17.0119	996.701												trial 19	-6.73694	0.9
														1.10106	1425.16	1294.36	1278.11	1334.2	1329.52	1411.93	1363.24	1431.83	1455.46	1439.66	1424.62	1526.56		18.0397	997.538												trial 20	-6.41494	0.25
														1.16222	1418.14	1290.58	1277.28	1330.3	1326.9	1406.94	1362.45	1428.76	1452.49	1437.56	1423.48	1525.26		19.063	993.562
														1.22346	1414.26	1290.97	1274.43	1332.62	1323.4	1403.1	1359.11	1423.37	1450.98	1433.59	1423.69	1523.15		20.0881	987.012
														1.28458	1416.47	1288.66	1276.66	1334.7	1326.03	1408.13	1360.46	1428.5	1452.16	1434.21	1426.91	1525.26		21.0109	985.094
														1.3457	1419.34	1292.31	1276.54	1334.03	1326.61	1407.8	1361.12	1427.12	1453.44	1437.2	1424.69	1521.96		22.0069	987.334
														1.4068	1418.98	1292.2	1275.64	1334.87	1329.33	1408.67	1362.83	1429.73	1453.31	1435.32	1425.25	1526.87		23.012	987.942
														1.46807	1411.91	1287.9	1273.43	1328.24	1322.73	1402.63	1357.17	1424.46	1445.35	1431.68	1420.14	1514.21		24.0109	990.646
														1.52923	1415.63	1287.27	1274.41	1330.16	1320.27	1403.53	1359.18	1425.03	1452.95	1432.53	1420.44	1521.14		25.0109	987.8
														1.59032	1411.44	1289.73	1274.63	1332.26	1326.78	1404.16	1359.97	1426.98	1453.45	1432.73	1421.2	1521.45		26.0119	990.399
														1.65152	1418.34	1287.31	1276.65	1331.18	1325.72	1405.18	1359.73	1423.9	1448.67	1430.9	1420.69	1519.9		27.0119	989.228
														1.71265	1414.93	1288.36	1274.4	1329.7	1324.37	1403.08	1358.53	1424.98	1451	1432.82	1422.88	1518.78		28.0119	987.497
														1.7738	1413.9	1287.09	1275.48	1327.99	1321.56	1402.25	1357.45	1424.58	1447.72	1430.46	1418.66	1518.33		29.012	985.5
														1.8349	1414.13	1288.85	1277.82	1333.62	1325.95	1401.94	1359.71	1426.47	1448.9	1435.7	1423.53	1519.54		30.012	985.637
														1.89617	1411.54	1285.92	1272.38	1327.49	1320.77	1400.58	1353.52	1420.07	1447.34	1431.14	1418.1	1515.58		31.0119	989.361
														1.95726	1411.86	1285.16	1273.47	1330.64	1322.22	1401.17	1355.55	1420.39	1446.59	1426.66	1417.56	1513.99		32.0109	987.044
														2.01851	1412.74	1288.32	1271.46	1330.05	1320.25	1403.17	1356.54	1421.01	1448.4	1434.52	1423.93	1519.96		33.0109	981.482
														2.07965	1412.18	1290.78	1274.06	1331.94	1322.15	1401.1	1356.5	1425.82	1450.27	1432.74	1422.88	1519.62		34.012	984.373
														2.14073	1411.58	1284.37	1269.89	1325.85	1319.66	1401.11	1357.85	1422.6	1449.5	1430.06	1415.97	1517.32		35.011	987.9
														2.20203	1413.44	1289.4	1273.33	1331.82	1323.39	1398.7	1356.63	1424.15	1445.16	1431.41	1420.34	1515.99		36.0119	983.556
														2.26315	1413.18	1287.59	1275.06	1331.81	1323.04	1402.02	1357.98	1426.75	1448.71	1431.22	1416.43	1519.93		37.0069	981.325
														2.32426	1413.25	1285.18	1271.25	1331.69	1320.76	1400.57	1356.53	1423.44	1445.07	1428.39	1419.35	1516.92		38.0119	988.58
														2.38545	1412.54	1288.19	1274.76	1329.7	1321.88	1401.81	1356.96	1424.28	1448.33	1432.95	1420.05	1518.97		39.012	983.367
														2.44666	1413.78	1291.81	1277.68	1333.41	1324.06	1403.21	1359.46	1426.34	1451.67	1434.76	1419.45	1520.28		40.012	979.544
														2.50771	1414.08	1284.81	1272.55	1329.5	1324.04	1398.92	1355.49	1424.47	1446.5	1430.29	1417.5	1515.9		41.0119	981.776
														2.56896	1407.14	1282.04	1270.57	1326.76	1317.38	1396.5	1352.11	1417.21	1441.97	1426.01	1412.39	1514.58		42.012	980.35
														2.6301	1408.6	1283.16	1268.92	1328.26	1317.12	1396.41	1353.39	1418.63	1443.63	1427.89	1415.25	1512.06		43.0109	982.2
														2.69121	1411.69	1287.23	1273	1329.02	1320.58	1396.4	1355.82	1422.06	1447.21	1430.25	1416.75	1520.13		44.0119	982.917
														2.75249	1410.77	1285.5	1272.79	1329.19	1323.08	1399.52	1357.01	1422.45	1445.59	1431.59	1419.31	1519.44		45.0109	983.961
														2.81353	1406.7	1284.16	1272.12	1325.76	1321.78	1395.74	1353.65	1417.32	1445.58	1430.09	1414.79	1514.01		46.0109	981.817
														2.8747	1408.23	1284.46	1270.76	1325.35	1320.27	1398	1354.22	1418.59	1445.11	1427.31	1414.66	1510.72		47.0119	983.277
														2.93596	1404.06	1280.02	1265.87	1321.21	1315.26	1392.75	1350.57	1419.74	1439.97	1423	1410.23	1511.6		48.0109	981.374
														2.99708	1402.57	1282.47	1266.49	1324.72	1317.68	1389.08	1348.51	1416.15	1439.08	1424.67	1411.79	1507.78		49.012	983.107
														3.05816	1400.75	1279.61	1267.11	1324.99	1316.56	1392.5	1348.41	1414.51	1438.72	1424.58	1410.57	1509.25		50.012	982.166
														3.11939	1408.54	1280.54	1269.51	1323.09	1316.25	1397.63	1350.07	1416.85	1440.67	1425.53	1414.59	1514.04		51.012	979.347
														3.18058	1403.14	1280.64	1265.07	1322.74	1316.2	1392.06	1347.98	1416.4	1437.89	1424.2	1411.94	1508.9		52.0119	980.17
														3.24171	1409.99	1286.98	1270.53	1329.86	1322.61	1397.93	1354.18	1423.47	1445	1427.69	1415.02	1514.91		53.0119	978.766
														3.3029	1405.43	1283.23	1272.36	1329.19	1319.09	1400.15	1353.05	1424.75	1445.93	1428.42	1418.66	1512.01		54.0109	978.376
														3.36407	1401.41	1279.11	1266.48	1320.17	1312.85	1396.35	1348.95	1414.8	1443.36	1424.19	1414.37	1508.88		55.011	978.94
														3.4252	1401.04	1281.74	1265.25	1320	1315.05	1391.3	1346.28	1414.84	1438.29	1420.31	1409.72	1508.15		56.011	980.128
														3.48635	1406.18	1283.95	1270.46	1323.4	1319.25	1396.45	1354.23	1417.73	1442.16	1427.85	1412.72	1511.18		57.0119	982.612
														3.54759	1407.48	1284.04	1268.79	1324.18	1318.46	1396.25	1349.97	1418.61	1442.42	1427.51	1414.58	1513.1		58.011	979.534
														3.60875	1402.84	1279.68	1266.35	1321.72	1314.56	1393.23	1349.72	1412.96	1440.3	1424.53	1409.93	1506.76		59.011	980.153
														3.66986	1400.11	1276.97	1262.47	1318.38	1313.65	1390.46	1346.15	1412.12	1436.57	1419.87	1408.85	1507.43		60.0109	976.794
														3.73119	1403.71	1280.11	1266.68	1321.32	1319.03	1394.66	1350.46	1416.73	1441.7	1421.44	1411.26	1508.33		61.011	980.091
														3.79228	1403.47	1281.38	1266.77	1320.89	1314.07	1392.5	1348.21	1415.44	1439.41	1422.96	1410.71	1507.72		62.0069	974.676
														3.85333	1401.18	1281.42	1266.38	1321.97	1315.74	1393.94	1348.59	1414.75	1439.27	1424.6	1411.06	1507.43		63.0119	975.379
														3.91471	1402.03	1279.65	1264.75	1318.89	1314.01	1393.7	1347.64	1411.39	1436.98	1422.36	1409.44	1508.57		64.012	972.445
														3.97574	1393.93	1273.98	1261.79	1320.28	1310.6	1384.96	1345.21	1409.01	1434.31	1416.36	1404.47	1501.71		65.0109	975.293
														4.03682	1396.13	1277.22	1260.19	1320.01	1309.56	1390.2	1344.3	1409.19	1433.72	1416.57	1404.77	1505.16		66.0109	975.078
														4.09797	1400.45	1276.61	1259.49	1313.82	1310.15	1386.86	1343.63	1408.76	1433.98	1418.81	1406.01	1500.89		67.0109	978.116
														4.15915	1399.49	1277.43	1263.74	1316.59	1313.24	1390.82	1342.91	1411.54	1431.99	1420.22	1408.08	1505.49		68.0109	979.481
														4.22027	1406.07	1282.08	1265.51	1323.35	1317.97	1396.43	1349.36	1416.44	1440.49	1426.41	1411.83	1511.08		69.0109	972.175
														4.28151	1396.83	1279.15	1265.22	1321.38	1313.99	1390.32	1346.75	1411.74	1436.31	1423.39	1408.97	1505.13		70.012	975.524
														4.34265	1395.61	1278.46	1260.13	1320.65	1310.81	1388.05	1345.05	1411.19	1433.58	1418.04	1403.63	1505.31		71.0119	974.41
														4.4037	1397.83	1275.11	1262.86	1317.43	1310.47	1389.32	1344.68	1410.97	1436.18	1419.93	1407.9	1504.01		72.012	971.796
														4.46503	1399.47	1281.17	1264.16	1320.28	1316.18	1388.12	1345.09	1413.51	1435.65	1422.11	1406.8	1506.85		73.012	971.506
														4.52612	1399.5	1277.78	1261.85	1317.04	1315.22	1389.5	1343.48	1411.81	1434.35	1419.35	1407.49	1504.11		74.012	976.733
														4.58735	1398.45	1276.2	1263.93	1319.87	1312.6	1389.61	1344.88	1410.87	1438.77	1421.84	1405.92	1505.18		75.0119	976.859
														4.64859	1398.41	1276.44	1261.85	1317.2	1312.34	1389.04	1343.94	1409.94	1432.17	1419.21	1402.39	1503.82		76.0109	972.766
														4.70973	1393.62	1274.87	1259.2	1313.9	1308.41	1382.33	1341.57	1407.46	1430.77	1416.05	1400.8	1502.75		77.0119	973.544
														4.77078	1392.22	1275.11	1258.87	1317.38	1311.67	1384.55	1343.35	1409.16	1431.91	1416.15	1402.31	1501.31		78.0119	973.946
														4.83211	1399.53	1278.01	1265.18	1320.41	1311.55	1388.5	1346.46	1412.09	1437.42	1423.27	1405.07	1505.11		79.0119	971.028
														4.8932	1397.09	1277.84	1263.19	1317.54	1310.4	1387.19	1346.05	1411.55	1433.78	1418.82	1403.38	1500.47		80.012	974.486
														4.95423	1397.82	1274.17	1261.74	1317.89	1310.59	1388.12	1343.53	1411.31	1434.09	1418.17	1406.37	1504.53		81.0119	972.224
														5.01564	1400.38	1277.82	1265.31	1319.53	1311.32	1389.19	1346.34	1411.19	1438.19	1420.25	1408.31	1506.36		82.0119	973.807
														5.07671	1394.25	1279.7	1265.86	1323.61	1311.87	1391.07	1347.18	1413.75	1436.67	1421.64	1407.47	1506.62		83.0059	970.306
														5.13775	1396.39	1278.79	1263.41	1319.23	1312.08	1390.76	1345.97	1412	1436.05	1420.43	1406.28	1504.49		84.0119	970.707
														5.19907	1396.38	1277.28	1261.11	1319.76	1307.49	1387.6	1342.76	1410.3	1433.44	1418.05	1406.7	1502.7		85.0119	973.853
														5.2601	1392.89	1274.39	1257.8	1314.99	1308.32	1386.38	1342.13	1409.64	1431.87	1417.29	1401.2	1498.68		86.0119	969.056
														5.32122	1394.39	1270.04	1256.85	1312.34	1308.62	1386.15	1340.97	1405.06	1433.28	1417.92	1398.49	1500.59		87.0111	968.538
														5.38248	1390.81	1272.74	1256.12	1314.19	1305.08	1382.95	1338.07	1406.05	1427.94	1412.73	1399.44	1496.67		88.0109	971.268
														5.44366	1395.8	1275.86	1258.31	1316.06	1308.34	1383.09	1343.1	1409.33	1434.33	1419.71	1404.07	1500.46		89.0109	970.073
														5.50466	1391.17	1272.94	1256.8	1314.26	1305.49	1382.51	1341.07	1405.46	1431.41	1414.56	1400.52	1496.97		90.0109	972.002
														5.56581	1389.47	1272.52	1255.82	1313.02	1304.27	1385.16	1339.29	1406.01	1430.01	1413.26	1398.36	1496.45		91.0119	970.446
														5.62716	1393.7	1272.27	1257.3	1313.24	1307.61	1385.45	1341.49	1407.41	1430.12	1415.04	1400.68	1501.16		92.0109	972.373
														5.68818	1392.97	1272.94	1257.33	1314.23	1305.08	1384.15	1341.79	1406.84	1434.55	1420.16	1403.05	1500.53		93.0109	971.811
														5.74934	1391.9	1272.18	1257.83	1313.1	1306.48	1383.16	1339.91	1407.11	1430.76	1417.21	1402.4	1501.75		94.011	967.161
														5.81065	1389.63	1270.95	1256.07	1310.62	1302.99	1381.14	1340.36	1407.86	1430.46	1415.66	1400.24	1498.06		95.012	969.438
														5.87177	1389.69	1270.44	1255.88	1312.18	1306.03	1382.79	1338.55	1403.75	1428.76	1418.01	1398.42	1497.01		96.007	967.006
														5.93291	1393.97	1274.29	1261.49	1315.7	1307.84	1383.79	1343.27	1408.45	1433.88	1415.6	1405.06	1503.53		97.0119	969.673
														5.99414	1389.67	1272.7	1258.34	1314.55	1304.21	1382.89	1339.17	1405.29	1431.35	1415.45	1400.06	1501.56		98.0109	966.529
														6.05516	1388.96	1272.23	1256.18	1313.21	1302.6	1382.65	1339.18	1406.59	1428.21	1414.7	1397.21	1498.33		99.0109	966.96
														6.1163	1388.58	1270.66	1255.59	1311.4	1307.9	1381.74	1339.79	1404.7	1430.23	1413.54	1399.7	1497.24		100.011	970.81
														6.17771	1387.62	1270.37	1257.88	1312.57	1303.88	1377.49	1337.91	1401.94	1426.19	1410.9	1399.1	1493.79		101.012	973.666
														6.23867	1390.76	1273.23	1256.81	1313.67	1305.34	1382.4	1337.25	1405.75	1429.32	1412.65	1399.94	1498.39		102.012	970.287
														6.29983	1386.04	1268.44	1254.9	1311.57	1302.89	1378.01	1334.4	1399.99	1424.75	1408.49	1394.74	1494.07		103.012	963.651
														6.3611	1383.92	1269.8	1250.98	1310.06	1300.36	1378.33	1334.42	1400.68	1422.93	1409.62	1395.15	1493.2		104.012	968.89
														6.42228	1388.15	1276.48	1256.47	1318.85	1306.63	1385.38	1340.17	1403.33	1428.1	1420.17	1401.07	1502.35		105.012	963.653
														6.48341	1389.3	1268.54	1256.2	1312.48	1304.04	1380.18	1335.3	1402.27	1428.24	1411.13	1398.37	1494.98		106.012	966.762
														6.54466	1385.22	1268.89	1251.01	1310.56	1300.25	1373.83	1334.09	1401.33	1423.71	1409.6	1394.51	1493.58		107.011	968.409
														6.60568	1383.54	1267.72	1254.49	1308.28	1300.44	1376.96	1335.14	1400.82	1427.45	1409.33	1394.98	1496.27		108.006	963.186
														6.66696	1388.71	1273.49	1258.18	1314.54	1305.61	1385.22	1339.78	1408.78	1429.21	1415.7	1399.12	1499.08		109.011	965.853
														6.72813	1388.11	1271.86	1255.17	1312.81	1304.78	1379.03	1334.68	1406.63	1424.8	1410.94	1395.36	1499.48		110.011	965.921
														6.78916	1384.07	1267.5	1254.58	1309.47	1299.46	1376.84	1335.08	1400.24	1425.86	1407.9	1395.38	1494.61		111.011	967.423
														6.85027	1389.48	1268.49	1258.73	1312.23	1304.92	1383.72	1338.23	1402.72	1426.02	1410.29	1397.05	1496.14		112.012	967.186
														6.9116	1389.43	1271.02	1256.67	1311.52	1304.19	1380.83	1338.69	1405.03	1428.69	1412.88	1399.84	1499.69		113.012	966.826
														6.97265	1384.99	1267.58	1253.54	1306.41	1301.33	1379.47	1337.56	1399.87	1424.33	1409.49	1398.83	1494.59		114.012	971.891
														7.03382	1384.09	1269.61	1252.73	1310.02	1302.05	1378.4	1334.92	1400.29	1425.38	1411.76	1396.78	1491.74		115.012	969.81
														7.09513	1382.79	1266.83	1253.19	1310.74	1301.38	1377.08	1332.17	1397.89	1424.56	1407.94	1393.99	1494.89		116.012	972.732
														7.15623	1385.21	1269.54	1253.91	1311.32	1300.78	1378.56	1337.28	1403.01	1424.95	1411.51	1397.41	1496.92		117.011	969.749
														7.21742	1387.37	1270.14	1257.39	1314.23	1304.1	1381.12	1335.46	1402.31	1429.08	1412.66	1398.81	1496.18		118.012	966.06
														7.27862	1382.83	1269.23	1251.88	1308.78	1301.19	1375.39	1333.25	1400.33	1423.45	1408.98	1391.47	1489.45		119.011	962.693
														7.3396	1384.83	1264.9	1250.8	1307.46	1299.4	1374.19	1332.37	1399.05	1421.47	1407.17	1394.09	1492.88		120.011	963.185
														7.40091	1383.4	1265.82	1251.65	1309.17	1300.5	1376.9	1332.64	1397.38	1423.86	1409.41	1392.67	1492.59		121.011	966.624
														7.46201	1384.83	1266.95	1253.85	1312.6	1304.82	1376.38	1334.52	1400.56	1421.87	1411.7	1394.04	1495.41		122.011	962.763
														7.52316	1382.33	1265.87	1254.1	1308.32	1299.87	1375.57	1332.17	1397.92	1423.56	1409.85	1394.14	1490.44		123.012	966.33
														7.5843	1383.38	1269.1	1251.44	1309.12	1302.66	1376.51	1333.22	1401.66	1424.04	1408.95	1394.79	1493.1		124.012	965.242
														7.64553	1385.8	1269.2	1253.29	1310.29	1302.79	1380.42	1334.66	1399.91	1424.1	1411.68	1394.96	1492.56		125.012	970.649
														7.70665	1381.24	1267.45	1248	1308.19	1299.78	1373.88	1332	1395.76	1419.51	1409.02	1391.88	1488.75		126.012	966.232
														7.76778	1378.96	1263.09	1248.93	1305.02	1296.74	1369.98	1329.95	1395.27	1418.57	1403.01	1391.01	1486.87		127.012	969.574
														7.82891	1378.63	1262.83	1248.56	1304.7	1296.6	1371.87	1330.99	1395.5	1419.31	1403.94	1389.66	1487.24		128.012	967.711
														7.89022	1378.45	1264.69	1250.82	1303.93	1299.07	1375.47	1332.25	1400.05	1421.51	1407.08	1392.21	1489.34		129.012	966.054
														7.95134	1383.66	1268.16	1252.05	1306.91	1301.2	1376.15	1334.6	1400.59	1425.89	1407.67	1392.76	1491.44		130.051	969.23
														8.01256	1383.41	1266.67	1249.94	1308.94	1299.4	1377.59	1334.22	1400.15	1424.1	1411.08	1396.37	1493.58		131.075	967.238
														8.07368	1382.57	1266.89	1251.11	1303.83	1301.13	1379.05	1331.54	1399.98	1419.8	1408.38	1393.05	1491.37
														8.13486	1377.74	1261.15	1248.13	1301.62	1298.25	1375.81	1330.81	1397.26	1421.43	1404.6	1389.72	1488.53
														8.19601	1381.67	1266.35	1247.78	1305.03	1297.59	1372.6	1330.31	1396.14	1419.95	1404.4	1388.9	1489.23
														8.25709	1377.67	1262.91	1245.96	1301.9	1291.39	1370.48	1326.98	1395.84	1418.17	1404.13	1387.95	1483.88
														8.31833	1378.01	1262.12	1249.16	1302.84	1296.29	1370.42	1331.97	1397.38	1419.76	1404.87	1392.01	1488.69
														8.37939	1379.25	1261.7	1247.92	1299.69	1295.9	1368.52	1326.81	1393.93	1414.19	1404.2	1388.01	1487.66
														8.44067	1374.74	1264.53	1248.41	1303.72	1296.08	1371.21	1329.89	1396.9	1420.47	1403.69	1389.3	1486.68
														8.50172	1375.98	1260.68	1244.38	1299.57	1293.24	1366.7	1325.74	1395.32	1415.65	1403.94	1383.44	1484.32
														8.56291	1377.15	1265.99	1248.87	1304.03	1296.97	1369.03	1329.35	1395.97	1418.33	1403.52	1386.47	1485.4
														8.62415	1375.24	1257.95	1245.59	1301.16	1294.71	1368.12	1327.47	1395.71	1412.36	1401.81	1387.06	1484.87
														8.68532	1372.15	1256.27	1245.4	1300.48	1291.66	1367.5	1324.32	1393.84	1412.02	1400.65	1386.56	1485.33
														8.74638	1376.94	1262.79	1246.38	1301.74	1291.23	1366.31	1322.61	1391.37	1412.45	1399.83	1382.89	1481.59
														8.80763	1374.63	1260.09	1242.41	1304.86	1297.45	1367.92	1326.72	1391.73	1417.01	1401.72	1386.08	1482.6
														8.86887	1373.98	1257.96	1242.81	1298.56	1290.2	1368.1	1321.25	1391.66	1410.44	1398.79	1384.02	1483.68
														8.92991	1372.36	1256.69	1241.78	1297.2	1288.49	1363.26	1311.42	1391.01	1408.68	1399.85	1383.25	1480.59
														8.99107	1377.94	1258.29	1242.4	1300.61	1293.83	1366.71	1315.14	1391.26	1413.12	1403.03	1388.68	1487.49
														9.05235	1379.99	1260.03	1242.94	1302.28	1291.59	1369.98	1312.78	1392.32	1414.9	1405.38	1390.48	1487.08
														9.11342	1373.78	1256.12	1239.19	1297.48	1287.19	1369.58	1317.47	1392.77	1411.55	1399.44	1384.35	1483.77
														9.17451	1371.78	1254.75	1243.03	1297.5	1289.17	1363.31	1318.28	1387.64	1411.29	1395.14	1380.96	1476.51
														9.2358	1367.6	1255.54	1241.3	1293.38	1286.38	1362.19	1317.81	1386.69	1407.33	1396.2	1380.5	1477.26
														9.2969	1374.16	1260.56	1244.63	1301.21	1292.69	1371.46	1322.66	1393.61	1416.74	1398.43	1385.66	1482.02
														9.35808	1378.76	1261.4	1245.26	1300.58	1294.95	1371.37	1321.72	1399.23	1418.18	1401.88	1388.99	1485.2
														9.41925	1376.36	1262.06	1248.04	1306.49	1297.59	1372.55	1319.6	1397.96	1416.46	1403.32	1388.36	1487.08
														9.48033	1372.24	1257.1	1242.63	1295.52	1289.85	1365.53	1312.18	1391.11	1414.64	1398.33	1382.09	1480.46
														9.54161	1369.04	1255.05	1242.59	1295.23	1291.38	1365.42	1306.53	1390.97	1412.49	1397.7	1382.57	1477.54
														9.60272	1371.56	1260.47	1244.12	1299.25	1293.45	1365.87	1308.27	1393.13	1418.21	1401.81	1386.7	1482.05
														9.66387	1375.19	1256.22	1245.67	1298.56	1291.17	1366.43	1305.08	1393.6	1413.38	1402.24	1382.79	1483.24
														9.72509	1370.13	1252.15	1240.85	1296.18	1288.99	1362.7	1296.8	1386.52	1411.2	1397.77	1381.53	1475.87
														9.78617	1369.26	1256.15	1239.1	1296.74	1288.16	1364.87	1295.17	1391.66	1411.04	1396.63	1381.66	1477.48
														9.84731	1370.21	1255.36	1242.64	1296.36	1287.31	1363.71	1293.92	1386.34	1409	1396.68	1379.5	1476.46
														9.90849	1372.19	1260.22	1243.82	1298.54	1291.3	1367.81	1292.51	1389.2	1412.6	1398	1386.96	1483.47
														9.96966	1370.38	1254.88	1240.42	1296.49	1291.29	1361.78	1290.8	1387.17	1409.75	1394.96	1381.65	1477.13
														10.0308	1372.18	1256.58	1239.98	1297.04	1291.37	1364.7	1292.39	1392.55	1411.98	1397.97	1384.91	1483.29
														10.0919	1372.36	1255.5	1243.65	1300.67	1289.78	1365.09	1288.82	1389.81	1409.09	1397.11	1382.2	1477.7
														10.1532	1371.94	1258.39	1239.72	1300.05	1288.74	1366.39	1286.54	1389.91	1412.67	1397.14	1382.7	1483.72
														10.2143	1369.14	1255.9	1240.48	1297.99	1289.49	1365.46	1283.96	1388.98	1410.17	1396.43	1381.14	1479.83
														10.2754	1371.75	1257.76	1246.62	1300.08	1294.05	1366.88	1285.26	1393.3	1412.54	1400.9	1385.7	1483.14
														10.3367	1370.25	1257.02	1242.61	1300.74	1289.94	1363.78	1283.42	1390.02	1413.44	1402.18	1381.72	1482.92
														10.3979	1373.18	1257.41	1240.44	1297.27	1291	1366.26	1284.39	1391.09	1414.7	1400.16	1384.35	1483.01
														10.4589	1372.48	1254.75	1241.32	1299.1	1290.69	1366.23	1284.22	1393.36	1411.75	1397.86	1383.28	1480.69
														10.5203	1370.98	1259.62	1242.61	1300.06	1289.65	1367.07	1282.06	1392.14	1414	1398.53	1385.38	1481.27
														10.5814	1369.11	1254.49	1239.68	1296.09	1290.36	1365.17	1279.34	1391.49	1414.13	1398.33	1383.26	1480.81
														10.6423	1372.24	1256.1	1242.69	1299.93	1290.58	1366.25	1279.85	1393.28	1412.65	1397.8	1383.32	1483.4
														10.7037	1367.25	1253.44	1239.05	1294.5	1287.28	1360.33	1275.12	1385.89	1408.99	1394.2	1379.68	1474.59
														10.7649	1369.91	1252.36	1238.94	1295.99	1287.73	1361.83	1273	1389.08	1409.25	1394.4	1381.38	1479.01
														10.8259	1366.69	1251.7	1236.02	1292.95	1283.21	1361.14	1270.03	1385.88	1406.73	1391.01	1380.61	1475.1
														10.8872	1372.77	1255.3	1239.23	1297.64	1284.82	1363.62	1259.57	1390.85	1409.69	1398.1	1382.83	1480.67
														10.9483	1370.66	1253.27	1235.64	1295.14	1286.09	1362.63	1253.86	1388.22	1404.81	1399.25	1383.19	1480.48
														11.0094	1373.94	1254.98	1236.58	1298.74	1287.24	1365.41	1255.22	1387.97	1408.07	1398.49	1381.97	1482.51
														11.0707	1371.43	1252.26	1234.2	1296.98	1283.39	1361.75	1253.38	1386.99	1404.79	1400.16	1384.14	1478.28
														11.1318	1369.05	1253.8	1239.48	1296.77	1290.09	1365	1264.15	1387.16	1406.66	1395.79	1380.84	1478.01
														11.1929	1365.97	1252.71	1237.44	1293.89	1288.18	1360.78	1264.84	1386.17	1406.04	1393.36	1379.51	1474.99
														11.2541	1367.17	1254.14	1237.85	1294.83	1288.35	1360.67	1266.82	1387.59	1405.51	1394.48	1378.55	1478.6
														11.3152	1367.66	1252.14	1238.53	1296.7	1288.11	1360.45	1267.62	1386.57	1409.4	1396.18	1377.49	1475.2
														11.3763	1367.08	1252.34	1239.33	1293.97	1288.74	1362.46	1267.26	1387.11	1410.41	1391.23	1380.65	1478.78
														11.4377	1362.87	1248.47	1236.25	1290.55	1283.91	1359.09	1262.28	1381.69	1403.01	1393.72	1375.96	1471.61
														11.4987	1367.08	1250.17	1238.38	1294.26	1287.05	1364.23	1264.42	1387.28	1406.73	1393.24	1379.3	1478.4
														11.56	1365.67	1253.92	1239.43	1293.84	1287.4	1363.9	1260.89	1382.14	1404.32	1393.09	1378.17	1476.11
														11.6213	1365.19	1255.73	1241.54	1296.94	1286.48	1360.72	1263.35	1385.68	1403.51	1393.85	1380.87	1478.7
														11.6823	1369.99	1253.15	1241.05	1295.54	1287.45	1366.03	1264.83	1387.96	1407.1	1398	1383.46	1475.89
														11.7434	1364.97	1253.61	1238.5	1295.03	1287.11	1361.92	1260.43	1388.59	1406.31	1394.23	1381.49	1477.95
														11.8047	1366.23	1252.46	1238.38	1297.18	1286.25	1361.63	1260.73	1383.99	1399.98	1394.16	1377.93	1472.93
														11.8657	1364.68	1246.28	1233.21	1292.33	1282.99	1356.84	1256.04	1381.75	1399.3	1388.64	1374.51	1474.1
														11.927	1361.61	1247.32	1231.31	1290.55	1284.32	1352.49	1254.57	1383.27	1396.22	1387.38	1371.9	1469.5
														11.9879	1364.05	1250.55	1233.26	1295.31	1284.85	1361.14	1258.39	1383.57	1401.31	1391.67	1378.21	1470.43
														12.0492	1365.07	1248.42	1233.16	1293.85	1283.59	1357.22	1257.28	1383.7	1399.29	1394.26	1377.77	1470.37
														12.1104	1364.88	1251.22	1234.48	1295.24	1288.74	1359.54	1256.07	1383.2	1395.62	1395.97	1379.73	1472.18
														12.1716	1363.49	1252.13	1235	1294.21	1288.48	1359.78	1256.55	1383.14	1396.3	1394.69	1378.06	1472.05
														12.2328	1366.57	1248.89	1235.55	1293.15	1285.28	1359.63	1258.32	1384.94	1392.22	1392.4	1375.51	1467.22
														12.2938	1360.58	1246.14	1230.74	1292.47	1284.44	1357.2	1253.77	1378.26	1390.39	1390.99	1374.98	1465.23
														12.355	1360.74	1248.37	1232.34	1292.62	1283.5	1356.86	1255.67	1379.6	1388.51	1389.6	1374.95	1468.91
														12.4164	1363.33	1250.6	1232.48	1294.35	1288.48	1358.75	1256.66	1384.33	1387.94	1395.29	1380.09	1472.18
														12.4774	1362.43	1250.78	1233.45	1290.13	1284.96	1355.23	1255.61	1379.09	1380.96	1386.87	1375.98	1470.96
														12.5384	1357.32	1244.27	1229.14	1285.48	1284.58	1353.99	1252.31	1376.13	1375.88	1385.16	1369.9	1463.13
														12.5998	1356.77	1248.12	1231.23	1288.91	1283.13	1351.34	1254.69	1378.98	1372.61	1386.05	1373.68	1466.61
														12.6608	1357.47	1245.84	1231.09	1288.56	1285.54	1355.83	1253.67	1376.43	1361.57	1387.92	1373.29	1462.18
														12.722	1358.66	1247.23	1231.84	1289.57	1287.76	1356.51	1256.14	1380.61	1362.98	1390.73	1372.94	1469.17
														12.7833	1359.97	1248.09	1230.35	1287.39	1287.36	1355.29	1253.69	1378.36	1356.99	1385.55	1373.06	1465.88
														12.8444	1360.64	1249.59	1233.74	1291.44	1288.05	1353.07	1255.32	1379.62	1355.3	1389.65	1372.71	1465.83
														12.9055	1360.16	1248.89	1234.14	1293.38	1290.13	1355.98	1255.89	1380.38	1349.14	1389.64	1377.46	1470.33
														12.9667	1359.25	1251.28	1233.03	1291.42	1288.19	1355.19	1256.14	1377.48	1347.32	1389.91	1372.94	1465.76
														13.0279	1360.06	1248.35	1230.88	1289.17	1286.68	1351.34	1253.52	1376.87	1341.16	1387.11	1373.98	1462.13
														13.089	1362.16	1250.08	1233.41	1293.56	1289.46	1358.72	1257.16	1380.47	1342.58	1391.55	1376.14	1468.77
														13.1502	1362.77	1253.95	1236.37	1294.34	1291.71	1357.67	1260.21	1383.33	1343.76	1393.67	1376.86	1468.36
														13.2113	1360.93	1249.5	1233.09	1288.13	1289.82	1352.8	1253.63	1378.74	1336.98	1388.2	1374.41	1463.38
														13.2725	1359.47	1247.94	1232.82	1289.9	1290.39	1352.14	1254.38	1379.92	1337	1390.76	1372.08	1462.3
														13.3336	1362.6	1253.89	1237.09	1293.98	1295.14	1360.08	1258.04	1378.49	1338.25	1390.19	1374.83	1466.94
														13.3948	1358.42	1249.83	1233.56	1289.73	1292.52	1354.35	1253.67	1379.11	1334.91	1388.85	1372.47	1464.18
														13.4559	1357.84	1248.96	1235.23	1286.72	1289.46	1352.2	1254	1375.61	1334.22	1384.49	1369.41	1457.84
														13.5171	1358.47	1251.86	1233.2	1290.03	1292.82	1355.62	1254.34	1378.45	1334.92	1388.31	1373.47	1458.74
														13.5783	1356.21	1251.04	1233.63	1286.47	1291.47	1350.61	1253.3	1374.79	1332.06	1384.1	1369.28	1457.34
														13.6395	1355.47	1249.84	1232.05	1288.52	1290.92	1349.13	1251.73	1372.59	1329.42	1385.75	1369.47	1451.66
														13.7007	1354.67	1247.85	1229.67	1284.04	1289.75	1347.08	1251.18	1374.26	1329.86	1381.78	1367.88	1450.83
														13.7617	1353.73	1245.21	1230.98	1286.28	1288.49	1348.83	1249.03	1371.32	1329.88	1382.25	1367.32	1448.59
														13.8229	1353.23	1247.98	1232.78	1288.13	1290.32	1347.17	1250.68	1373.39	1331.41	1382.83	1366.68	1449.26
														13.8842	1352.61	1247.69	1231.82	1281.44	1289.98	1345.2	1247.18	1367.26	1324.56	1380.28	1364.54	1445.46
														13.9453	1353.91	1245.68	1233.03	1284.55	1289.86	1348	1250.99	1370.47	1329.24	1381.64	1364.76	1446.01
														14.0064	1357.74	1245.21	1231.42	1282.77	1289.06	1343.84	1249.37	1368.91	1329.31	1382.1	1367.62	1441.72
														14.0675	1354.4	1248.53	1232.16	1286.11	1290	1342.05	1249.76	1369.85	1325.61	1382.05	1368	1439.86
														14.1287	1354.09	1250.52	1235.54	1288.44	1293.47	1346.11	1254.22	1370.6	1329.39	1383.35	1370.53	1438.28
														14.1899	1352.53	1247.14	1233.77	1284.13	1288.49	1339.42	1249.22	1366.3	1326.4	1383.94	1368.79	1431.18
														14.251	1354.33	1248.51	1234.02	1285.79	1289.29	1337.63	1249.25	1365.5	1325.44	1383.84	1371.05	1425.27
														14.3122	1356.1	1249.96	1232.46	1288.7	1292.02	1340.49	1254.6	1368.92	1329.47	1385.53	1371.61	1423.26
														14.3734	1355.55	1249.55	1233.28	1287.53	1289.69	1338.14	1251.14	1361.51	1327.27	1384.91	1371.28	1414.49
														14.4345	1349.53	1243.21	1228.15	1281.27	1282.04	1325.59	1246.49	1360.08	1321.24	1377.67	1362.09	1403.53
														14.4957	1351.54	1246.36	1228.36	1281.28	1284.37	1323.12	1248.66	1354.83	1322.84	1376.84	1363.95	1399.9
														14.5569	1353.43	1246.41	1233.04	1285.94	1289.27	1323.13	1249.91	1354.48	1325.04	1382.5	1367.18	1398.1
														14.618	1356.12	1248.41	1234.55	1285.58	1288.17	1318.3	1250.84	1352.56	1322.64	1379.98	1369.79	1395.85
														14.6792	1356.95	1249.44	1232.06	1283.75	1288.05	1314.31	1251.08	1346.15	1326.32	1380.16	1368.17	1393.27
														14.7404	1350.25	1242.5	1231.25	1280.16	1288.62	1306.3	1244.24	1335.59	1320.45	1380.08	1364.86	1388.5
														14.8015	1351.2	1247.78	1234.04	1283.28	1288.23	1308.88	1247.59	1337.07	1321.03	1381.56	1367.69	1387.51
														14.8628	1353.5	1246.92	1234.4	1284.22	1286.64	1305.69	1250.17	1332.89	1324.9	1381.99	1365.41	1389.4
														14.9238	1356.58	1250.23	1234.15	1284.18	1291.16	1304.07	1249.31	1330.17	1322.68	1380.68	1364.13	1385.1
														14.9851	1351.09	1248.78	1232.49	1281.58	1288.28	1300.07	1249.01	1325.27	1320.91	1379.86	1362.32	1384.99
														15.0463	1353.38	1247.8	1231.1	1282.86	1287.2	1300.61	1248.32	1324.41	1321.8	1379.25	1361.34	1383.71
														15.1075	1354.46	1248.26	1229.16	1282.73	1287.94	1299.01	1249.9	1322.66	1319.85	1378.99	1362.67	1381.99
														15.1685	1353.63	1249.92	1234.83	1286.68	1289.5	1301.93	1251.61	1322.46	1323.94	1377.55	1365.28	1384.34
														15.2298	1354.39	1249.57	1232.76	1283.26	1287.02	1296.28	1248.29	1322.4	1322.17	1380.73	1365.72	1382.4
														15.2908	1354.65	1248.24	1234.68	1285.15	1289.86	1296.74	1250.89	1322.33	1323.02	1382.82	1363.75	1381.7
														15.352	1353.56	1248.63	1231.75	1284.03	1290.73	1292.37	1250.32	1319	1318.33	1380.84	1364.42	1381.34
														15.4133	1348.97	1244.8	1228.39	1282.51	1285.01	1290.85	1246.88	1312.56	1315.96	1375.85	1356.82	1376.1
														15.4743	1350.79	1241.9	1229.1	1279.26	1286.17	1290.93	1246.96	1314.94	1318.02	1377.42	1357.11	1374.48
														15.5355	1352.85	1244.79	1228.16	1281.74	1284.97	1291.94	1246.04	1314.04	1317.04	1377.94	1360.41	1373.75
														15.5968	1350.8	1246.32	1229.43	1281.31	1285.5	1292.27	1248.28	1313.46	1315.36	1376.7	1359.71	1372.9
														15.6579	1344.44	1240.74	1225.32	1275.8	1280.98	1285.98	1242.63	1306.85	1308.18	1370.22	1350.32	1365.24
														15.7189	1350.54	1243.58	1227.56	1280.89	1283.99	1289.07	1246.09	1312.32	1312.73	1373.86	1355.67	1370.79
														15.7802	1351.57	1250.21	1233.34	1283.53	1288.36	1291.64	1249.84	1312.23	1317.9	1383.96	1361.7	1373.86
														15.8414	1349.77	1245.48	1230.61	1279.71	1284.67	1289.84	1247.34	1311.38	1315.77	1375.16	1357.73	1369.91
														15.9025	1350.91	1245.18	1229.63	1281.73	1284.58	1289.66	1248.56	1310.33	1314.98	1377.18	1357.04	1370.97
														15.9637	1348	1248.1	1232.3	1281.23	1283.99	1290.36	1248.38	1310.67	1316.21	1375.24	1356.47	1367.85
														16.0248	1351	1246.27	1230.47	1280.66	1280.1	1287.85	1249.04	1307.65	1312.74	1376.08	1355.75	1366.39
														16.0859	1348.89	1244.18	1228.3	1280.27	1280.95	1284.37	1245.76	1307.16	1310.93	1372.82	1350.21	1364.67
														16.147	1347.13	1243.34	1228.66	1275.74	1277.64	1283.49	1244.91	1301.62	1311.5	1369.45	1350.6	1362.47
														16.2084	1349.05	1245.6	1229.75	1280.54	1280.43	1284.46	1246.25	1302.29	1314.23	1374.92	1350.04	1364.4
														16.2694	1347.22	1248.59	1230.62	1280.91	1277.99	1285.78	1247.12	1302.24	1312.47	1374.79	1347.41	1361.68
														16.3306	1350.62	1245	1227.5	1280.94	1277.99	1284.63	1244.83	1303.14	1311.82	1376.43	1344.6	1361.05
														16.3919	1348.44	1243.37	1231.1	1282.68	1277.02	1285.99	1246.34	1301.02	1311.99	1373.39	1342.27	1358.71
														16.453	1344.59	1240.62	1225.06	1273.96	1268.49	1277.58	1241.12	1298.56	1308.11	1371.09	1337.79	1356.75
														16.5141	1343.08	1241.91	1227.5	1276.91	1269.99	1280.65	1241.48	1297.44	1308.25	1372.08	1339.38	1353.2
														16.5754	1348.97	1239.41	1226.22	1278.03	1267.65	1281.9	1241.65	1291.68	1305.87	1374.56	1336.22	1353.16
														16.6364	1349.26	1246.94	1231.9	1280.72	1270.36	1284.11	1244.58	1295.65	1306.78	1373.6	1334.9	1354.33
														16.6976	1350.37	1243.6	1226.92	1282.92	1264.08	1284.74	1245.95	1293.84	1309.28	1374.55	1336.18	1357.56
														16.7588	1348.03	1243.94	1228.93	1277.65	1263.21	1280.2	1242.88	1291.86	1310.39	1372.62	1331.22	1351.93
														16.8199	1346.55	1242.46	1227.44	1278.37	1260.76	1282.97	1244.16	1290.76	1308.34	1370.18	1325.69	1349.02
														16.881	1346.57	1242.33	1226.71	1276.07	1256.86	1278.66	1241.79	1288.52	1305.2	1367.89	1320	1347.22
														16.9423	1343.76	1241.53	1226.48	1277.19	1252.49	1275.58	1241.4	1286.6	1305.88	1369.47	1315.3	1348.7
														17.0034	1346.9	1244.54	1227.45	1278.92	1251.86	1278.98	1242.32	1288.29	1306.72	1370.13	1314.37	1347.32
														17.0645	1344.88	1243.8	1225.05	1278.49	1251.88	1280.52	1243.92	1289.41	1308.42	1370.67	1314.31	1346.73
														17.1257	1347.26	1240.19	1228.36	1278.62	1251.24	1278.9	1242.48	1284.62	1306.33	1372.1	1310.1	1345.18
														17.1869	1345.16	1241.35	1226.33	1276.86	1246.96	1278.33	1242.89	1286.54	1305.62	1370.1	1308.73	1345
														17.248	1346.7	1244.14	1228.27	1277.33	1247.88	1281.95	1245.25	1285.74	1306.11	1368.12	1306.05	1344.54
														17.3093	1342.37	1237.05	1224.97	1272.92	1243.17	1275.21	1240.78	1280	1302.1	1368.62	1303.03	1337.58
														17.3704	1344.14	1237.9	1221.89	1275.53	1239.79	1275.64	1240.63	1278.2	1301.81	1368.4	1302.68	1336.06
														17.4316	1344.56	1238.67	1221.66	1276.47	1240.09	1272.75	1240.26	1282.53	1302.1	1366.35	1300.72	1337.38
														17.4927	1346.46	1242.69	1226.45	1278.23	1244.99	1278.35	1243.78	1284.28	1304.41	1372.31	1304.2	1342.38
														17.5539	1345.43	1239.87	1226.79	1277.39	1241.7	1277.07	1243.92	1280.15	1303.97	1371.47	1301.62	1340.87
														17.615	1346.09	1241.77	1225.26	1277.2	1240.96	1277.12	1243.53	1279.74	1303.85	1369.22	1302.48	1338.9
														17.6763	1347.94	1248.32	1225.97	1280.81	1242	1281.52	1246.59	1280.08	1303.8	1372.61	1303.35	1338.61
														17.7375	1347.34	1241.64	1225.39	1279.23	1241.41	1277.97	1244.09	1278	1304.63	1369.43	1299.09	1335.21
														17.7985	1340.04	1236.8	1217.72	1272.31	1235.59	1270.85	1239.09	1273.23	1296.16	1362.62	1291.72	1328.88
														17.8598	1339	1235.72	1218.18	1269.89	1233.32	1267.51	1234.65	1273.2	1297.2	1362.87	1291.89	1323.3
														17.921	1346.91	1243.34	1226.47	1278.65	1240.36	1274.89	1242.84	1278.91	1301.37	1369.32	1299.06	1332.59
														17.982	1347.16	1245.52	1228.25	1280.67	1243.79	1276.4	1244.88	1277.07	1304.84	1370.77	1299.24	1333.38
														18.0433	1342.1	1240.52	1222.14	1276.42	1238.07	1272.93	1238.75	1273.06	1300.21	1364.76	1295.15	1327.88
														18.1044	1341.69	1237	1224.36	1273.1	1238.17	1272.63	1241.02	1273.36	1301.91	1367.76	1292.42	1328.77
														18.1655	1338.08	1237.37	1219.55	1271.56	1234.73	1267.1	1236.95	1269.66	1297.47	1363.27	1289.31	1324.67
														18.2268	1341.58	1238.33	1221.94	1274.11	1233.01	1270.19	1239.38	1273.91	1299.29	1364.38	1291.63	1323.59
														18.2879	1340.56	1238.66	1222.91	1272.65	1235.82	1272.5	1239.94	1270.86	1298.48	1365.6	1289.96	1327.67
														18.3491	1339.59	1238.54	1224.38	1272.98	1234.72	1266.86	1240.47	1273.46	1298.19	1362.17	1289.18	1323.27
														18.4102	1338.46	1236.4	1222.13	1272.22	1233.08	1270.28	1237.85	1272.1	1296.98	1364.05	1290.28	1322.02
														18.4715	1342.08	1236.41	1220.68	1273.66	1234.21	1268.79	1238.99	1270.77	1300.79	1361.48	1291.25	1319.85
														18.5325	1343.58	1237.38	1221.26	1272.78	1234.43	1268.03	1240.95	1273.57	1299.56	1367.61	1291.53	1324.8
														18.5936	1346.82	1244.53	1225.84	1277.91	1236.83	1271.21	1243.02	1276.61	1303.35	1364.07	1294.8	1321.79
														18.6549	1347.3	1243.42	1226.61	1279.53	1238.23	1273.45	1244.65	1274.87	1302.82	1370.17	1294.57	1327.51
														18.716	1344.14	1236.76	1222.39	1271.38	1231.61	1271.67	1239.21	1271.42	1300.78	1365.6	1289.47	1320.14
														18.7771	1337.09	1236.37	1219.94	1271.59	1228.37	1266.99	1234.33	1266.99	1292.46	1361.39	1285.54	1314.5
														18.8384	1341.96	1236.62	1222.24	1273.08	1232.79	1268.19	1238.18	1269.09	1300.36	1363.49	1289	1317.31
														18.8994	1341.54	1236.42	1224.52	1277.23	1233.58	1272.42	1239.52	1271.65	1299.3	1368.54	1287.99	1316.34
														18.9607	1341.02	1238.94	1222.71	1277.35	1234.71	1273.17	1239.81	1271.54	1302.76	1365.53	1292.54	1319.5
														19.0219	1341.29	1239.16	1223.67	1271.8	1235.65	1268.21	1238.81	1269.83	1301.18	1364.73	1290.27	1315.83
														19.083	1339.62	1238.02	1220.95	1272.47	1230.96	1267.46	1237.97	1269.99	1296.51	1363.77	1286.16	1313.39
														19.1441	1346	1241.64	1225.14	1276.84	1233.87	1273.7	1242.93	1274.04	1300.56	1367.54	1291.09	1320.14
														19.2054	1340.14	1242.72	1224.79	1275.53	1234.96	1267.07	1241.02	1272.72	1301.41	1364.49	1289.94	1315.81
														19.2664	1341.91	1238.17	1222.62	1272.61	1232.75	1267.06	1240.25	1269.84	1296.67	1363.74	1287.63	1314.56
														19.3276	1339.23	1235.22	1218.11	1269.76	1226.06	1267.65	1236.92	1267.1	1294.99	1362.03	1285.15	1310.62
														19.3889	1339.38	1233.95	1218.11	1271.24	1228.69	1266.89	1238.54	1265.38	1295.17	1358.95	1284.72	1308.97
														19.4499	1343.21	1239.67	1224.74	1272.29	1232.62	1268.44	1239.82	1273.51	1300.38	1365.76	1289.99	1316.05
														19.511	1339.96	1240.25	1220.69	1275.06	1237.21	1268.55	1241.6	1272.46	1298.36	1364.65	1288.03	1310.7
														19.5723	1338.63	1236.6	1220.03	1271.03	1228.35	1266.9	1236.49	1266.54	1295.57	1361.53	1285.9	1306.61
														19.6334	1340.42	1235.86	1219.92	1270.07	1228.65	1267.69	1237.24	1268.43	1296.71	1365.16	1286.02	1309.6
														19.6946	1339.95	1239.66	1222.85	1274.96	1232.39	1270.84	1239.5	1270.69	1297.68	1363.6	1288.37	1311.91
														19.7558	1340.72	1238.45	1221.67	1273.32	1231.17	1268.87	1239.55	1269.84	1297.05	1361.41	1286.58	1309.9
														19.8169	1341.02	1235.29	1221.66	1271.75	1228.98	1266.98	1238.93	1265.91	1294.78	1360.62	1284.33	1311.2
														19.878	1344.55	1239.28	1224.51	1274.5	1232.53	1271.62	1241.43	1274.17	1298.75	1363.29	1288.01	1314.05
														19.9394	1339.65	1238.74	1222.93	1272.51	1230.19	1269.74	1239.33	1270	1298.01	1362.86	1285.01	1309.37
														20.0004	1341.4	1235.72	1218.04	1271.94	1229.77	1264.49	1237.47	1268.64	1295.86	1362.07	1284.57	1309.06
														20.0615	1337.94	1234.81	1217.25	1267.93	1225.54	1262.28	1237.44	1267.51	1292.57	1358.93	1281.05	1305.97
														20.1228	1341.73	1236.59	1221.07	1270.55	1229.72	1266.98	1238.56	1268.76	1297.83	1364.89	1283.15	1309.67
														20.1839	1337.52	1235.37	1221.21	1270.02	1230.29	1266.35	1238.29	1267.93	1292.56	1358.39	1283.81	1305.38
														20.2451	1340.64	1237.02	1222.05	1269.61	1230.34	1266.41	1238.48	1268.91	1298.34	1361.78	1283.94	1310.83
														20.3063	1337.06	1234.86	1218.59	1269.14	1226.05	1265.45	1236.51	1266.6	1294.13	1360.72	1284.19	1305.8
														20.3674	1336.91	1232.55	1218.59	1270.49	1227.77	1264.9	1237.09	1270.09	1295.44	1359.38	1284.17	1306.04
														20.4286	1336.09	1232.74	1215.88	1267.32	1222.02	1260.66	1235.24	1264.15	1293.79	1357.78	1282.54	1305.32
														20.4897	1337.53	1234.33	1221.7	1269.54	1227.6	1267.4	1237.05	1269.02	1296.09	1359.2	1283.73	1304.29
														20.5509	1337.92	1235.99	1215.56	1266.52	1226.16	1265.29	1236.36	1268.38	1294.99	1359.41	1285.09	1303.37
														20.612	1338.69	1234.64	1218.01	1269.17	1224.93	1265.66	1237.73	1267.84	1295.33	1358.22	1282	1308.11
														20.6731	1334.47	1233.46	1214.44	1267.28	1225.05	1265.65	1233.26	1264.86	1293.21	1357.49	1280.37	1301.93
														20.7344	1338.07	1232.53	1215.95	1266.04	1227.57	1265.63	1236.81	1268.24	1292.64	1360.35	1280.26	1304.8
														20.7956	1333.72	1233.15	1219.29	1267.85	1223.39	1264.26	1233.74	1268.31	1292.22	1355.65	1280.13	1301.23
														20.8567	1338.57	1232.96	1218.5	1267.64	1223.55	1264.41	1233.48	1266.95	1293.4	1358.84	1278.59	1301.41
														20.9179	1336.45	1231.44	1219.09	1267.91	1227.53	1263.28	1234.33	1267.95	1295.85	1356.44	1282.57	1303.01
														20.979	1337.6	1233.78	1218.97	1269.97	1230.11	1267.33	1237.71	1269.57	1294.4	1359.29	1283.85	1304.13
														21.0401	1336.94	1235.08	1215.07	1268.62	1223.95	1267.86	1235.73	1266.96	1295.05	1360.88	1284.15	1303.84
														21.1013	1337.14	1235.87	1217.61	1267.09	1224.48	1262.76	1233.7	1267.05	1295.65	1357.57	1281.22	1302.02
														21.1625	1332.14	1231.74	1216.73	1268.34	1224.17	1260.88	1233.85	1267.44	1290.82	1353.85	1277.36	1300.92
														21.2236	1337.18	1231.67	1215.04	1266.02	1222.61	1266.2	1232.87	1264.03	1291.86	1355.8	1283.72	1300.9
														21.2848	1330.3	1231.13	1216.61	1262.02	1218.58	1259.63	1230.19	1262.37	1288.79	1352.36	1277.25	1295.69
														21.346	1332.41	1230.38	1212.93	1264.12	1218.95	1261.31	1230.13	1262.37	1291.31	1353.89	1276.1	1297.04
														21.4071	1333.58	1231.91	1215.65	1266.57	1223.26	1263.45	1235.78	1266.47	1290.69	1354.77	1280.06	1300.22
														21.4684	1336.94	1233.7	1216.4	1266.96	1224.62	1265.44	1235.66	1268.16	1290.99	1357.6	1283.19	1302.99
														21.5295	1332.32	1231.5	1213.94	1266.67	1221.37	1262.89	1231.45	1266.64	1291.58	1354.66	1277.35	1299.7
														21.5907	1330.61	1229.16	1214.45	1263.99	1219.61	1263.45	1232.25	1265.25	1287.07	1353.82	1277.2	1297.51
														21.6518	1335.91	1231.26	1214.42	1267	1223.46	1265.47	1235.32	1265.39	1294.14	1355.67	1281.09	1300.27
														21.7131	1336.03	1236.85	1220.45	1269.29	1227.18	1269.07	1236.26	1269.55	1295.39	1362.05	1283.28	1304.63
														21.7743	1333.39	1232.3	1215.75	1267.83	1222.59	1264.77	1234.81	1266.77	1292.33	1354.88	1281.84	1299.6
														21.8355	1331.93	1230.79	1215.64	1265.36	1223.6	1263.22	1232.86	1266.66	1293.35	1354.35	1281.09	1297.55
														21.8965	1334.48	1231.19	1217.42	1268.99	1225.22	1264.98	1233.98	1267.57	1292.9	1359.23	1281.94	1301.15
														21.9576	1328.51	1226.92	1210.33	1263.14	1218.77	1261.5	1227.1	1263.97	1286.7	1348.25	1276.33	1293.1
														22.0189	1330.41	1226.99	1211.14	1263.45	1221.3	1264.27	1229.04	1264.13	1287.96	1352.99	1279.39	1297.2
														22.08	1327.93	1224.57	1213	1262.87	1216.97	1260.72	1228.84	1264.61	1288.15	1350.58	1276.08	1295.59
														22.1411	1331.99	1228.94	1214.14	1262.9	1219.87	1262.54	1233.11	1266.75	1288.16	1354.28	1279.46	1297.37
														22.2023	1333.06	1230.58	1215.38	1266	1220.77	1266.1	1232.76	1269.67	1293.22	1355.05	1278.67	1299.97
														22.2634	1332.31	1232.94	1216.47	1267.45	1221.31	1264.06	1234.16	1266.98	1289.9	1354.86	1281.37	1297.02
														22.3246	1332.76	1230.39	1212.85	1261.75	1219.38	1262.99	1233.1	1267.34	1291.47	1353.99	1279.96	1294.9
														22.3857	1335.29	1233.17	1214.83	1266.42	1222.85	1267.5	1235.17	1269.78	1292.18	1356.05	1281.83	1299.71
														22.4469	1333.52	1230.72	1213.29	1265.01	1222.77	1265.76	1232.35	1266.34	1292.36	1355.98	1281.16	1300.7
														22.5081	1333.83	1233.05	1214.15	1266.9	1222.84	1266.44	1232.95	1266.64	1291.5	1355.96	1282.89	1298.24
														22.5692	1330.62	1229.62	1212.04	1267.31	1217.65	1264.56	1234.29	1267.83	1291	1353.7	1281	1298.03
														22.6305	1328.89	1225.14	1207.49	1262.75	1220.05	1259.8	1229.08	1263.24	1286.69	1353.62	1278.42	1292.87
														22.6917	1327.26	1224.23	1207.73	1262.14	1218	1258.47	1230.08	1262.39	1286.54	1350.05	1277.33	1294.2
														22.7528	1328.29	1228.72	1209.13	1262.24	1218.09	1261.88	1231.45	1265.3	1284.84	1352.62	1280.31	1294.12
														22.814	1330.06	1228.64	1210.17	1263.87	1219.89	1262.66	1232.41	1266.82	1288.32	1352.3	1276.06	1295.85
														22.875	1334.26	1231.9	1214.28	1262.87	1220	1265.68	1233.93	1268.72	1291.36	1351.2	1283.04	1297.84
														22.9362	1327.81	1227.17	1210.7	1262.38	1218.66	1261.92	1229.52	1265.99	1287.06	1347.56	1277.33	1292.8
														22.9975	1332.48	1228.47	1211.85	1266.7	1219.97	1265.74	1230.53	1267.66	1288.74	1351.95	1278.39	1295.47
														23.0586	1330.42	1228.88	1207.99	1261.84	1217.39	1261.77	1230.15	1263.82	1286.1	1348.84	1276.32	1294.8
														23.1197	1332.15	1229.66	1210.41	1264.06	1217.73	1264.64	1232.46	1267.52	1290.64	1352	1281.13	1295.29
														23.181	1329.85	1228.26	1209.45	1264.53	1217.6	1262.21	1229.76	1267.89	1288.21	1350.45	1279.81	1296.38
														23.242	1327.55	1225.99	1208.57	1260.67	1215.91	1261.59	1228.79	1263.71	1287.57	1349.67	1276.83	1294.39
														23.3031	1327.67	1229.67	1211.04	1260.84	1218.52	1262.9	1232.29	1265.8	1288.16	1347.75	1276.94	1293.29
														23.3644	1329.79	1226.83	1211.5	1265.97	1221.23	1264.6	1227.42	1266.68	1288.4	1348.43	1278.72	1294.3
														23.4257	1328.5	1226.4	1210.95	1259.12	1217.18	1260.64	1228.05	1266.84	1283.61	1346.54	1278.18	1294.61
														23.4867	1326.82	1224.56	1209.35	1261.67	1213.48	1262.52	1226.45	1265.54	1282.6	1345.47	1278.13	1292.47
														23.5479	1326.27	1222.73	1206.53	1259.75	1214.02	1261.21	1227.24	1264.62	1285.16	1349.83	1276.08	1291.43
														23.609	1328.07	1226.95	1208.03	1260.75	1216.29	1263.94	1230.16	1265.21	1287.68	1350.12	1278.96	1295.02
														23.6701	1326.54	1222.08	1208.74	1259.63	1215.61	1262.97	1227.62	1266.09	1287.15	1347.71	1277.78	1293.16
														23.7314	1327.51	1224.54	1205.38	1259.86	1214.94	1260.56	1227.64	1267.8	1286.44	1348.12	1278.31	1291.69
														23.7925	1327.98	1225.63	1205.92	1261.62	1216.8	1261.57	1228.88	1267.26	1286.49	1347.02	1277.71	1294.36
														23.8537	1326.09	1225.92	1210.54	1262.81	1217.36	1261.94	1230.16	1267.4	1287.96	1348.96	1279.42	1295.63
														23.915	1326.68	1223.29	1207.31	1260.98	1217.3	1263.41	1229.97	1267.12	1286.36	1348.48	1277.78	1292.43
														23.976	1324.81	1227.16	1210.32	1262.06	1217.95	1265.62	1230.01	1268.43	1286.34	1350.74	1278.06	1295.52
														24.0372	1327.85	1224.26	1211.45	1261.7	1218.67	1260.69	1229.71	1267.09	1287.62	1349.4	1278.31	1295.51
														24.0985	1326.48	1223.56	1207.74	1263.02	1217.05	1266.47	1229.45	1267.81	1287.8	1349.84	1280.3	1295.51
														24.1595	1327.16	1220.21	1206.86	1261.71	1215.95	1262.92	1227.94	1266.26	1285.13	1347.78	1275.57	1292.61
														24.2206	1331.23	1226.3	1209.96	1263.28	1216.46	1264.78	1228.61	1267.34	1288.05	1346.58	1282.03	1297.26
														24.2818	1327.59	1226.18	1208.1	1260.92	1216.3	1263.39	1230.48	1271.41	1287.56	1347.09	1279.7	1294.53
														24.343	1321.94	1222.78	1206.08	1260.53	1216.45	1262.78	1225.19	1265.76	1282.95	1344.32	1276.63	1291.3
														24.4041	1322.5	1220.87	1205.2	1257.24	1211.57	1259.71	1225.38	1264.46	1284.09	1343.26	1274.93	1289.6
														24.4653	1322.92	1225.88	1205.61	1262.88	1215.62	1265.19	1227.76	1267.16	1285.74	1346.3	1283.03	1294.85
														24.5265	1324.76	1223.13	1203.84	1259.42	1216.41	1260.42	1225.39	1265.22	1282.37	1343.46	1276.67	1291.16
														24.5876	1320.69	1221.48	1203.1	1258.77	1214.28	1259.84	1225.26	1264.28	1282.17	1347.19	1277.88	1289.78
														24.6487	1323.62	1222.71	1207.11	1259.95	1212.23	1263.74	1225.41	1269.28	1283.68	1343.55	1278.32	1292.74
														24.7099	1325.4	1224.35	1206.1	1261.68	1217.66	1263.54	1225.99	1268.49	1286.83	1349.2	1280.26	1291.08
														24.7711	1321.67	1221.9	1204.82	1257.82	1210.47	1258.97	1224.27	1266.67	1284.11	1343.3	1275.08	1289.72
														24.8323	1322.52	1221.2	1202.39	1256.05	1211.29	1262.21	1226.73	1264.79	1279.16	1345.65	1277.44	1288.51
														24.8936	1324.13	1220.93	1203.8	1257.83	1213.39	1261.1	1222.9	1264.47	1282.2	1344.35	1278.34	1290.85
														24.9546	1325.63	1221.64	1202.7	1259.37	1216.6	1262.7	1225.57	1268.99	1283.35	1349.02	1282.55	1292.7
														25.0157	1322.72	1221.25	1203.74	1258.54	1214.23	1258.76	1225.49	1266.93	1284.39	1344.76	1278.55	1292.01
														25.0768	1325	1222.44	1202.83	1259.15	1213.11	1262.61	1226.8	1268.19	1284.42	1345.92	1281.5	1293.17
														25.1381	1323.71	1223.19	1203.26	1259.56	1215.84	1263.52	1226.09	1266.27	1284.76	1346.73	1281.62	1292.38
														25.1994	1320.95	1220.77	1202.39	1259.8	1213.41	1261.85	1224.04	1265.84	1279.82	1343.67	1277.11	1292.25
														25.2605	1318.27	1216.97	1201.62	1254.61	1212	1259.96	1223.35	1266.11	1282.25	1342.79	1276.65	1288.03
														25.3216	1322.25	1218.5	1201.98	1257.67	1212.62	1261.94	1224.32	1266.98	1283.9	1343.87	1280.6	1286.63
														25.3829	1322.55	1221.22	1204.83	1257.04	1213.6	1261.45	1225.14	1265.29	1281.74	1343.45	1278.98	1292.6
														25.4441	1321.66	1215.83	1202.05	1256.78	1212.97	1258.94	1223.79	1265.78	1279.31	1344.28	1278.29	1292.37
														25.5051	1318.91	1221.53	1199.66	1255.77	1212.6	1258.13	1221.95	1264.81	1279.86	1343.66	1276.81	1291.21
														25.5662	1322.29	1220.63	1204.58	1261.33	1215.77	1261.43	1227.78	1269.64	1284.4	1350.25	1283.41	1291.27
														25.6275	1320.39	1216.5	1201.15	1255.8	1212.88	1261.82	1223.5	1264.38	1280.6	1342.5	1277.67	1288.37
														25.6885	1317.8	1212.91	1200.33	1253.23	1206.85	1257.09	1221.21	1261.85	1278.85	1338.34	1278.23	1288.82
														25.7496	1318.91	1215.97	1200.2	1255.61	1210.89	1260.42	1223.33	1266.32	1280.1	1342.58	1279.18	1290.86
														25.8109	1320.28	1217.24	1200.38	1257.21	1210.89	1260.55	1223.95	1267.8	1281.68	1345.1	1279.93	1289.25
														25.872	1319.21	1215.79	1200.04	1256.94	1212.8	1262.21	1224.58	1267.73	1279.98	1341.5	1280.16	1292.37
														25.9332	1322.67	1217.04	1199.08	1257	1213.38	1261.89	1222.55	1267.49	1280.81	1343.05	1281.02	1291.13
														25.9945	1319.18	1216.1	1200.5	1256.72	1211.7	1261.17	1225.99	1268.12	1280.37	1348.22	1281.8	1293.77
														26.0555	1318.15	1217.18	1196.6	1257.24	1214.26	1262.27	1225.16	1270.43	1280.31	1344.33	1280.15	1292.82
														26.1167	1317.3	1214.6	1196.39	1252.5	1207.47	1258.65	1221.23	1267.13	1279.86	1339.05	1277.55	1290.34
														26.1778	1318.69	1218.49	1197.66	1254.53	1211.45	1261.19	1224.06	1265.34	1278.87	1342.19	1283.54	1289.77
														26.239	1320.36	1215.36	1198.67	1256.09	1213.35	1263.12	1225.5	1270.17	1281.13	1343.7	1281.3	1292.33
														26.3002	1321.05	1218.66	1199.78	1257.9	1212.08	1264.77	1224.23	1269.31	1281.35	1343.52	1282.34	1294.15
														26.3615	1322.39	1218.13	1200.93	1260.22	1215.7	1263.75	1225.64	1274.18	1283.94	1345.01	1284.91	1291.73
														26.4224	1320.62	1218.32	1197.77	1255.75	1213.96	1260.33	1223.26	1271.16	1281.75	1340.27	1283.47	1291.61
														26.4836	1319.7	1218.24	1198.8	1256.58	1213.68	1260.42	1223.76	1269.13	1280.09	1342.08	1283.21	1292.8
														26.545	1319.37	1214.95	1190.51	1250.01	1207.73	1257.09	1220.77	1268.45	1275.68	1341.21	1277.97	1287.3
														26.6061	1315.5	1210.91	1189.99	1253.52	1208.91	1257.7	1219.37	1265.19	1277.3	1337.44	1278.59	1288.67
														26.6673	1319.24	1219.32	1194.1	1255.7	1211.57	1263.78	1223.35	1270.16	1280.61	1341.74	1285.86	1293.25
														26.7283	1319.25	1217.9	1198.29	1257.19	1214.92	1264.33	1224.26	1272.51	1279.56	1344.29	1284.84	1292.44
														26.7895	1319.5	1216.39	1193.99	1255.78	1210.49	1262.12	1222.05	1271.98	1277.9	1341.41	1282.95	1290.42
														26.8508	1315.13	1213.6	1189.62	1253.38	1209.39	1258.48	1218.24	1268.08	1276.2	1337.76	1281.01	1290.23
														26.9118	1316.79	1213.35	1191.57	1251.8	1208.66	1261.87	1220.94	1268.17	1278.05	1340.08	1281.95	1287.91
														26.973	1323.21	1220.42	1196.47	1257.68	1214.53	1262.69	1226.15	1271.73	1281.78	1342.99	1289.06	1293.38
														27.0342	1321.24	1219.56	1193.67	1256.37	1212.41	1262.47	1223.4	1273.6	1280.89	1343.84	1285.01	1292.61
														27.0954	1319.39	1218.97	1195.49	1256.19	1215.05	1263.01	1223.18	1274.51	1281.25	1345.02	1286.03	1294.72
														27.1565	1318.2	1214.65	1190.02	1255.4	1213.91	1258.61	1222.01	1272.09	1280.06	1339.92	1283.4	1291.35
														27.2177	1318.49	1216.36	1193.74	1253.58	1210.83	1261.24	1221.44	1270.36	1279.41	1341.33	1283.89	1292.37
														27.2789	1317.37	1215.78	1191.85	1257.28	1214.11	1258.4	1222.38	1272.68	1279.19	1341.11	1284.78	1290.25
														27.3401	1316.87	1217.05	1188.62	1253.06	1209.52	1260.99	1223.03	1271.98	1276.08	1340.48	1284.66	1290.16
														27.4012	1319.14	1217.74	1191.36	1254.78	1212.01	1261.59	1223.23	1271.98	1279.04	1343.09	1289.5	1292.79
														27.4623	1316.62	1215.26	1190.17	1254.65	1213.92	1262.24	1221.25	1272.98	1279.76	1342.01	1283.69	1290.01
														27.5235	1318.79	1216.14	1188.51	1253.08	1211.42	1261.55	1222.78	1273.23	1277.2	1341.88	1284.52	1291.08
														27.5847	1319.8	1216.51	1191.26	1255.94	1214.77	1261.13	1222.85	1272.84	1280.17	1343.5	1287.28	1294.41
														27.6458	1315.88	1214.98	1188.6	1252.33	1211.55	1255.84	1219.38	1269.69	1279.45	1337.84	1286.45	1289.16
														27.707	1316.54	1211.31	1186.59	1251.85	1208.32	1258.67	1219.14	1268.91	1274.88	1338.12	1284.64	1290.44
														27.7681	1316.67	1215.19	1187.42	1253.91	1209.43	1260.31	1219.41	1270.61	1276.64	1338.6	1287.02	1289.07
														27.8293	1310.19	1211.34	1184.37	1248.5	1208.8	1256.41	1218.13	1270.3	1275.17	1334.8	1285.18	1288.34
														27.8905	1313.69	1210.46	1182.56	1249.18	1206.98	1257.49	1217.24	1268.92	1275.42	1333.38	1283.49	1288.13
														27.9516	1319.45	1215.9	1184.99	1253.18	1211	1263.77	1220.58	1272	1279.87	1340.67	1286.5	1291.37
														28.0127	1313.89	1211.91	1185.71	1251.93	1207.46	1259.45	1218.83	1272.52	1277.39	1337.41	1284.41	1286.52
														28.0739	1314.82	1212.44	1183.74	1250.46	1208.25	1260.01	1218.35	1266	1274.59	1337.55	1284.45	1289.75
														28.1351	1314.36	1212.81	1184.16	1252.28	1209.25	1257.9	1220.69	1272.23	1278.08	1338.07	1288.36	1290.43
														28.1962	1316.08	1212.71	1182.6	1251.32	1210.72	1263.05	1223.08	1274	1277.9	1339.66	1290.05	1291.96
														28.2574	1317.2	1214.68	1184.72	1254.71	1212.85	1261.91	1220.72	1274.79	1279.05	1341.68	1289.74	1291.84
														28.3186	1317.54	1214.73	1184.76	1253.22	1211.39	1259.24	1222.99	1274.46	1278.49	1338.24	1287.26	1291.27
														28.3797	1311.34	1207.99	1180.66	1248.26	1207.09	1256.76	1217.31	1270.46	1274.29	1334.71	1286.34	1290.18
														28.441	1314.03	1211.08	1182.41	1249.81	1209.06	1257.38	1218.18	1272.51	1273.64	1336.26	1286.41	1289.31
														28.5022	1318.72	1214.52	1186.6	1254.68	1209.63	1262.9	1221.59	1278.8	1281.7	1337.88	1292.54	1293.27
														28.5632	1313.87	1212.34	1182.55	1252.73	1208.23	1261.29	1219.9	1275.86	1280.72	1340.94	1292.04	1292.55
														28.6245	1312.7	1207.56	1180.71	1251.49	1208.17	1257.51	1217.04	1272.31	1275.22	1334.64	1287.85	1290.12
														28.6857	1313.36	1209.65	1182.07	1250.01	1208.86	1256.94	1218.64	1271.64	1273.28	1337.93	1289.11	1288.35
														28.7467	1314.92	1210.48	1185.8	1250.85	1210.12	1260.57	1219.42	1272.27	1277.02	1339.65	1292.15	1292.18
														28.808	1314.56	1212.08	1185.56	1251.83	1210.22	1261.11	1222.15	1274.93	1276.36	1338.61	1291.2	1295.61
														28.869	1315.79	1212	1182.08	1252.43	1211.51	1262.15	1220.27	1277.18	1279.26	1338.01	1292.6	1292.7
														28.9303	1317.14	1213.46	1184.19	1253.07	1211.25	1262.61	1221.8	1276.08	1277.82	1338.5	1291.17	1292.19
														28.9913	1311.06	1210.64	1181.17	1251.8	1209.37	1259.59	1219.81	1274.23	1279.34	1337.3	1292.56	1292.09
														29.0526	1311.08	1210.66	1180.48	1252.06	1206.94	1262.26	1219.37	1274.98	1274.93	1336.11	1292.2	1292.69
														29.1137	1308.38	1207.91	1176.48	1249.35	1204.54	1255.52	1215.16	1272.72	1271.97	1333.96	1287.75	1288.6
														29.1747	1313.08	1209.3	1180.24	1250.07	1208.83	1258.79	1219.54	1272.67	1273.92	1336.93	1288.07	1291.67
														29.2361	1312.4	1210.34	1182.16	1253.11	1208.65	1260.3	1220.95	1275.84	1277.72	1341.32	1293.38	1294.61
														29.2973	1315.68	1212.57	1182.04	1252.04	1211.78	1262.55	1221.87	1280.24	1279.4	1338.31	1292.4	1292.42
														29.3583	1311.16	1209.56	1177.81	1247.91	1206.34	1257.39	1218.32	1272.22	1276.15	1337.69	1291.59	1293.44
														29.4198	1307.06	1207.16	1176.21	1244.79	1208.02	1254.65	1216.67	1275.11	1273.76	1333.2	1288.67	1289.84
														29.4808	1310.39	1205.61	1179.46	1247.02	1203.05	1257.26	1215.89	1272.32	1273.74	1335.89	1289.07	1288.81
														29.5418	1315.55	1213.22	1180.22	1251.02	1211.57	1258.39	1219	1276.46	1276.4	1337.51	1295.77	1295.96
														29.6031	1315.08	1210.3	1180.92	1249.07	1211.16	1262.21	1220.39	1277.3	1275.35	1338.24	1295.8	1298.45
														29.6641	1310.38	1205.9	1178.5	1247.99	1206.19	1257.17	1218.28	1272.73	1276.23	1334.02	1289.54	1291.52
														29.7253	1308.52	1206.79	1173.22	1247.72	1205.25	1255.91	1216.06	1270.72	1270.04	1332.01	1287.37	1289.46
														29.7866	1307.88	1210.09	1178.94	1247.77	1206.13	1260.65	1216.12	1274.47	1275.8	1336.15	1292.94	1293.18
														29.8477	1309.9	1204.92	1173.88	1247.9	1204.87	1258.26	1215.42	1273.37	1271.89	1332.57	1290	1293.54
														29.9087	1308.84	1208.08	1175.17	1249.02	1207.14	1256.19	1214.17	1273.26	1272.38	1332.87	1290.07	1291.68
														29.9701	1306.7	1204.75	1173.47	1246.13	1200.99	1254.59	1213.41	1272.76	1269.31	1331.79	1288.15	1291.79
														30.0312	1305.67	1208.39	1176.21	1251.1	1204.8	1260.65	1219.75	1276.6	1274.93	1337.13	1293.11	1292.69
														30.0924	1309.09	1205.64	1177.4	1245.34	1205.72	1256.7	1215.9	1276.29	1276.29	1334.52	1292.49	1293.07
														30.1535	1311.86	1208.06	1179.26	1249.53	1205.93	1257.49	1217.17	1277.02	1272.5	1334.34	1294.72	1292.88
														30.2146	1307.8	1208.75	1176.23	1248.04	1205.76	1259.29	1216.64	1274.05	1274.73	1335.29	1294.7	1292.23
														30.2758	1306.72	1204.92	1173.44	1243.2	1204.31	1255.8	1214.13	1270.02	1271.05	1329.67	1289.76	1289.31
														30.3371	1305.01	1209.98	1174.4	1244.83	1203.77	1254.21	1214.45	1273.6	1271.11	1332.06	1291.4	1292.1
														30.3982	1305.44	1206.86	1173.31	1243.09	1201.53	1258.04	1214.1	1272.55	1269.79	1331.3	1291.91	1290.39
														30.4593	1308.89	1209.08	1177.06	1245.62	1205.54	1259.3	1215.28	1275.79	1271.8	1335.25	1296.36	1292.97
														30.5206	1312.2	1211.08	1178.22	1247.3	1208.73	1261.8	1219.52	1279.66	1276.44	1337.9	1295.82	1295.99
														30.5816	1312.62	1212.81	1179.59	1248.86	1208.22	1259.4	1220.44	1278.03	1276.67	1337.68	1298.58	1294.75
														30.6428	1312.47	1207.38	1175.73	1246.32	1206.99	1258.13	1216.43	1275.07	1273.11	1334.1	1292.32	1293.57
														30.7041	1311.07	1204.77	1178.02	1246.34	1203.96	1254.3	1216.38	1273.54	1272.68	1333.52	1295.47	1291.76
														30.7651	1308.89	1206.31	1176.38	1249.82	1205.53	1258.31	1217.87	1278.4	1272.99	1334.94	1297.46	1296.53
														30.8262	1309.4	1205.31	1174.85	1247.7	1205.47	1255.03	1215.64	1274.18	1272.11	1332.58	1295.63	1294.14
														30.8876	1309.54	1203.88	1177.09	1247.78	1207.44	1257.78	1217.16	1279.35	1273.53	1333.48	1297.27	1294.97
														30.9487	1307.99	1205.04	1174.89	1245.12	1206.34	1256.61	1214.22	1276.18	1271.77	1333.65	1296.36	1292.92
														31.0097	1306.49	1204.85	1177.07	1246.56	1204.86	1251.76	1215.02	1275.87	1270.82	1332.62	1296.1	1293.24
														31.071	1305.86	1205.54	1173.51	1246.4	1205.43	1253	1213.37	1272.72	1271.07	1332.11	1300.32	1293.12
														31.1322	1307.57	1208.72	1176.32	1245.74	1206.99	1256.29	1215.78	1277.24	1275.54	1333.47	1296.77	1295.34
														31.1932	1304.69	1204.62	1173.8	1242.96	1201.74	1251.6	1214.65	1276.32	1267.3	1332.6	1293.15	1289.75
														31.2545	1306.76	1206.07	1175.28	1245.33	1204.32	1253.87	1216.09	1277.25	1273.08	1335.3	1298.54	1295.83
														31.3156	1314.5	1213.07	1181.78	1251.38	1208.3	1262.82	1219.87	1284.71	1276.96	1338.03	1303.56	1298.89
														31.3767	1307.7	1208.45	1174.72	1248.19	1205.63	1256.71	1216.88	1277.65	1275.1	1336.75	1297.09	1294.69
														31.4379	1299.12	1199.43	1169.03	1238.26	1198.76	1246.24	1210.16	1271.72	1266.39	1329.61	1290.46	1290.01
														31.4992	1301.52	1201.27	1169.68	1242.35	1201.94	1250.58	1212.46	1274.2	1267.23	1330.54	1295.44	1289
														31.5602	1303.22	1203.93	1171.2	1244.02	1202.72	1251.52	1213.23	1275.12	1269.95	1330.25	1294.36	1291.56
														31.6214	1307.35	1205.46	1174.57	1246.08	1205.56	1253.37	1215.37	1277.61	1270.89	1334.08	1298.48	1295.56
														31.6827	1308.91	1203.82	1178.54	1248.26	1206.88	1255.82	1216.54	1276.33	1272.37	1333.32	1301.09	1295.47
														31.7436	1304.16	1204.98	1175.13	1245.39	1203.47	1253.15	1215.33	1276.23	1271.82	1335.01	1300.96	1295.86
														31.8048	1306.51	1204.28	1172.39	1244.28	1201.01	1250.93	1211.78	1271.12	1271.48	1330.48	1298.48	1294.71
														31.8661	1308.85	1208.43	1175.13	1247.35	1208.22	1252.1	1214.78	1275.89	1269.45	1336.11	1299.65	1296.76
														31.9271	1308.07	1206.34	1175.53	1247.1	1204.8	1253.69	1216.04	1278.02	1271.73	1332.94	1296.92	1295.23
														31.9883	1306.1	1206.39	1175.49	1246.86	1206.16	1251.21	1216.09	1275.57	1273.31	1332.73	1299.16	1296.95
														32.0496	1308.61	1203.2	1172.78	1241.66	1205.13	1252.64	1212.81	1273.41	1270.68	1333.06	1297.77	1295.69
														32.1107	1304.17	1205.14	1173.93	1244.47	1203.67	1254.17	1213.02	1272.01	1267.05	1333.3	1298.55	1294.45
														32.1718	1302.59	1201.52	1171.53	1243.77	1203.58	1247.37	1212.16	1271.03	1268.65	1328.64	1297.8	1295.22
														32.2331	1303.93	1203.09	1170.8	1241.35	1204.97	1248.1	1211.1	1269.05	1265.82	1327.9	1297.81	1292.09
														32.2942	1305.39	1204.24	1174.33	1244.29	1204.1	1250.33	1214.42	1272.98	1270.42	1331.6	1297.76	1294.81
														32.3555	1307.06	1206.96	1174.37	1245.03	1204.25	1250.36	1214.7	1274.6	1271.47	1333.45	1300.92	1298.53
														32.4167	1301.19	1198.27	1170.89	1238.95	1199.17	1247.66	1209.28	1269.86	1265.82	1328.86	1292.45	1291.09
														32.4777	1301.97	1200.22	1170.84	1240.01	1200.27	1245.9	1209.61	1268.21	1267.64	1328.36	1294.16	1289.33
														32.5388	1300.66	1198.83	1169.88	1243.51	1200.78	1247.43	1211.87	1272.42	1267.71	1332.03	1295.97	1293.21
														32.6	1306.82	1203.3	1173.25	1244.74	1206.56	1248.81	1213.61	1274.9	1272.66	1334.45	1296.32	1295.58
														32.6612	1303.77	1202.73	1173.53	1242.99	1203.06	1248.72	1213.04	1272.53	1271.42	1330.91	1299.4	1297.33
														32.7224	1306.83	1203.21	1173.6	1246.69	1202.48	1250	1212.3	1273.59	1269.2	1327.35	1295.68	1294.33
														32.7836	1302.31	1202.71	1171.34	1241.24	1202.15	1245.31	1210.65	1271.14	1268.45	1329.14	1295.78	1295.32
														32.8446	1299.53	1199.91	1171.18	1242.22	1201.33	1246.73	1209.4	1270.72	1267.14	1327.93	1295.29	1294.46
														32.9059	1300.58	1199.48	1168.49	1239.57	1201.01	1243.89	1209.19	1266.77	1267.34	1327.85	1296.48	1293.38
														32.9672	1304.83	1201.29	1173.18	1244.62	1205.67	1246.59	1210.69	1271.27	1268.87	1328	1297.9	1296.88
														33.0282	1308.51	1206.09	1174.39	1246.34	1206.14	1250.65	1214.27	1273.55	1272.55	1330.75	1300.78	1298.69
														33.0892	1310.52	1205.77	1176	1246.69	1206.37	1247.77	1216.29	1273.31	1271.97	1334.63	1302.06	1298.79
														33.1504	1305.4	1205.07	1174.55	1245.28	1204.91	1248.25	1213.2	1269.66	1270.49	1331.76	1302.12	1298.73
														33.2116	1303	1201.49	1173.04	1243.93	1203.78	1246.79	1210.82	1270.23	1268.75	1332.62	1300.04	1296.28
														33.2729	1298.89	1199.76	1168.55	1240.38	1199.31	1242.1	1207.01	1265.97	1268.36	1325.34	1296.46	1292.31
														33.3339	1298.79	1199.39	1168.73	1238	1197.31	1243.95	1207.36	1265.97	1264.23	1325.68	1293.54	1292.7
														33.3951	1302.5	1198.13	1170.75	1241.07	1201.63	1243.32	1208.79	1268.66	1266.46	1329.7	1296.3	1294.48
														33.4564	1302.45	1202.98	1172.2	1243.33	1203.79	1246.89	1211.68	1268.32	1269.98	1334.28	1298.36	1295.39
														33.5174	1300.57	1198.54	1170.66	1237.94	1197.91	1244.08	1207.72	1263.43	1266.54	1324.9	1294.88	1291.56
														33.5787	1297.42	1198.56	1168.34	1238.14	1198.99	1243.78	1207.12	1267.53	1264.34	1325.24	1295.21	1292.1
														33.6398	1300.14	1197.34	1168.89	1236.91	1198	1238.52	1204.52	1262.68	1262.08	1323.22	1296.09	1290.17
														33.701	1301.5	1201.02	1171.42	1239.88	1203.52	1245.61	1210.96	1270.83	1270.53	1327.92	1297.36	1294.09
														33.7623	1300.1	1201.86	1170.65	1237.22	1202.47	1246.1	1208.4	1269.8	1267.2	1329.17	1300.06	1295.28
														33.8234	1299.93	1200.02	1171.82	1238.79	1204.08	1244.88	1207.89	1266.72	1265.65	1327.29	1296.16	1293.6
														33.8844	1296.89	1199.4	1170.31	1240.01	1203.21	1245.04	1208.22	1265.4	1265.46	1326.4	1298.25	1295.2
														33.9457	1299.95	1201.05	1172.02	1239.68	1202.12	1246.28	1209.28	1267.79	1268.77	1326.7	1298.17	1295.38
														34.0068	1299.22	1199.4	1169.3	1239.16	1200.88	1241.78	1207.52	1267.2	1264.23	1328.06	1296.6	1293.6
														34.068	1296.61	1199.23	1171.33	1237.71	1198.68	1239.99	1208.08	1266.27	1267.29	1328.66	1298.55	1296.22
														34.1291	1300.89	1202.01	1171.18	1239.86	1202.98	1246.76	1210.72	1266.74	1268.42	1328.25	1298.96	1292.98
														34.1903	1300.56	1201.46	1174.18	1240.99	1201.87	1246.4	1209.84	1267.17	1271.96	1330.5	1299.3	1293.22
														34.2513	1293.6	1197.18	1165.91	1234.26	1200.64	1238.28	1203.27	1260.86	1259.55	1320.03	1290.72	1288.03
														34.3126	1292.97	1196.26	1167.17	1235.43	1195.6	1238.53	1202.39	1262.22	1261.17	1321.41	1289.48	1289.22
														34.3738	1297.54	1200.23	1169.59	1237.58	1200.33	1241.65	1207	1266.57	1263.28	1327.54	1295	1294.1
														34.4348	1305.87	1205.63	1177.72	1244.45	1206.2	1245.66	1211.83	1271.89	1271.16	1332.56	1299.95	1297.86
														34.4961	1297.92	1202.53	1174	1240.94	1203.01	1244.86	1210.47	1269.36	1267.55	1327.86	1296.73	1297.77
														34.5573	1294.83	1199.78	1170.65	1237.09	1196.84	1240	1207.84	1265.79	1266.68	1323.65	1294.03	1292.36
														34.6184	1291.76	1194.69	1168.76	1235.73	1197.31	1238.46	1203.56	1261.15	1260.69	1323.08	1290.42	1289.44
														34.6796	1294.95	1196.53	1170.83	1235.53	1201.02	1240.02	1205.66	1264.11	1266.22	1325.3	1295.53	1294.02
														34.7408	1295.12	1201.41	1173.4	1236.6	1200.98	1243.83	1209.33	1265.36	1267.45	1327.08	1297.07	1294.89
														34.802	1296.19	1204.33	1174.82	1239.11	1202.38	1243.49	1209.35	1266.03	1268.1	1328.8	1299.98	1294.27
														34.8631	1299.95	1202.42	1175.7	1238.84	1201.09	1245.58	1211.38	1266.22	1269.12	1325.79	1297.37	1296.09
														34.9242	1297.65	1198.3	1171.76	1239.33	1201.27	1243.83	1209.3	1269.15	1268.44	1326.79	1296.13	1296.11
														34.9854	1295.87	1198.56	1173.2	1239.26	1203.06	1241.7	1209.09	1266.13	1264.71	1324.89	1297.65	1295.42
														35.0466	1293.93	1199.44	1174.14	1239.36	1198.57	1243.78	1209.08	1267.19	1267.29	1323.95	1298.28	1295.23
														35.1078	1295.59	1200.52	1172.58	1238.07	1200.69	1241.72	1209.54	1267.76	1266.96	1325.58	1299.51	1293.9
														35.1688	1293.06	1197.92	1174.26	1237.16	1198.6	1240.75	1206.07	1265.43	1264.22	1322.5	1296.41	1292.55
														35.2299	1296.32	1199.3	1170.39	1237.81	1201.09	1241.72	1205.44	1262.81	1265.63	1323.16	1294.92	1296.06
														35.2912	1293.09	1195.11	1170.29	1235.97	1196.61	1237.38	1204.32	1263.15	1264.29	1324.49	1294.11	1294.43
														35.3523	1293.3	1196.97	1170.1	1234.88	1197.78	1239.36	1204.51	1260.74	1262.91	1321.57	1292.18	1292.86
														35.4135	1298.2	1198.38	1174.15	1235.29	1199.43	1243.6	1207.47	1263.49	1266.73	1325.96	1299	1296.13
														35.4747	1293.34	1197.36	1169.63	1236.38	1195.26	1240.74	1205.15	1260.86	1263.05	1321.52	1296.35	1297.36
														35.5358	1291.78	1196.43	1171.94	1234.07	1199.42	1239.88	1205.71	1264.57	1264.9	1321.79	1298.53	1294.38
														35.5969	1293.43	1195.55	1172.32	1235.22	1198.69	1241.37	1205.64	1264.13	1264.46	1322.8	1296.13	1295.43
														35.6584	1294.26	1194.59	1174.11	1235.61	1198.3	1239.92	1204.29	1262.62	1265.15	1320.33	1293.52	1293.19
														35.7194	1294.52	1191.52	1173.47	1235.4	1198.12	1242.03	1207.21	1264.13	1263.4	1322.91	1295.8	1295.2
														35.7804	1289.84	1195.51	1170.61	1233.07	1196.03	1239.89	1204.25	1261.03	1263.13	1321.52	1293.91	1295.08
														35.8418	1291.35	1191.85	1166.85	1231.17	1195.07	1237.64	1200.97	1256.74	1260.07	1319.6	1293.08	1292.49
														35.9029	1295.82	1193.71	1170.18	1234.14	1198.88	1241.67	1205.2	1259.84	1264.68	1321.47	1291.27	1297.85
														35.964	1293.52	1195.17	1173.81	1238.36	1197.98	1243.2	1207.78	1261.8	1265.96	1323.79	1295.34	1297.71
														36.0252	1293.72	1196.37	1172.51	1237.68	1198.31	1241.7	1205.24	1261.1	1265	1324.16	1295.08	1295.34
														36.0863	1292.5	1192.64	1172.21	1233.9	1198.46	1238.61	1204.08	1259.81	1264.75	1320.22	1294.28	1295.23
														36.1474	1291.9	1195.33	1171.8	1234.66	1197.35	1239.96	1204.9	1263.24	1269.83	1322.28	1295.72	1295.04
														36.2087	1296.14	1196.83	1168.71	1236.46	1197.34	1242.35	1206.09	1262.08	1263.24	1323.1	1293.08	1298.67
														36.2698	1290.43	1189.88	1171.34	1234.67	1196.63	1238.28	1203	1258.47	1263.38	1316.6	1292.67	1292.05
														36.3309	1292.6	1191.23	1168.69	1235.44	1195.92	1239.77	1203.38	1260.49	1263.59	1320.6	1292.05	1297.66
														36.3921	1294.55	1197.24	1172.42	1236.9	1200.8	1243.84	1207.23	1261.9	1266.8	1323.74	1296.58	1297.04
														36.4533	1293.6	1194.96	1173.95	1231.86	1198.93	1240.94	1207.04	1260.91	1266.98	1318.77	1294.92	1298.97
														36.5144	1291.7	1194.2	1171.68	1237.14	1202.23	1243.47	1207.7	1261.42	1265.1	1324.51	1295.51	1297.25
														36.5757	1290.52	1193.46	1174.23	1232.97	1196.22	1243.64	1204.84	1261.28	1263.07	1319.91	1293.32	1294.68
														36.6368	1292.71	1195.66	1174.51	1234.34	1201.56	1242.36	1206.26	1260.89	1264.85	1319.25	1294.18	1295.25
														36.698	1291.16	1193.94	1173.82	1235.3	1201.54	1242.52	1205.33	1260.2	1267.36	1323.35	1297.03	1297.97
														36.7593	1294.47	1193.71	1175.17	1234.86	1199.7	1242.52	1206.92	1262.27	1266.3	1322.31	1295.75	1301.16
														36.8201	1293.75	1192.89	1171.95	1235.25	1196.36	1240.75	1203.56	1259.76	1263.25	1320.6	1290.03	1294.87
														36.8813	1296.12	1192.85	1174.72	1233.08	1198.34	1240.49	1202.04	1257.25	1264.61	1321.36	1292.6	1295.99
														36.9427	1290.31	1190.79	1171.75	1231.1	1195.28	1235.86	1200.31	1258.18	1262.11	1317.39	1291.65	1295.11
														37.0039	1291.58	1192.06	1175.24	1233.84	1196.15	1240.33	1203.76	1259.97	1264.24	1318.33	1290.09	1295.82
														37.065	1293.52	1193.17	1175.72	1233.88	1201.95	1244	1205.3	1262.99	1264.22	1321.26	1294.74	1298.83
														37.1262	1291.99	1195.55	1173.24	1231.55	1199.33	1240.5	1202.96	1262.04	1266.04	1321.34	1293.68	1298.72
														37.1873	1290.96	1190.79	1170.51	1231.07	1199.19	1239.88	1203.05	1261.51	1262.83	1317.55	1288.42	1295.81
														37.2483	1289.25	1188.3	1173.69	1230.64	1195.17	1242.2	1202.95	1257.31	1262.94	1318.61	1292.2	1294.29
														37.3096	1288.97	1191.07	1173.26	1229.89	1197.84	1239.24	1199.64	1256.85	1261.97	1320.07	1291.12	1295.96
														37.3708	1288.5	1191.03	1175.38	1231.4	1196.68	1241.73	1202.87	1256.96	1264.08	1318.07	1291.35	1296.78
														37.4319	1291.85	1195.9	1178.39	1231.47	1196.61	1241.42	1204.32	1259.01	1267	1319.42	1294.79	1298.01
														37.493	1295.86	1191.48	1174.93	1234.82	1202.19	1245.52	1205.23	1258.55	1266.38	1321.91	1295	1297.17
														37.5542	1290.42	1191.95	1174.26	1232.51	1196.43	1240.98	1202.1	1255.96	1261.45	1318.17	1291.83	1295.16
														37.6153	1289.03	1193.22	1173.93	1232.58	1196.94	1241.57	1202.81	1255.67	1264.88	1316.5	1292.04	1296.29
														37.6765	1292.68	1198.2	1178.1	1235.99	1202.02	1245.84	1205.18	1264.29	1267.35	1323.65	1295.8	1298.65
														37.7378	1297.41	1200.28	1178.46	1240.39	1205.7	1248.32	1209.09	1266.16	1274.63	1324.08	1301.4	1301.85
														37.7988	1297.58	1196.38	1180.41	1236.84	1205.16	1247.88	1207.13	1261.95	1266.79	1324.32	1296.12	1304.65
														37.8601	1293.28	1195.34	1178.17	1232.65	1199.12	1246.46	1203.14	1259.18	1267.09	1318.78	1294.42	1297.25
														37.9213	1287.47	1191.59	1171.8	1230.6	1196.72	1238.71	1198.94	1256.2	1263.81	1315.68	1291.11	1293.72
														37.9824	1287.87	1190.15	1173.74	1229.24	1195.85	1241.13	1200.09	1255.94	1262.9	1313.38	1289.76	1296.71
														38.0434	1289.28	1191.85	1173.72	1233.44	1196.05	1242.92	1201.96	1254.41	1264.26	1316.49	1293.37	1297.41
														38.1046	1295.71	1195.76	1180.48	1237.07	1201.62	1248.34	1207.5	1260.93	1269.11	1320.56	1296.66	1301.32
														38.1657	1290.01	1193.71	1174.76	1230.25	1200.22	1239.93	1201.98	1257.64	1264.26	1316.03	1290.63	1294.93
														38.227	1289.88	1191.86	1174.25	1229.24	1195.98	1242.8	1197.68	1255.98	1263.36	1316.64	1291.28	1298.32
														38.2881	1289.9	1191.55	1170.98	1229.06	1196.59	1242.53	1200.6	1255.51	1263.2	1313.65	1289	1296.14
														38.3494	1290.97	1193.37	1175.43	1233.78	1199.91	1245.06	1200.11	1258.87	1263.18	1316.5	1290.58	1296.59
														38.4105	1291.93	1193.56	1177.18	1229.99	1198.23	1244.39	1202.03	1258.51	1268.45	1318.7	1291.01	1299.79
														38.4718	1292.39	1194.52	1180.98	1233.75	1197.97	1247.49	1202.44	1258	1266.14	1318.81	1292.63	1300.57
														38.5329	1289.66	1193.21	1175.9	1231.62	1199.32	1247.23	1201.57	1257.89	1267.2	1317.13	1291.23	1299.64
														38.5939	1287.8	1193.31	1174.17	1231.13	1195.23	1245.93	1202.15	1256.49	1265.36	1317.62	1289.59	1299.51
														38.6551	1289.87	1191.03	1173.32	1228.25	1197.03	1243.98	1199.44	1253.37	1266.29	1316.6	1289.28	1297.13
														38.7163	1289.32	1190.49	1177.47	1229.16	1198.19	1244.24	1200.08	1257.63	1264.6	1316.16	1290.97	1299.7
														38.7775	1291.19	1189.23	1176.74	1230.54	1197.73	1242.56	1200.64	1256.3	1266.36	1313.73	1292.34	1299.02
														38.8388	1290.33	1189.85	1175.09	1228.56	1197.45	1241.81	1199.98	1256.76	1266.73	1316.65	1288.38	1295.52
														38.8998	1287.52	1192.32	1176.99	1229.4	1196.37	1244.64	1199.59	1255.03	1263.91	1314.25	1291.59	1298.89
														38.9609	1290.35	1192.42	1180.91	1230.14	1199.62	1250.1	1201.38	1258.77	1265.25	1316.05	1290.31	1302.89
														39.0221	1290.95	1192.73	1176.84	1230.69	1199.48	1245.88	1202.43	1256.64	1267.86	1316.44	1290.18	1299.64
														39.0832	1288.56	1188.55	1175.78	1228.26	1198.23	1246.58	1197.97	1255.56	1264.12	1313.37	1287.06	1294.42
														39.1445	1289.92	1192.92	1177.88	1231.2	1199.24	1246.32	1201.93	1256.8	1267.43	1317.99	1292.27	1301.63
														39.2057	1293.99	1194.89	1179.06	1230.24	1198.02	1251.15	1201.74	1258.32	1270.05	1318.58	1291.17	1301.62
														39.2668	1289.5	1188.08	1175.18	1229.95	1198.02	1244.32	1199.27	1253.97	1265.07	1313.46	1289.56	1297.71
														39.328	1290.35	1189.9	1177.92	1230.09	1198.68	1245.31	1200.3	1257.46	1265.25	1314.69	1288.65	1298.96
														39.3893	1285.55	1190.16	1174.92	1225.77	1193.83	1243.22	1198.27	1254.82	1262.29	1313.91	1287.52	1301.05
														39.4503	1281.33	1186.17	1170.67	1223.14	1192.13	1239.87	1193.37	1251.64	1260.19	1309.9	1284.66	1295.24
														39.5115	1288.01	1187.12	1173.46	1227.59	1195.86	1243.92	1198.19	1255.26	1265.12	1311.29	1284.74	1299.08
														39.5725	1292.73	1191.59	1177.78	1233.06	1201.91	1246.74	1204.12	1259.86	1267.59	1318.83	1292.09	1306.15
														39.6337	1288.48	1188.37	1179.05	1228.14	1197.14	1246.14	1199.57	1256.51	1264.23	1314.73	1288.15	1300.1
														39.6951	1292.71	1193.76	1179.31	1232.03	1201.19	1252.33	1201.52	1258.71	1270.05	1315.78	1287.93	1302.01
														39.7561	1291.8	1191.98	1178.22	1231.03	1200.97	1246.88	1204	1261.16	1270.22	1315.57	1291.02	1302.98
														39.8173	1289.8	1194.43	1176.78	1230.85	1200.94	1249.67	1202.05	1260.56	1269.14	1313.94	1288.74	1304.31
														39.8785	1287.94	1189.25	1176.68	1226.81	1197.62	1245.96	1197.39	1256.44	1265.04	1312.61	1285.71	1302.72
														39.9396	1289.27	1191.35	1176.86	1227.9	1199.1	1246.9	1201.16	1257.68	1268.6	1314.99	1287.92	1303.62
														40.0008	1295.02	1194.21	1180.56	1231.82	1203.34	1251.55	1201.01	1260.49	1269.54	1317.31	1293.04	1310.21
														40.0619	1289.74	1190.91	1178.7	1228.12	1197.89	1249.31	1201.23	1261.41	1271.53	1314.76	1293.83	1305.44
														40.1231	1292.07	1190.52	1177.43	1230.59	1199.71	1249.42	1199.11	1258.56	1269.02	1315.84	1290.7	1306.92
														40.1843	1296.01	1190.62	1177.58	1231.35	1199.88	1252.08	1201.78	1258.99	1269.62	1317.73	1294.91	1307.04
														40.2454	1288.76	1189.8	1179.54	1228.66	1198.51	1245.7	1199.17	1256.79	1266.58	1313.43	1290.7	1305.89
														40.3065	1288.49	1188.57	1174.89	1228.44	1195.14	1248.64	1198.58	1257.34	1266.37	1311.79	1286.38	1301.63
														40.3677	1290.61	1193.31	1181.55	1230.55	1202.63	1250.24	1200.87	1261.09	1270.28	1318.11	1291.55	1307.98
														40.4289	1293.21	1192.11	1179.43	1230.44	1199.73	1252.75	1201.97	1259.58	1270.75	1313.96	1290.39	1305.97
														40.49	1290.9	1191.56	1179.17	1228.23	1198.57	1249.93	1199.4	1257.78	1266.5	1311.17	1289.17	1304.46
														40.5513	1288.54	1189.3	1178.9	1224.81	1196.54	1246.8	1199.34	1258.34	1269.06	1314.41	1288.23	1303.21
														40.6124	1286.74	1186.5	1177.24	1225.82	1197.89	1247.52	1197.55	1254.2	1266.6	1310.69	1288.86	1304.36
														40.6736	1290.04	1187.1	1178.36	1230.03	1201.14	1248.24	1198.86	1258.83	1269.73	1312.44	1288.84	1305.61
														40.7348	1289.62	1189.78	1179.46	1228.67	1200.09	1248.63	1199.2	1259.36	1269.59	1315.39	1287.31	1304.48
														40.7958	1288.34	1189.73	1175.99	1225.35	1196.1	1249.8	1196.2	1256.08	1266.14	1310.61	1286.71	1302.19
														40.857	1286.81	1185.51	1173.87	1223.94	1195.57	1247.13	1196.17	1254.48	1266.58	1309.65	1283	1304.84
														40.9182	1284.55	1186.54	1174.3	1223.37	1198.41	1246.9	1194.3	1254.84	1268.26	1310.35	1282.9	1301.96
														40.9792	1283.78	1185.55	1170.51	1224.57	1195.71	1247.37	1195.23	1256.93	1266.41	1308.08	1282.18	1301.78
														41.0404	1286.24	1189.94	1178.59	1227.43	1198.03	1250.1	1197.87	1258.89	1268.92	1311.23	1288.66	1307.59
														41.1017	1286.08	1190.72	1174.77	1225.37	1198.77	1248.34	1196.5	1256.49	1266.7	1311.95	1288.39	1307.58
														41.163	1288.65	1192.06	1176.52	1226.84	1201.13	1250.52	1199.1	1259.98	1270.99	1313.69	1288.39	1310.17
														41.2241	1287.41	1190.75	1179.47	1230.29	1202.57	1250.68	1197.38	1259.7	1268.44	1314.27	1288.07	1308.54
														41.2853	1289.37	1193.33	1178.15	1228.1	1200.91	1251.99	1198.53	1261.55	1272.28	1314.08	1288.92	1306.91
														41.3464	1288.7	1188.3	1176.91	1226.51	1199.69	1251.86	1198.5	1260.89	1265.31	1313.66	1287.28	1308.97
														41.4075	1288.89	1192.09	1177.15	1227.51	1201.08	1250.75	1198.92	1261.37	1269.96	1309.84	1289.91	1308.96
														41.4688	1285.63	1185.87	1175.72	1224.64	1196.45	1249.02	1194.12	1256.36	1263.24	1309.94	1283.35	1303.36
														41.5299	1284.02	1188.13	1173.89	1223.64	1197.82	1247.01	1194.99	1258.42	1266.48	1310.59	1286.2	1306.27
														41.5911	1289.43	1191.33	1175.59	1225.64	1202.27	1250.95	1196.54	1260.37	1268.73	1310.5	1288.3	1309.08
														41.6521	1289.63	1186.56	1172.7	1227.16	1198.52	1248.74	1196.78	1257.55	1267.35	1311.68	1283.46	1307.82
														41.7133	1288.55	1188.67	1175.99	1226.05	1199	1249.8	1195.3	1255.92	1268.06	1310.45	1285.99	1304.87
														41.7745	1289.44	1189.21	1176.67	1225.33	1200.45	1252.27	1196.52	1260.11	1270.11	1313.34	1287.57	1308.56
														41.8356	1286.53	1187.27	1175.81	1226.13	1199.81	1249.45	1196.42	1257.64	1270.04	1308.08	1284.39	1310.3
														41.8968	1288.76	1191.22	1179.89	1226.42	1200.12	1250.24	1198.34	1262.9	1271.9	1310.96	1286.67	1308.37
														41.958	1293.05	1191.67	1175.85	1226.96	1201.16	1256.21	1198.76	1263.08	1272.03	1315.22	1291.25	1311.09
														42.0191	1290.6	1190.58	1176.69	1226.18	1202.32	1254.49	1198.84	1262.67	1270.56	1313.69	1289.2	1311.25
														42.0804	1287.46	1191.68	1180.05	1227.51	1204.16	1253.8	1198.81	1263.72	1272.33	1315.41	1289.05	1313.69
														42.1415	1290.28	1191.41	1180.37	1228.05	1204.49	1256.09	1201.11	1265.1	1274.12	1315.07	1292.08	1315.97
														42.2026	1287.39	1190.14	1177.88	1225.84	1202.84	1252.32	1196.84	1262.54	1270.57	1311.2	1290.33	1309.92
														42.2639	1287.37	1190.17	1179.38	1225.78	1201.2	1255.3	1196.85	1263.24	1273.77	1312.1	1289.34	1313.2
														42.325	1286.98	1190.01	1178.59	1223.48	1201.91	1254.92	1197.73	1261.56	1267.21	1308.83	1288.37	1308.66
														42.386	1286.05	1189.52	1175.12	1224.41	1203.4	1254.71	1196.26	1259.11	1270.09	1312.11	1288.19	1312.52
														42.4473	1285.94	1188.73	1176.45	1226.61	1199.84	1253.32	1197.12	1261.98	1272.85	1311.99	1289.34	1312.83
														42.5085	1289.03	1191.54	1179.57	1228.22	1205.99	1256.55	1198.6	1266.21	1273.9	1314.67	1290.93	1315.99
														42.5696	1290.72	1191.14	1177.76	1226.27	1205.38	1256.62	1199.02	1266.75	1273.83	1313.78	1292.82	1314.89
														42.6309	1287.44	1187.55	1175.58	1223.69	1200.63	1253.83	1195.98	1262.28	1266.82	1309.79	1289.34	1311.03
														42.6919	1284.03	1184.93	1169.42	1219.37	1199.24	1250.54	1190.22	1257.25	1265.3	1304.83	1282.75	1306.26
														42.753	1285.7	1187.75	1173.11	1223.75	1200.91	1255.91	1194.42	1262.75	1271.74	1311.17	1289.8	1312.92
														42.8143	1286.43	1189.77	1175.81	1223.33	1203.33	1258.84	1196.29	1261.53	1270.93	1314.17	1286.19	1315.13
														42.8754	1285.63	1187.49	1176.45	1223.1	1203.02	1255.25	1194.99	1262.95	1268.94	1311.45	1289.28	1312.76
														42.9365	1288.21	1187.73	1175.44	1222.86	1199.95	1254.73	1194.96	1261.98	1270.1	1309.44	1288.37	1311.44
														42.9979	1286.38	1188.7	1174.57	1223.48	1201.33	1256.16	1196.42	1262.77	1273.51	1310.47	1287.43	1311.71
														43.059	1286.6	1188.26	1174.5	1222.21	1198.18	1255.71	1194.11	1261.03	1270.28	1311.72	1287.39	1313.26
														43.12	1283.62	1183.48	1170.06	1221.21	1200.03	1252.06	1192.11	1259.91	1266.64	1307.34	1284.62	1310.03
														43.1813	1286.63	1188.14	1174	1220.02	1198.75	1254.29	1194.51	1264.91	1270.79	1306.79	1285.35	1315.95
														43.2424	1287.47	1189.21	1178.27	1225.3	1205.06	1260.42	1197.72	1263.28	1272.46	1313.9	1289.07	1315.75
														43.3035	1285.94	1188.75	1175.9	1223.62	1202.02	1255.71	1193.3	1261.84	1270.49	1310.38	1287.33	1313.69
														43.3649	1284.66	1184.75	1171.43	1222.97	1200.44	1257.6	1192.02	1264.53	1270.81	1307.79	1283.59	1312.29
														43.426	1279.54	1184.36	1171.22	1220.33	1199.7	1252.38	1189.74	1262.43	1268.45	1305.09	1281.71	1310.81
														43.487	1283.79	1184.19	1171.35	1222.36	1200.16	1253.94	1191.66	1260.27	1269.9	1306.34	1284.96	1310.68
														43.5483	1285.72	1186.71	1172.6	1225.79	1204.14	1256.57	1194.88	1265.36	1272.94	1309.07	1288.89	1315.61
														43.6094	1287.72	1189.98	1176.3	1225.23	1202.36	1260.57	1195.85	1268.18	1273.11	1310.8	1287.24	1317.11
														43.6706	1284.83	1185.56	1175.06	1224.36	1202.37	1255.2	1194.08	1262.37	1272.65	1308.65	1285.97	1318.46
														43.7317	1281.15	1182.1	1171	1219.4	1201.85	1254.57	1190.86	1263.35	1273.43	1306.99	1285.85	1315.44
														43.7929	1284.4	1182.92	1175.58	1221.42	1201.36	1256.4	1191.6	1263.08	1270	1306.52	1285.35	1315.08
														43.8539	1287.03	1186.55	1173.53	1222.13	1202.87	1257.3	1194.92	1269.81	1274.67	1309	1285.17	1314.89
														43.915	1288.84	1187.88	1174.37	1224.75	1208.62	1259.47	1195.59	1270.07	1275.05	1310.75	1287.79	1317.11
														43.9763	1283.47	1185.75	1171.73	1220.97	1201.2	1256.48	1192.31	1266.28	1272.97	1306.17	1286.18	1314.91
														44.0374	1284.5	1185.99	1171.82	1223.33	1202.99	1258.62	1191.35	1266.25	1275	1307.06	1287.15	1317.41
														44.0986	1287.11	1190.82	1177.94	1224.92	1208.95	1260.5	1197.46	1272.28	1279.31	1311.37	1290.12	1319.02
														44.1598	1286.22	1187.59	1175.05	1223.8	1203.71	1256.89	1193.1	1269.15	1273.26	1309.04	1285.71	1317.3
														44.221	1285.3	1187.71	1176.19	1220.35	1205.88	1260.89	1193.43	1267.87	1274.95	1308.66	1285.77	1317.69
														44.2822	1287.67	1189.24	1175.21	1224.57	1207.09	1262.21	1195.13	1270.39	1277.49	1313.51	1291.05	1321.16
														44.3435	1285.07	1187.67	1177.63	1222.71	1203.68	1258.45	1194.53	1271.07	1276.06	1308.61	1288.63	1318.87
														44.4044	1281.6	1184.72	1171.17	1220.31	1205.78	1255.95	1190.21	1265.26	1276.45	1304.72	1286.99	1316.24
														44.4657	1285.76	1187.86	1172.76	1225.52	1207.23	1260.55	1194.63	1270.56	1276.45	1310.71	1290.85	1319.6
														44.5269	1279.21	1183.92	1169.22	1216.43	1199.87	1252.7	1188.02	1268.14	1271.51	1301.83	1284.37	1316.61
														44.588	1283.83	1183.36	1173.68	1221.09	1205.04	1257.57	1191.21	1268.93	1275.07	1309.32	1289.67	1319.94
														44.6492	1288.86	1189.47	1175.81	1223.11	1205.23	1262.43	1195.06	1271.18	1278.15	1308.69	1290.28	1321.74
														44.7103	1284	1185.99	1174.22	1223.17	1206.76	1261.25	1193.26	1272.92	1279.7	1307.93	1288.7	1320.17
														44.7715	1282.59	1188.36	1174.64	1222.9	1205.83	1258.35	1192.38	1270.74	1272.85	1307.75	1286.4	1319.96
														44.8326	1282.13	1184.64	1171.24	1218.84	1204.29	1257.4	1192.06	1270.62	1276.41	1305.95	1288.66	1320.67
														44.8938	1286.09	1187.37	1173.64	1222.2	1207.65	1262.03	1190.42	1273.71	1275.39	1309.37	1288.09	1320.41
														44.9549	1286.07	1187.12	1174	1224.5	1208.59	1262.99	1193.51	1275.74	1277.64	1308.85	1287.75	1323.42
														45.0161	1286.55	1186.69	1172.13	1222.79	1207.62	1259.79	1195.18	1274.07	1282.25	1309.37	1289.84	1323.14
														45.0773	1281.45	1181.41	1168.43	1217.16	1204.42	1254.63	1188.89	1270.93	1273.82	1301.1	1283.31	1314.81
														45.1384	1279.44	1181.2	1170.56	1216.77	1204.51	1257.07	1190.03	1270.17	1275.72	1304.69	1283.65	1317.29
														45.1996	1282.54	1184.13	1172.48	1219.06	1205.26	1260.9	1192.01	1271.24	1277.17	1306.77	1288.7	1321.47
														45.2609	1279.08	1186.85	1175.59	1221.5	1208.89	1262.46	1194.58	1275.4	1280.71	1309.15	1288.77	1322.18
														45.3219	1284.13	1185.33	1175.35	1222.31	1208.33	1261.63	1194.37	1275.54	1278.82	1307.89	1289	1321.2
														45.3831	1283.46	1187.6	1173.16	1223.69	1207.71	1260.27	1192.59	1274.35	1281.66	1307.96	1288.15	1323.74
														45.4444	1283.94	1184.64	1172.85	1222.11	1205.46	1260.03	1191.76	1272.64	1277.52	1306.02	1288.18	1321.31
														45.5055	1277.39	1178.27	1165.93	1214.61	1201.14	1255.13	1186.06	1267.56	1274.18	1302.37	1284.08	1315.27
														45.5667	1283.79	1184.49	1170.98	1222	1206.51	1260.79	1192.38	1275.64	1280.67	1306.26	1291.05	1323.04
														45.6279	1281.73	1182.47	1173.8	1220.2	1208.3	1261.59	1191.75	1275.58	1279.19	1308.76	1289.14	1321.62
														45.689	1281.21	1184.13	1173.1	1219.6	1204.22	1256.98	1188.92	1275.86	1279.1	1305.61	1288.76	1317.13
														45.7501	1276.54	1179.11	1168.39	1218.2	1200.68	1255.63	1187.22	1272.2	1276.19	1304.42	1288.41	1320.21
														45.8112	1282.33	1180.49	1170.27	1219.35	1204.44	1260.36	1190.3	1275.24	1281.35	1305.3	1285.73	1318.25
														45.8724	1280.05	1182.59	1172.43	1220.78	1207.16	1257.74	1188.91	1275.16	1278.45	1304.6	1286	1320.71
														45.9335	1286.48	1184.93	1171.09	1220.85	1207.66	1261.91	1190.84	1277.07	1284.13	1304.21	1292.68	1325.12
														45.9947	1285.3	1184.51	1173.23	1219.66	1209.94	1261.72	1194.07	1278.15	1283.5	1309.61	1289.72	1325.52
														46.056	1282.59	1185.62	1170.6	1218.4	1206.26	1260.11	1189.87	1275.25	1279.41	1305.6	1287.05	1320.49
														46.1171	1277.72	1182.58	1168.09	1214.48	1203.81	1256.94	1190.17	1274.19	1280.99	1304.24	1284.77	1318.01
														46.1782	1282.37	1181.89	1169.84	1218.96	1206.12	1258.1	1189.68	1275.02	1282.4	1305.55	1287.14	1320.6
														46.2394	1282.36	1184.93	1173.1	1218.66	1208.88	1263.12	1192.51	1276.51	1284.39	1308.82	1287.53	1322.4
														46.3006	1286.35	1185.19	1171.39	1222.23	1208.58	1261.31	1189.74	1278.62	1283.37	1306.07	1289.95	1324.01
														46.3616	1278.16	1179.28	1168.32	1213.1	1204	1256.45	1188.19	1273.36	1279.61	1303.94	1283.21	1320.61
														46.4229	1280.3	1178.34	1164.38	1217.3	1202.6	1256.22	1186.1	1273.58	1277.24	1299.32	1281.64	1318.82
														46.484	1280.02	1183	1168.86	1216.8	1206.41	1258.55	1186.49	1274.42	1278.65	1303.08	1287.62	1317.93
														46.5452	1281.62	1181.56	1171.34	1221.42	1208.7	1261.01	1191.42	1276.19	1283.84	1306.93	1287.8	1322.23
														46.6063	1281.9	1182.29	1169.41	1221.95	1207.45	1257.63	1189.99	1277.68	1279.77	1303.51	1286.62	1320.13
														46.6675	1280.53	1180.88	1170.33	1217.29	1206.52	1258.61	1187.98	1275.05	1280.47	1302.37	1285.34	1317.59
														46.7287	1284.95	1181.72	1170.55	1217.03	1208.13	1259.74	1190.05	1278.83	1283.54	1305.19	1287.49	1323.01
														46.7899	1280.05	1180.21	1168.75	1217.11	1205.04	1259.42	1187.94	1278.05	1281.1	1303.52	1286.1	1319.53
														46.8511	1276.62	1178.38	1164.42	1215.06	1205.37	1257.88	1185.04	1272.19	1278.11	1299.22	1285.7	1316.86
														46.9121	1273.16	1174.23	1160.46	1208.14	1201.42	1251.6	1182.32	1270.47	1273.64	1295.83	1279.23	1313.6
														46.9736	1276.99	1180.11	1169.58	1214.23	1205.01	1258.24	1184.76	1272.45	1282.45	1303.56	1284.01	1321.23
														47.0345	1280.98	1182.25	1168.17	1218.49	1207.75	1263.23	1190.69	1276.59	1283.93	1305.69	1287.13	1324.43
														47.0957	1283.39	1184.1	1171.15	1218.98	1208.65	1263.41	1191.89	1277.44	1286.72	1305.62	1288.26	1324.39
														47.1569	1280.67	1186.34	1172.77	1220.57	1211.85	1260.02	1191.68	1279.79	1286.08	1303.9	1287.05	1326.04
														47.2181	1278.14	1181.39	1168.3	1216.6	1207.89	1259.45	1187.01	1274.66	1281.67	1302.56	1285.43	1318.67
														47.2792	1278.59	1178.32	1167.25	1216.55	1208.9	1257.03	1188.67	1278.66	1278.54	1301	1283.18	1318.28
														47.3404	1278.9	1177.64	1169.39	1219.16	1210.5	1259.24	1188.13	1276.11	1284.27	1302.49	1284.97	1322.92
														47.4015	1279.74	1182.7	1169.15	1218.67	1206.14	1259.02	1189.03	1278.5	1283.57	1305.23	1285.05	1321.82
														47.4626	1281.09	1178.16	1168.68	1215.61	1209.17	1259.88	1187.76	1275.56	1283.86	1302.36	1285.78	1324.14
														47.5238	1278.34	1180.53	1168.57	1216.12	1205.88	1258.21	1187.13	1277.73	1283.29	1302.4	1284.86	1320.91
														47.585	1279.1	1180.79	1168.28	1216.41	1204.88	1260.05	1185.39	1278.29	1284.99	1299.37	1284.83	1318.35
														47.6461	1282.05	1178.84	1170.22	1216.64	1207.18	1259.48	1186.68	1279.4	1282.2	1301.42	1285.67	1316.84
														47.7074	1281.24	1182.38	1171.78	1218.23	1207.8	1262.42	1188.38	1276.55	1285.12	1303.91	1288.23	1324.3
														47.7684	1282.66	1183.32	1170.32	1218.85	1212.38	1262.57	1190.69	1282.63	1288.45	1305.53	1290.31	1325.6
														47.8297	1279.83	1180.13	1169.46	1218.38	1203.88	1260.52	1186.59	1277.82	1284.22	1302.92	1286.28	1319.86
														47.8907	1278.8	1176.25	1167.36	1214.6	1204.9	1259.6	1184.81	1276.54	1283.03	1300.92	1284.12	1318.99
														47.952	1277.32	1179.03	1168.06	1214.81	1205.52	1259.07	1185.24	1278.24	1284.57	1299.4	1287.18	1318.66
														48.013	1276.49	1177.39	1163.87	1212.89	1205.66	1258.71	1186.25	1276.52	1281.8	1301.57	1284.67	1320.71
														48.0743	1279.97	1178.72	1169.43	1217.89	1208.31	1259.45	1187.38	1282.57	1286.17	1304.13	1285.53	1322
														48.1355	1280.08	1179	1168.96	1213.21	1207.24	1258	1185.9	1278.7	1284.12	1303.35	1288.55	1321
														48.1966	1277.72	1180.6	1168.08	1214.67	1208.62	1259.22	1187.75	1277.93	1285.38	1300.38	1284.26	1323.06
														48.2576	1275.46	1177.2	1164.43	1210.06	1204.45	1254.45	1182.15	1277.06	1281.1	1296.49	1282.28	1317.79
														48.319	1273.51	1175.52	1167.13	1213.23	1206.69	1255.08	1183.25	1275.99	1281	1296.88	1284.35	1316.45
														48.3801	1280.35	1180.21	1169.89	1217.6	1209.11	1258.73	1186.4	1279.69	1285.99	1304.83	1286.43	1318.9
														48.4412	1281.86	1179.91	1169.35	1216.22	1209.38	1261.04	1187.39	1280.42	1285.49	1304.48	1288.7	1322.49
														48.5025	1280.34	1179.17	1167.18	1216.91	1206.99	1259.96	1187.86	1277.55	1284.48	1298.96	1286.31	1320.05
														48.5636	1279.59	1181.45	1166.09	1214.8	1208.16	1259.32	1186	1279.3	1283.46	1299.37	1286.48	1320.86
														48.6247	1276.96	1177.17	1164.04	1213.03	1204.9	1255.67	1184.22	1277.29	1280.54	1297.94	1281.56	1316.46
														48.686	1270.85	1174.1	1162.1	1208.82	1202.63	1253.2	1181.89	1275.22	1277.03	1294.88	1281.2	1314.82
														48.7471	1279.45	1175.88	1167.78	1215	1204.9	1256.94	1185.67	1280.17	1283.39	1297.42	1282.59	1316.43
														48.8083	1278.65	1180.13	1167.85	1217.87	1207.32	1259.72	1186.89	1278.3	1283.31	1303.65	1286.84	1322.28
														48.8696	1277.2	1175.35	1166.39	1211.88	1206.52	1257.29	1184.54	1274.99	1282.09	1299.32	1282.8	1318.74
														48.9305	1277.54	1178.95	1168.36	1212.76	1206.63	1259.24	1184.34	1279.61	1284.26	1302.37	1284.67	1321.15
														48.9916	1277.74	1180.58	1169.18	1216.68	1209.45	1261.16	1186.49	1279.46	1284.32	1301.47	1286.93	1320.23
														49.053	1277.28	1176.83	1163.59	1212.04	1205.86	1256.76	1184.3	1277.55	1282.42	1298.15	1282.94	1318.12
														49.1142	1274.59	1176.9	1166.38	1212.87	1206.85	1254.94	1181.45	1274.05	1282.06	1297.97	1280.35	1316
														49.1752	1281.44	1177.44	1167.8	1216.35	1211.12	1260.87	1186.44	1280.54	1285.35	1302.24	1288.13	1321.76
														49.2365	1276.67	1177.02	1164.14	1210.62	1204.82	1252.21	1183.6	1278.55	1282.64	1300.68	1281.32	1319.11
														49.2976	1278.88	1176.4	1166.02	1214.75	1204.92	1255.05	1185.24	1278.05	1284.26	1299.09	1285.25	1318.12
														49.3587	1277.02	1177	1166.07	1215.44	1209.7	1256.61	1184.44	1277.25	1281.87	1299.64	1285.47	1319.73
														49.4198	1275.15	1175.46	1164.29	1212.09	1203.51	1253.25	1180.98	1277.09	1283.43	1298.44	1280.7	1318.64
														49.4811	1274.89	1177.67	1163.44	1212.91	1206.42	1257.92	1184.31	1274.78	1281.67	1297.45	1282.69	1316.84
														49.5422	1280.07	1176.6	1165.56	1212.45	1205.55	1258.44	1183.1	1279.86	1282.23	1300.95	1282.97	1318.87
														49.6034	1280.64	1179.07	1167.3	1212.47	1208.85	1261.76	1185.19	1277.03	1285.69	1302.47	1285.9	1320.9
														49.6645	1276.13	1175.98	1165.9	1212.86	1208.59	1257.11	1186.59	1279.58	1285.92	1297.82	1283.64	1317.47
														49.7256	1274.43	1174.47	1165.8	1213.31	1207.59	1256.59	1182.94	1279.28	1281.83	1296.29	1280.53	1318.51
														49.7869	1277.07	1173.18	1163.62	1212.86	1203.44	1256.58	1181.77	1275.2	1283.6	1297.6	1282.88	1319.78
														49.8481	1275	1179.16	1167.27	1213.29	1210.35	1258.74	1187.02	1279.27	1284.55	1297.74	1286.01	1319.28
														49.9091	1284.71	1181.07	1168.38	1216.53	1211.02	1262.24	1188.59	1285.57	1289.16	1302.22	1288.18	1325.22
														49.9704	1278.23	1179.01	1168.03	1217.09	1210.37	1259.03	1186.4	1280.77	1288.23	1302.48	1287.86	1324.91
														50.0315	1271.13	1172.57	1160.67	1209.63	1204.16	1253.26	1182.22	1277.47	1281.05	1297.6	1283.09	1320.16
														50.0926	1272.44	1177.64	1161.94	1210.78	1202.91	1255.85	1182.41	1276.99	1282.17	1299.22	1282.37	1314.55
														50.1538	1275.85	1176.53	1165.51	1214.51	1207.86	1257.62	1184.2	1277.6	1285.33	1298.24	1282.97	1321.11
														50.215	1274.93	1175.47	1164.63	1211.73	1205.59	1255.68	1183.48	1279.86	1285.94	1297.97	1280.66	1320.17
														50.2761	1276.14	1176.1	1162.83	1212.4	1205.93	1254.32	1182.72	1278.15	1285.04	1296.82	1284.64	1314.76
														50.3373	1274.52	1177.66	1169.33	1212.03	1208.5	1257.67	1184.11	1281.01	1287.4	1299.09	1284.3	1321.73
														50.3985	1273.24	1177.27	1164.59	1211.07	1208.21	1261.73	1184.3	1280.32	1283.04	1300.14	1284.4	1318.5
														50.4596	1273.13	1179.69	1165.9	1213.5	1208.63	1259.54	1184.36	1280.46	1284.62	1300.46	1285.37	1321.01
														50.5208	1271.51	1175.65	1165.25	1212.99	1205.5	1259.35	1182.93	1277.97	1283.23	1295.67	1283.93	1321.77
														50.582	1267.7	1173.74	1162.17	1208.9	1204.6	1254.43	1180.31	1275.05	1280.41	1294.77	1281.2	1316.45
														50.6432	1267.22	1174.75	1165.11	1210.76	1206.8	1256.51	1180.6	1275.02	1283.71	1295.99	1281.49	1318.31
														50.7043	1267	1175.71	1163.8	1211.59	1206.8	1256.76	1183.03	1278.18	1283.69	1299.92	1282.63	1320.58
														50.7656	1267.55	1172.1	1162.05	1212.45	1205.35	1255.74	1183.01	1276.71	1285.75	1296.18	1282.25	1318.29
														50.8266	1267.42	1175.45	1165.02	1211.05	1205.78	1254.92	1184.94	1279.16	1283.81	1296.74	1283.4	1320.96
														50.8878	1260.69	1174.12	1163.17	1207.35	1204.04	1255.16	1182.73	1274.47	1283.03	1295.73	1280.56	1317.39
														50.9491	1259.99	1174.13	1161.02	1208.7	1205.42	1255.88	1179.65	1278.35	1284.26	1295.33	1278.93	1314.39
														51.0101	1262.27	1174.69	1161.29	1213.39	1205.96	1257.22	1181.91	1278.19	1284.64	1296.1	1282.26	1318.99
														51.0712	1262.86	1176.14	1165.32	1211.96	1207.36	1257.31	1183.98	1279	1283.55	1299.51	1283.33	1319.89
														51.1325	1262.22	1177.41	1168.32	1215.7	1213.29	1258.11	1186.11	1277.76	1287.55	1299.42	1286.32	1321.34
														51.1936	1256.68	1176.67	1161.4	1210.71	1206.63	1255.26	1182.82	1276.62	1285.29	1297.01	1280.93	1318.95
														51.2547	1256.24	1176.45	1161.83	1211.27	1207.78	1258.45	1180.68	1277.95	1283.36	1294.65	1280.7	1319.74
														51.316	1253.68	1172.16	1159.61	1209.21	1203.37	1253.19	1180.4	1277.32	1282.8	1290.49	1281.04	1318.07
														51.3771	1253.31	1172.2	1162.26	1207.39	1203.79	1255.27	1181.06	1276.67	1280.72	1293.34	1279.1	1316.32
														51.4384	1253.17	1175.8	1162.59	1210.72	1204.63	1255.35	1180.39	1275.96	1283.57	1295.31	1279.68	1317.9
														51.4995	1253.34	1175.42	1165.17	1211.25	1207.91	1259.54	1183.19	1279.93	1284.95	1298.17	1281.82	1317.55
														51.5605	1253.86	1177.2	1165.64	1213.72	1208.85	1258.35	1185.75	1282.75	1286.6	1297.17	1283.82	1321.17
														51.6217	1252.7	1173.23	1166.04	1207.69	1205.24	1254.75	1183.46	1276.59	1282.39	1295.47	1282.52	1319.86
														51.6828	1251.17	1175.15	1162.36	1208.45	1204.51	1255.28	1182.64	1275.89	1283.3	1293.55	1281.32	1317.07
														51.7441	1253.65	1176.11	1164.44	1210.45	1210.5	1259.3	1184.24	1278.12	1285.22	1299.13	1285.59	1321.74
														51.8052	1251.59	1177.48	1167.13	1210.38	1205.99	1260.19	1184.18	1277.95	1286.93	1295.73	1281.21	1318.87
														51.8665	1251.95	1176.35	1166.36	1209.83	1208.59	1259.25	1185.47	1281.04	1285.27	1299.07	1284.84	1321.04
														51.9275	1246.88	1176.06	1163.41	1209.49	1204.31	1256.57	1183.03	1277.89	1283.91	1294.29	1281.17	1317.7
														51.9886	1247.85	1172.66	1159.59	1205.97	1204.56	1255.25	1181.19	1277.65	1284.48	1293.74	1281.63	1318.96
														52.0499	1244.48	1170.47	1158.5	1206.84	1203.05	1254.26	1177.63	1276.72	1278.29	1291.31	1276.65	1314.68
														52.111	1245.89	1172.57	1164.14	1210.45	1205.54	1255.26	1180.83	1275.82	1282.29	1292.93	1280.5	1317.71
														52.1722	1247.9	1173.67	1163.02	1211.81	1206.54	1254.92	1183.28	1281.09	1283.79	1295.63	1282.99	1320.2
														52.2333	1243.79	1172.32	1158.01	1204.98	1203.96	1255.81	1178.92	1275.89	1281.51	1293.2	1278.03	1315.11
														52.2946	1247.11	1171.37	1162.66	1206.72	1203.5	1252.72	1181.15	1276.86	1280.54	1294.25	1279.11	1316.08
														52.3557	1247.33	1173.26	1162.7	1209.93	1204.66	1252.39	1181.95	1279.37	1286.7	1295.13	1280.47	1320.03
														52.4168	1246.9	1174.87	1165.49	1210.37	1208.47	1255.8	1183.89	1276.88	1285.12	1294.83	1282.5	1317.68
														52.4781	1250.23	1180.28	1170.1	1212.71	1210.78	1260.14	1186.19	1284.47	1288.42	1299.15	1284.13	1323.24
														52.5392	1246.74	1175.26	1163.96	1208.29	1206.29	1255.22	1183.05	1279.93	1283.7	1293.79	1281.22	1319.37
														52.6003	1243.94	1167.76	1157.92	1204.5	1203.57	1248.28	1178.17	1273.7	1277.27	1288.46	1275.04	1311.99
														52.6616	1242.79	1172	1158.96	1208	1201.91	1252.96	1179.47	1273.59	1279.92	1292.86	1278.54	1313.87
														52.7227	1238.69	1170.04	1155.76	1206.81	1200.01	1252.42	1176.11	1269.85	1278.03	1291.44	1277.97	1312.76
														52.7838	1244.83	1170.43	1157.73	1206	1204.83	1253.37	1180.27	1273.41	1279.01	1292.24	1275.93	1316.06
														52.8451	1247.85	1174.54	1162.76	1208.94	1208.01	1257.89	1184.01	1280.02	1284.92	1296.18	1284.25	1318.63
														52.9062	1247.27	1175.92	1166.61	1211.67	1210.58	1259.99	1185.42	1283.23	1288.7	1297.23	1284.65	1323.03
														52.9673	1248.12	1174.3	1162.41	1210.41	1205.22	1256.5	1182.27	1278.57	1284.78	1296.2	1283.61	1319.63
														53.0285	1250.37	1175.53	1164.34	1212.5	1209.87	1259.04	1185.47	1279.44	1285.29	1297.32	1285.41	1323.75
														53.0897	1245.14	1168.53	1161.18	1207.35	1203.41	1255.21	1179.31	1276.55	1279.76	1290.83	1280.5	1317.01
														53.1508	1244.55	1170.85	1159.41	1208.42	1203.69	1252.74	1178.59	1274.76	1284.36	1290.29	1277.17	1315.08
														53.212	1248.13	1173.49	1164.77	1212.1	1206.48	1260.08	1181.82	1279.22	1286.13	1297.35	1285.64	1319.17
														53.2732	1245.52	1172.89	1162.75	1209.8	1205.92	1254.64	1182.56	1279.96	1283.81	1294.35	1282.68	1320.16
														53.3343	1242.79	1169.41	1161.59	1207.05	1200.93	1250.7	1177.68	1276.04	1279.2	1290.67	1277.82	1315.4
														53.3955	1245	1171.93	1159.59	1206.69	1203.58	1254.61	1179.75	1274.88	1281.86	1291.83	1276.74	1314.18
														53.4567	1249.79	1174.8	1163.46	1209.32	1209.57	1254.46	1184.62	1278.68	1282.49	1294.57	1282.51	1320.95
														53.5178	1246.29	1170.93	1161.43	1209.16	1203.5	1254.01	1179.48	1277.69	1285.66	1292.44	1279.37	1314.79
														53.5789	1249.05	1172.31	1160.05	1207.19	1206.7	1253.94	1180.2	1275.22	1279.02	1291.65	1277.46	1316.25
														53.6401	1249.34	1172.71	1160.03	1205.87	1201.89	1252.85	1179.32	1276.08	1280.6	1290.18	1280.67	1315.14
														53.7012	1249.05	1171.44	1161.02	1209.22	1207.94	1254.22	1182.34	1276.67	1283.88	1294.27	1280.83	1319.3
														53.7625	1245.3	1170.34	1161.9	1208	1203.85	1252.47	1179.63	1274.2	1283.96	1292.8	1278.8	1314.97
														53.8237	1244.08	1168.09	1156.33	1205.04	1201.03	1250.52	1176.24	1272.96	1277.71	1289.4	1275.39	1312.79
														53.8848	1243.51	1168.24	1158.1	1203.66	1200.19	1252.15	1175.89	1272.48	1277.99	1288.34	1275.95	1314.67
														53.946	1247.75	1169.32	1160.13	1205.98	1203.72	1253.31	1179.34	1275.92	1278.62	1291.43	1276.25	1312.8
														54.0071	1248.84	1167.24	1159.29	1208.71	1201.01	1252.43	1178.96	1276.69	1281.75	1290.84	1280.27	1313.9
														54.0682	1247.73	1168.23	1159.94	1208.35	1205.72	1253.74	1179.52	1275.51	1281.73	1291.21	1280.34	1314.88
														54.1294	1247.02	1167.75	1159.16	1203.64	1200.38	1252.79	1178.29	1272.54	1279.81	1291.87	1277.55	1312.39
														54.1906	1247.02	1167.4	1159.49	1204.27	1201.71	1253.84	1177.15	1274.04	1277.89	1289.67	1275.03	1313.82
														54.2518	1247.96	1171.16	1160.83	1208.17	1203.22	1252.94	1180.01	1274.86	1279.25	1287.85	1280.09	1315.08
														54.3129	1249.68	1169.95	1162.76	1210.41	1205.25	1255.84	1179.27	1278.11	1282.76	1291.69	1281.09	1315.83
														54.3742	1250.83	1173.67	1162.21	1208.91	1204.1	1255.44	1179.34	1275.53	1280.71	1294.79	1278.23	1314.84
														54.4353	1248.81	1167.4	1159.93	1202.27	1203.61	1252.16	1177.8	1273.31	1280.04	1288.41	1276.05	1313.05
														54.4962	1246.38	1170.79	1159.34	1204.85	1201.83	1251.76	1178.67	1273.2	1277.45	1289.89	1274.62	1311.79
														54.5577	1252.56	1169.25	1157.32	1207.46	1205.02	1253.99	1178.58	1274.57	1280.2	1291.13	1277.46	1317.57
														54.6188	1251.94	1170.17	1160.99	1206.72	1203.17	1254.27	1179.62	1277.1	1282.88	1292.68	1278.92	1315.77
														54.6799	1248.91	1168.72	1159	1201.9	1202.85	1251.19	1178.84	1276.89	1279.69	1291.71	1276.44	1315.75
														54.7411	1247.68	1167.96	1156.67	1205.43	1201.35	1249.99	1178.58	1275.39	1280.39	1287.59	1275.12	1311.86
														54.8022	1248.73	1168.91	1159.46	1203.95	1199.83	1250.67	1175.69	1272.33	1276.92	1288.63	1275.58	1311.23
														54.8634	1247.94	1167.58	1155.89	1205.72	1199.31	1253.13	1176.52	1271.47	1278.94	1289.63	1276.43	1312.52
														54.9246	1249.92	1168.94	1159.97	1204.86	1202.28	1253.14	1176.52	1273.4	1278.82	1287.7	1273.87	1312.69
														54.9858	1252.25	1166.99	1155.8	1203.63	1200.07	1252.87	1177.97	1275.84	1279.42	1289.03	1276.27	1315.2
														55.0469	1246.49	1165.3	1156.43	1201.27	1199.52	1249.07	1175.85	1272.19	1278.49	1287.76	1274.76	1313.4
														55.108	1249.14	1165.85	1157.86	1201.38	1197.45	1249.64	1175.65	1273.38	1276.91	1286.06	1273.5	1309.75
														55.1692	1247.6	1164.35	1154.68	1200.88	1198.59	1249.86	1173.81	1269.88	1275.69	1285.31	1273.35	1310.14
														55.2303	1249.97	1167.01	1158.15	1205.06	1200.06	1250.14	1176.75	1272.38	1276.8	1289.86	1275.5	1310.33
														55.2915	1251.88	1165.37	1155.39	1205.65	1200.44	1250.01	1177.34	1274.44	1276.9	1287.42	1277.34	1314.77
														55.3527	1253.52	1166.93	1158.94	1205.89	1200.01	1253.25	1177.63	1276.92	1280.7	1292.3	1278.47	1314.6
														55.4138	1251.63	1171.47	1157.1	1204.49	1203.89	1251.82	1179.83	1272.38	1279.74	1288.29	1277.05	1315.54
														55.4751	1251.42	1167.23	1156.53	1203.52	1200.86	1250.21	1176.04	1272.05	1280.28	1286.99	1275.5	1313.77
														55.5362	1252.24	1167.4	1157.11	1203.48	1200.92	1252.53	1177.51	1274.13	1280.47	1288.78	1277.54	1313.32
														55.5972	1253.86	1167.19	1159.04	1205.09	1199.94	1253.07	1178.85	1275.94	1277.28	1286.8	1274.73	1311.39
														55.6585	1252.55	1168.03	1157.28	1203.1	1200.44	1250.95	1177	1272.94	1279.72	1289.14	1276.67	1314.03
														55.7196	1252.81	1166.84	1157.98	1203.48	1201.97	1249.97	1177.92	1277.26	1282	1287.17	1277.12	1313.75
														55.7807	1252.71	1165.63	1156.11	1203.48	1199.71	1250.03	1178.4	1270.98	1278.72	1284.78	1275.93	1309.53
														55.842	1257.26	1172.71	1159.9	1207.17	1203.53	1254.08	1178.99	1274.57	1282.07	1289.38	1278.59	1316.86
														55.903	1258.34	1169.96	1160.98	1209.31	1202.94	1255.22	1179.55	1275.12	1280.23	1292.18	1277.43	1318.23
														55.9642	1255.16	1169.67	1159.28	1205.12	1201	1253.22	1179.36	1274.82	1280.85	1291.1	1277.01	1317.19
														56.0255	1256.02	1171.07	1158.87	1202.55	1200.91	1250.94	1177.62	1272.87	1279.75	1286.88	1279.24	1313.52
														56.0867	1253.26	1170.12	1156.18	1201.93	1202.71	1253.18	1176.08	1272.55	1276.7	1287.2	1275.83	1313.93
														56.1478	1257.47	1169.08	1158.28	1204.5	1203.61	1252.45	1179.04	1275.27	1279.72	1290.3	1275.22	1312.9
														56.209	1255.09	1171.08	1159.01	1206.94	1201.4	1253.04	1179.43	1277.83	1282.46	1287.71	1278.83	1313.5
														56.2702	1255.79	1168.86	1158.01	1204.34	1200.51	1252.43	1176.87	1272.53	1279.46	1291.72	1275.59	1317.41
														56.3313	1258.25	1167.26	1156.08	1204.58	1202.27	1251.49	1176.62	1274.71	1278.13	1288.18	1278.07	1316
														56.3923	1254.01	1167.13	1154.82	1201.58	1198.65	1250.5	1175.3	1272.18	1276.56	1286.76	1275.16	1310.32
														56.4536	1256.93	1166.34	1156.49	1203.13	1200.66	1249.87	1178.09	1271.97	1276.67	1286.26	1274.19	1310.93
														56.5148	1257.64	1170.45	1159.14	1204.97	1202.49	1253.09	1178.48	1274.75	1282.6	1288.81	1275.53	1315.39
														56.5759	1259.91	1173.69	1159.93	1206.31	1204.48	1253.32	1179.12	1275.22	1283.09	1289.44	1279.32	1319.28
														56.6372	1257.24	1170.96	1160.67	1207.49	1205.31	1251.95	1180.73	1277.41	1284.31	1293.95	1280.03	1314.36
														56.6983	1255.66	1168.9	1157.77	1202.43	1201.43	1250.8	1178.03	1273.58	1280.06	1286.3	1274.02	1312.68
														56.7594	1255.98	1166.24	1153.58	1203.45	1199.91	1248.82	1176.5	1274.82	1277.84	1286.05	1274.81	1311.94
														56.8207	1256.45	1166.73	1158.28	1204.64	1201.59	1251.49	1177	1274.68	1276.97	1287.2	1273.66	1312.07
														56.8818	1256.36	1168.79	1158.52	1201.87	1200.09	1249.33	1177.51	1272.85	1278.31	1285.12	1276.28	1314.04
														56.9429	1260.37	1169.21	1160.2	1206.41	1202.72	1253.4	1179.33	1274.21	1279.26	1289.06	1277.98	1316.03
														57.0041	1262	1172	1161.56	1206.23	1205.44	1253.68	1180.66	1276.72	1283.01	1293.14	1277.02	1318.24
														57.0653	1258.53	1167.91	1156.55	1204.19	1198.84	1250.27	1178.77	1272.74	1279.54	1287.02	1278	1312.42
														57.1263	1259.71	1168.42	1156.39	1202.87	1201.07	1249.99	1176.35	1275.63	1280.14	1288.38	1275.82	1315.09
														57.1877	1259.46	1167.98	1158.67	1203.97	1200.54	1250.77	1177.64	1272.25	1279.74	1287.01	1274.14	1313.14
														57.2487	1258.28	1167	1158.26	1203.36	1200.06	1250.02	1177.11	1274.44	1279.57	1288.62	1275.2	1311.49
														57.3098	1255.21	1165.53	1153.8	1202.43	1199.92	1249.49	1177.44	1272.04	1278.15	1284.57	1273.09	1312.46
														57.3711	1252.9	1161.87	1151.85	1199.37	1195.88	1246.64	1171.64	1270.64	1274.19	1285.09	1271.64	1308.51
														57.4322	1255.68	1162.63	1151.4	1196.14	1196.83	1245.55	1171.33	1267.99	1273.6	1282.93	1270.37	1306.09
														57.4933	1255.19	1166.23	1158.83	1204.17	1200.56	1250.16	1178.08	1272.92	1276.14	1286.59	1276.2	1313.69
														57.5547	1263.26	1171.89	1159.21	1204.93	1206.11	1254.53	1180.28	1277.63	1282.84	1291.54	1278.68	1317.47
														57.6157	1259.41	1169.78	1156.25	1202.92	1202.29	1252.86	1178.76	1272.44	1279.92	1288.2	1276.7	1314.31
														57.6769	1255.25	1163.12	1153.89	1198.21	1195.53	1246.51	1172.04	1272.88	1274.02	1282.2	1271.14	1309.9
														57.7381	1257.03	1167.3	1156.13	1202.73	1197.76	1251.13	1176.68	1272.16	1277.02	1286.01	1277.51	1310.58
														57.7992	1260.19	1166.78	1155.07	1199.23	1198.75	1250.83	1176.31	1273.79	1279.6	1287.73	1275.31	1311.25
														57.8604	1263.27	1167.87	1159.88	1205.8	1201.16	1255.54	1179.09	1274.32	1280.21	1289.62	1279.49	1314.95
														57.9216	1260.02	1166.32	1156.37	1201.71	1201.5	1249.22	1175.03	1269.53	1275.25	1283.46	1272.73	1312.18
														57.9827	1259.22	1168.06	1156	1201.12	1199.29	1247.36	1174.87	1273.09	1275.45	1288.44	1274.71	1313.25
														58.0439	1255.18	1164.14	1152.32	1200.58	1197.95	1246.71	1174.02	1270.77	1273.17	1283.43	1271.6	1309.82
														58.105	1258.93	1167.19	1156.23	1203.51	1199.57	1250.41	1175.66	1273.23	1275.94	1283.43	1273.6	1309.62
														58.1663	1259.11	1164.51	1154.05	1203.36	1196.55	1249.41	1174.32	1272.1	1277.61	1285.12	1276.08	1313.33
														58.2274	1261.43	1165.75	1156.3	1200.83	1198.03	1248.97	1176.2	1272.49	1276.31	1285.63	1277.9	1313.97
														58.2886	1258.65	1166.91	1154.45	1203.9	1200.66	1250.89	1176.72	1274.09	1278.54	1285.62	1274.06	1309.65
														58.3497	1262	1165.1	1154.33	1202.23	1199.3	1249.57	1173.87	1272.39	1275.52	1287.48	1274.36	1312.54
														58.4108	1256.32	1162.32	1151.44	1198.88	1196.03	1244.01	1170.94	1265.63	1271.68	1280.2	1272.25	1306.59
														58.4719	1256.58	1164.38	1154.72	1200.15	1194.82	1248.46	1175.77	1270.71	1274.48	1280.87	1272.59	1310.04
														58.5333	1254.03	1163.31	1149.76	1196.37	1194.5	1244.7	1172.56	1270.47	1274.97	1279.4	1270.64	1305.91
														58.5944	1256.92	1165.72	1155.83	1199.55	1198.17	1247.96	1176.07	1269.92	1278.36	1285.16	1272.54	1309.9
														58.6554	1261.27	1167.19	1155.87	1204.12	1197.77	1248.21	1175.94	1272.44	1276.85	1282.98	1273	1312.15
														58.7167	1260.39	1165.79	1153.54	1201.25	1201.46	1250.61	1177.05	1273.98	1275.95	1284.9	1272.35	1314.54
														58.7778	1257.27	1162.41	1149.91	1197.76	1198.16	1246.03	1174.03	1267.98	1277.8	1279.3	1271.98	1309.43
														58.8389	1261.34	1166.29	1155.4	1200.32	1199.3	1250.55	1177.22	1273.1	1276.95	1284.74	1274.93	1314.17
														58.9001	1255.37	1162.77	1154.77	1198.51	1199.08	1247.66	1172.92	1266.05	1277.3	1281.91	1272.19	1311.16
														58.9613	1259.67	1163.33	1153.49	1198.39	1194.44	1247.12	1175.61	1269.68	1273.61	1281.84	1273.44	1310.29
														59.0225	1252.08	1161.07	1149.43	1197.32	1192.74	1244.29	1171.46	1265.56	1272.6	1281.45	1267.11	1305.51
														59.0836	1255.1	1159.04	1150.65	1197.44	1195.58	1247.11	1171.32	1266.74	1273.7	1280.93	1271.63	1307.31
														59.1447	1260.14	1166.04	1155.7	1202.44	1199.82	1250.43	1177.19	1269.27	1277.21	1281.86	1275.37	1309.82
														59.2059	1261.63	1167.89	1159.06	1201.68	1200.83	1249.44	1178.62	1272.92	1279.28	1286.35	1275.05	1312.58
														59.2672	1262.96	1168.43	1155.33	1201.27	1199.63	1248.68	1177.31	1271.64	1276.98	1282.14	1272.9	1311.5
														59.3282	1263.08	1169.85	1158.04	1201.31	1199.87	1249.8	1177.61	1274.67	1278.06	1286.08	1274.65	1313.94
														59.3893	1262.91	1166.27	1155.7	1201.33	1201.46	1250	1178.93	1273.75	1278.84	1287.08	1275.6	1313.96
														59.4505	1260.26	1166.18	1155.34	1201.63	1199.38	1248.74	1176.36	1272.71	1276.33	1286.26	1273.99	1313.16
														59.5119	1259.32	1165.01	1156.51	1199.13	1197.16	1247.1	1175.39	1269.99	1275.88	1281.18	1269.74	1308.1
														59.5729	1262.18	1166.44	1155.4	1200.24	1200.19	1248.44	1177.44	1272.6	1277.08	1281.86	1272.49	1312.48
														59.6342	1264.58	1168.76	1159.56	1204.39	1201.2	1254.13	1177.88	1272.31	1282.12	1287.09	1278.16	1317.33
														59.6952	1259.04	1166.98	1153.3	1202.26	1197.07	1249.43	1176.04	1271.16	1276.54	1280.66	1270.49	1309.34
														59.7564	1254.73	1162.43	1150.11	1195.53	1192.1	1244.11	1171.47	1266.06	1270.05	1279.88	1267.02	1305.86
														59.8175	1259.08	1163.5	1153.3	1198.92	1196.77	1247.47	1175.08	1271.59	1275.24	1281.36	1272.55	1310.61
														59.8788	1260.06	1163.91	1154.25	1198.89	1196.6	1248.1	1175.13	1272.63	1274.39	1281.82	1274	1309.51
														59.9399	1258.49	1167.08	1155.08	1199.37	1197.38	1250.12	1175.34	1272.59	1273.89	1282.49	1273.17	1310.34
														60.0011	1262.06	1165.04	1154.68	1200.2	1198.34	1251.27	1178.18	1273.99	1278.37	1284.17	1272.86	1313
														60.0623	1263.81	1168.22	1154.91	1205.55	1205.2	1253.43	1180.52	1275.42	1280.86	1286.03	1277.62	1315.23
														60.1235	1257.49	1164.27	1152.93	1200.84	1195.9	1246.67	1176.23	1272.24	1273.18	1285.18	1272.83	1311.96
														60.1846	1261.69	1164.11	1153.2	1199.16	1198.33	1251.06	1177.03	1270.08	1277.56	1283.93	1273.9	1311.7
														60.2458	1259.86	1165.71	1152.95	1197.91	1198.91	1249.32	1177.52	1270.77	1277.37	1283.14	1275.07	1312.62
														60.3068	1259.15	1162.64	1150.98	1197.47	1197.52	1246.72	1175.13	1271.81	1275.85	1279.61	1272.17	1308.88
														60.3682	1258	1162.36	1150.17	1198.46	1198.81	1244.35	1174.55	1268.95	1274.41	1278.93	1267.88	1308.54
														60.4293	1259.52	1160.91	1154.72	1196.56	1197.87	1247.08	1173.76	1269.87	1273.23	1279.55	1269.55	1309.03
														60.4904	1262.4	1165.02	1152.9	1198.6	1197.7	1249.83	1175.89	1267.89	1278.26	1280.27	1272.92	1310.2
														60.5516	1262.62	1166.19	1156.27	1203.32	1203.75	1252.21	1179.62	1271.76	1280.91	1284.15	1276.32	1312.15
														60.6128	1262.38	1164.27	1151.45	1198.82	1197.08	1248.38	1176.11	1268.87	1276.47	1286.37	1272.02	1310.08
														60.6739	1256.79	1165.83	1156.03	1200.11	1201.32	1249.92	1177.27	1273.52	1276.21	1282.71	1272.18	1311.18
														60.735	1257.34	1162.49	1154.32	1198.68	1196.88	1245.73	1175.62	1267.97	1275.77	1280.8	1274.09	1310.88
														60.7965	1258.21	1162.41	1153.56	1198.77	1197.82	1247.16	1175.85	1270.85	1274.99	1280.81	1269.38	1313.4
														60.8573	1256.22	1158.55	1150.49	1194.92	1194.31	1244.66	1170.9	1265.94	1270.43	1276.85	1268.46	1306.8
														60.9183	1255.46	1163.19	1151.09	1195.14	1196.22	1245.4	1171.82	1267.53	1274.29	1279.02	1267.35	1306.19
														60.9798	1259.39	1164.78	1154.51	1199.09	1197.3	1246.15	1175.36	1273.02	1276.71	1280.76	1271.45	1309.66
														61.0409	1255.93	1159.54	1147.95	1195.1	1195.31	1247.67	1172.98	1271.29	1274.85	1282.39	1271.27	1309.27
														61.102	1256.1	1160.73	1150.16	1194.39	1191.77	1244.36	1174.98	1265.38	1273.86	1280.01	1270.62	1307.98
														61.1632	1255.42	1162.19	1149.41	1194.68	1192.66	1246.25	1173.25	1267.03	1273.13	1280.46	1268.78	1306.47
														61.2243	1256.16	1161.89	1150.45	1194.34	1194.38	1245.31	1173.09	1268.74	1271.75	1278.83	1269.11	1309.04
														61.2854	1258.52	1163.27	1155.9	1200.93	1198.34	1250.46	1176.93	1275.06	1275.83	1282.21	1272.45	1309.7
														61.3467	1259.3	1162.23	1154.67	1197.79	1195.59	1245.05	1175.34	1270.06	1274.09	1283.84	1271.14	1311.26
														61.4079	1253.23	1158.79	1145.39	1192.72	1191.09	1240.42	1171.01	1265.06	1271.25	1274.41	1267.26	1305.92
														61.4689	1255.43	1161.48	1150.01	1196.71	1194	1243.9	1173.54	1267.57	1274.99	1279.49	1269.98	1309.51
														61.5302	1255.52	1160.94	1149.79	1196.33	1192.4	1246.22	1172.33	1268.04	1273.41	1281.75	1269.85	1308.04
														61.5914	1256.7	1162.95	1148.8	1194.36	1194.39	1243.97	1175.36	1269.19	1272.31	1279.19	1268.94	1306.43
														61.6523	1254.56	1162.2	1148.41	1197.07	1194.43	1243.63	1173.18	1265.94	1272.15	1279.09	1267.97	1303.39
														61.7137	1256.05	1159.17	1146.95	1192.13	1192.69	1241.83	1172.22	1264.76	1272.08	1277.16	1266.6	1304.8
														61.7748	1255.28	1157.78	1148.84	1194.15	1194.44	1244.09	1172.25	1266.69	1272.24	1274.43	1268.3	1304.71
														61.8358	1253.69	1159.88	1149.33	1196.53	1194.14	1243.39	1173.06	1266.2	1272.47	1275.17	1266.77	1305.38
														61.8972	1257.79	1164.52	1151.83	1197.47	1195.91	1248.32	1175.75	1270.26	1276.03	1278.36	1268.68	1309.31
														61.9584	1261.44	1163.78	1155.19	1197.98	1196.87	1246.37	1178.55	1273.65	1278.01	1280.19	1271.03	1309.03
														62.0194	1256.59	1160.17	1148.72	1194.63	1192.59	1242.4	1172.86	1268.86	1272.97	1278.54	1268.74	1308.44
														62.0808	1256.48	1160.38	1149.82	1193.24	1195.32	1243.2	1173.06	1267.29	1271.13	1277.75	1265.7	1307.3
														62.1417	1259.53	1165.1	1153.34	1198.2	1197.04	1245.62	1176.49	1272.1	1275.84	1282.52	1270.71	1309.21
														62.2029	1259.77	1164.17	1153.64	1195.27	1197.26	1247.26	1176.53	1271.53	1275.74	1281.06	1272.2	1308.39
														62.2641	1259.29	1163.52	1151.76	1195.14	1194.57	1248.01	1173.78	1267.93	1273	1281.57	1271.05	1307.79
														62.3254	1258.5	1158.71	1149.55	1196.63	1192.23	1242.69	1172.88	1265.8	1274.12	1276.35	1269.33	1305.58
														62.3865	1265.27	1165.21	1154.61	1199.55	1200.07	1249.52	1178.81	1275.3	1277.39	1284.71	1273.43	1314.06
														62.4476	1258.95	1162.37	1152.93	1197.34	1196.68	1249.03	1175.99	1267.93	1275.51	1281.88	1272.65	1307.62
														62.5088	1255.52	1160.23	1150.09	1197.79	1196.96	1247.26	1173.02	1267.61	1274.75	1279.53	1268.33	1306.15
														62.5698	1256.32	1162.45	1149.59	1196.11	1192.15	1246.48	1174.47	1268.44	1272.49	1278.17	1269.34	1309.42
														62.6311	1255.29	1161.49	1150.09	1197.08	1195.29	1240.99	1173.72	1267.79	1272	1279.15	1265.1	1309.91
														62.6922	1255.49	1160.54	1146.87	1192.62	1192.26	1242.41	1174.52	1268.07	1269.25	1276.15	1266.24	1305.53
														62.7533	1259.48	1161.92	1150.9	1195.12	1193.92	1245.44	1175.69	1266.51	1273.97	1280.36	1271.14	1310.5
														62.8145	1256.69	1159.85	1149.52	1196.19	1192.94	1244.54	1174.43	1266.95	1272.88	1279.2	1269.61	1307.38
														62.8757	1258.13	1160.21	1149.37	1193.41	1192.85	1246.4	1175.53	1265.91	1272.58	1278.91	1267.79	1305.71
														62.9369	1257.58	1159.03	1148.22	1194.03	1195.09	1243.01	1172.98	1266.75	1271.27	1277.29	1266.84	1304.26
														62.998	1259.58	1163.06	1150.53	1197.77	1195.22	1246.78	1177.27	1270.78	1276.83	1278.56	1271	1310.24
														63.0592	1254.58	1159.43	1149.26	1194.76	1193.49	1242.87	1173.14	1267.19	1265.91	1277.73	1267.33	1305.72
														63.1204	1255.06	1161.07	1152.55	1197.23	1196.51	1244.18	1176.27	1267.14	1274.54	1281.16	1271.45	1308.03
														63.1814	1257.55	1160.03	1152.73	1198.34	1194.36	1245.71	1177.3	1268.43	1276.33	1282.07	1269.43	1310.56
														63.2427	1258.65	1163.7	1149.9	1195.24	1195.1	1246.6	1174.1	1269.08	1274.5	1280.84	1270.34	1307.84
														63.3038	1250.4	1158.23	1148.53	1193.71	1192.34	1241.8	1172.29	1265.64	1271	1275.75	1266.38	1305.01
														63.365	1252.17	1159.68	1145.09	1192.6	1190.62	1240.44	1173.38	1263.76	1269.91	1275.59	1265.69	1302.79
														63.4262	1252.69	1155.87	1145.6	1190.89	1189.13	1241.16	1170.13	1263.81	1269.5	1273.37	1264.61	1303.45
														63.4873	1253.21	1160.25	1149.68	1196.04	1191.93	1245.01	1173.2	1267.96	1274.83	1277.33	1268.62	1306.41
														63.5484	1254.33	1161.42	1152.2	1193.49	1192.4	1243.21	1175.18	1267.43	1273.3	1275.19	1267.28	1306.55
														63.6097	1258.87	1160.53	1149.19	1197.48	1192.89	1244.48	1173.24	1268.77	1273.52	1277.2	1268.23	1306.58
														63.6708	1254.9	1158.38	1148.77	1193.45	1191.84	1242.41	1172.72	1266.52	1268.11	1274.3	1267.18	1306.31
														63.7319	1256.47	1159.36	1147.1	1193.71	1192.81	1241.88	1171.84	1266.86	1272.29	1273.28	1268.27	1306.41
														63.7932	1253.49	1161.6	1149.17	1195.48	1194.96	1241.75	1174.4	1265.54	1269.16	1276	1267.45	1306.88
														63.8544	1258.12	1158.95	1148.3	1192.6	1192.78	1243.9	1175.8	1270.27	1272.89	1276.85	1265.08	1304.87
														63.9155	1257.22	1162.2	1149.36	1192.73	1191.84	1241.73	1176.14	1269.27	1270.6	1276.31	1268.58	1309.23
														63.9767	1255.85	1163.19	1149.14	1194.85	1195.81	1245.58	1175.14	1268.25	1275.86	1279.53	1271.06	1308.28
														64.0379	1253.93	1159.8	1147.97	1195.55	1191.64	1242.6	1174.63	1268.79	1274	1276.97	1269.15	1305.47
														64.0989	1253.83	1161.1	1149.21	1196.4	1189.59	1242.33	1175.7	1268.5	1272.34	1277.7	1267.78	1306.15
														64.1603	1253	1158.35	1147.43	1191.41	1191.19	1242.92	1172.43	1264.95	1272.1	1274.45	1266.41	1305.01
														64.2213	1252.62	1157.8	1145.44	1191.8	1194.08	1239.13	1173.5	1264.38	1270.77	1274.03	1264.73	1304.63
														64.2825	1252.27	1159.98	1147.69	1193.16	1195.87	1241.51	1173.06	1266.06	1272.11	1274.63	1264.81	1305.01
														64.3438	1254.51	1159.92	1148.47	1195.97	1193.06	1244.16	1173.81	1268	1273.92	1276.2	1267.57	1307.8
														64.4048	1255.57	1158.69	1147.87	1195.15	1193.46	1244.33	1174.52	1267.65	1271.56	1275.95	1267.51	1305.26
														64.466	1255.29	1163.09	1148.76	1198.45	1193.53	1246.01	1175.61	1266.06	1272.64	1277.04	1267.3	1306.13
														64.5272	1254.77	1160.65	1148.94	1195.93	1189.51	1238.93	1173.52	1263.26	1269.12	1274.5	1267.52	1302.8
														64.5883	1252.36	1155.13	1146.46	1189.42	1188.73	1239.15	1174	1263.84	1269.7	1272.47	1266.35	1303.3
														64.6494	1253.37	1158.36	1146.82	1193.13	1192.22	1241.45	1172.3	1263.71	1270.32	1273.3	1262.29	1302.01
														64.7107	1254.21	1160.35	1148.94	1194.87	1197.58	1245.88	1176.83	1268.82	1275.65	1279.71	1267.02	1309.23
														64.7718	1255.28	1159.78	1148.36	1193.25	1192.38	1242.23	1174.32	1267.45	1271.97	1275.79	1268.75	1305.6
														64.833	1252.28	1157.83	1147.4	1192.52	1190.29	1240.05	1171.95	1263.74	1269.52	1273.14	1269.12	1306.37
														64.8941	1254.75	1157.95	1147.81	1193.19	1190.86	1243.24	1172.72	1264.81	1271.44	1274.71	1266.38	1306.92
														64.9553	1255.44	1159.31	1144.2	1192.76	1189.81	1240.95	1172.72	1266.88	1270.01	1272.96	1264.49	1304.07
														65.0164	1254.04	1159.26	1147.18	1192.38	1191.76	1241.93	1173.98	1263.1	1271.4	1274.54	1266.31	1308.05
														65.0776	1251.8	1158.27	1146.2	1192.07	1193.86	1241.69	1172.96	1268.12	1270.99	1274.54	1268.18	1306.09
														65.1387	1256.9	1161.36	1150.45	1196.12	1195.33	1243.47	1176.64	1268.64	1273.58	1278.98	1269.78	1304.12
														65.1999	1256.1	1162.85	1153.94	1195.05	1194.73	1247.34	1177.66	1268.54	1275.15	1276.2	1270.63	1310.08
														65.2609	1253.15	1159.66	1150	1190.74	1189.52	1241.64	1173.45	1266.6	1272.03	1275.51	1265.61	1304.44
														65.3223	1259.04	1161.75	1148.56	1195.01	1194.85	1245.96	1177.11	1269.4	1272.56	1278.09	1269.44	1304.82
														65.3835	1256.29	1162.3	1149.24	1191.43	1192.61	1243.89	1176.83	1268.1	1271.97	1276.38	1267.96	1306.4
														65.4446	1251.73	1156.63	1148.55	1192.68	1190.82	1242.35	1173.34	1267.08	1269.7	1273.75	1265.15	1303.12
														65.5057	1250.31	1160.33	1147.16	1192.66	1190.95	1240.99	1172.85	1267.87	1269.35	1275.04	1266.39	1305.59
														65.5669	1256.4	1162.03	1148.16	1197.44	1192.95	1245.12	1174.79	1267.07	1271.12	1277.24	1268.41	1306.34
														65.628	1250.95	1157.81	1147.28	1193.22	1188.47	1242.14	1171.91	1263.72	1271.6	1273.1	1266.59	1304.28
														65.6893	1254.51	1156.57	1148.25	1193.09	1189.8	1243.25	1172.74	1266.47	1270.66	1275.17	1266.9	1304.3
														65.7504	1252.99	1158.87	1148.39	1190.98	1194.02	1241.48	1173.29	1265.51	1271.91	1271.64	1264.34	1303.73
														65.8115	1253.3	1158.57	1148.12	1193.04	1193.41	1240.36	1175.19	1268.28	1271.17	1274.22	1266.27	1306.92
														65.8728	1252.17	1157.38	1145.84	1190.17	1189.77	1239.55	1170.88	1261.41	1269	1273.04	1264.8	1302.71
														65.9339	1252.15	1155.8	1146.1	1191.08	1190.29	1242.69	1172.02	1262.96	1269.08	1273.01	1264.27	1303.83
														65.995	1251.49	1153.68	1144.44	1186.51	1187.26	1239.84	1170.19	1258.73	1267.22	1272.47	1262.51	1304.59
														66.0563	1253.87	1156.76	1146.06	1192.5	1190.29	1239.04	1172.47	1264.6	1269.56	1271.95	1265.06	1303.39
														66.1174	1250.95	1155.73	1146.35	1187.54	1188.38	1237.71	1171.17	1263.33	1264.7	1269.97	1262.67	1302.65
														66.1785	1252.55	1157.62	1148.32	1192.24	1190.03	1242.18	1173.3	1263.87	1270.2	1273.96	1265.67	1304.81
														66.2397	1256.39	1160.48	1150.53	1198.07	1192.6	1246.61	1176.71	1267.51	1273.08	1274.76	1267.01	1306.39
														66.3009	1255.76	1157.02	1145.92	1193.07	1190.24	1242.68	1173.66	1266.3	1270	1272.97	1264.02	1304.91
														66.3621	1247.89	1154.02	1144.13	1188.75	1189.17	1237.25	1170.4	1263.24	1267.23	1272.18	1261.3	1297.62
														66.4232	1249.44	1154.29	1145.32	1186.96	1188.46	1241.29	1171.87	1262.3	1268.26	1269	1263.62	1302.11
														66.4844	1246.64	1153.3	1140.88	1187.47	1185.42	1237.67	1166.65	1258.41	1264.92	1265.74	1259.14	1297.05
														66.5455	1248.62	1152.66	1144.89	1188.76	1187.7	1237.24	1171.3	1260.93	1267.17	1268.55	1261.97	1302.05
														66.6067	1253.18	1158.13	1149.41	1191.62	1189.37	1242.54	1173.65	1266.87	1273.64	1272.69	1266.81	1304.97
														66.6679	1254.49	1159.7	1146.13	1192.77	1191.07	1242.18	1176.23	1269.44	1270.17	1274.98	1266.31	1307.08
														66.7289	1251.21	1154.92	1142.71	1188.91	1189.19	1239.48	1170.79	1262.06	1265.1	1270.38	1262.05	1300.2
														66.7902	1250.87	1155.56	1146.67	1189.08	1186.18	1239.44	1172.13	1260.56	1268.32	1270.08	1264.2	1301.11
														66.8513	1249.42	1153.31	1145.58	1189.16	1188.14	1236.66	1169.01	1262.97	1267.37	1271.66	1262.23	1301
														66.9124	1250.32	1153.59	1145.49	1187.06	1187.9	1238.57	1170.21	1266.73	1266.41	1266.92	1264.46	1302.57
														66.9736	1252.15	1157.37	1144.43	1189.12	1189.61	1242.04	1170.99	1260.96	1269.04	1269.59	1261.08	1300.09
														67.035	1247.3	1154.39	1141.63	1186.91	1187.94	1237.06	1167.99	1260.74	1263.78	1268.98	1261	1299.13
														67.096	1247.8	1151.08	1141.96	1184.72	1185.09	1237.98	1167.06	1260.47	1264.85	1268.62	1260.08	1299.88
														67.157	1249.93	1157.89	1144.25	1188.36	1192.08	1241.56	1170.64	1261.91	1268.34	1273.94	1266.92	1302.12
														67.2183	1248.66	1154.67	1145.95	1189.64	1187.79	1239.04	1171.89	1260.79	1266.29	1272.17	1264.69	1301.88
														67.2795	1250.72	1154.94	1142.15	1186.38	1188.25	1240.35	1171.12	1266.04	1266.37	1269.31	1262.02	1298.32
														67.3406	1248.18	1152.61	1141.59	1186.73	1184.92	1236.79	1167.31	1259.47	1264.41	1267.03	1258.61	1300.55
														67.402	1251.75	1155.76	1148.19	1188.79	1188.26	1241.11	1172.54	1260.22	1269.46	1271.03	1265	1301.77
														67.4631	1255.03	1157.35	1148.19	1191.22	1189.79	1241.66	1174.6	1265.63	1270.09	1274.81	1266.41	1306.05
														67.5241	1251.93	1156.3	1143.7	1191.16	1188.83	1241.78	1172.8	1264.4	1270.66	1274.4	1264.42	1302.78
														67.5854	1249.49	1152.14	1142.91	1187.17	1187.13	1236.42	1170.86	1263.49	1268.01	1267.03	1260.97	1300.8
														67.6464	1249.38	1155.88	1143.67	1191.19	1188.1	1241.65	1171.26	1260.95	1267.96	1271.31	1262.07	1303.93
														67.7075	1249.68	1158.13	1146.83	1193.33	1191.31	1242.7	1172.79	1264.78	1272.74	1274.11	1266.42	1305.67
														67.7687	1253.3	1157.82	1147.69	1192.47	1189.92	1245.37	1173.69	1267.41	1270.85	1277.02	1267.97	1306.51
														67.83	1250.07	1156.11	1145.18	1188.58	1187.2	1240.01	1172.15	1265.02	1267.06	1271.76	1268.49	1301.53
														67.891	1250.09	1157.89	1146.97	1191.28	1190.24	1240.9	1172.11	1263.87	1270.92	1271.6	1262.52	1304.37
														67.9523	1250.52	1155.51	1145.07	1189.35	1192.25	1238.1	1171.29	1261.23	1267.75	1270.91	1262.37	1300.55
														68.0134	1249.59	1156.86	1147.5	1190.22	1188.64	1242.52	1173.5	1263.1	1268.57	1276.24	1265.98	1302.48
														68.0745	1253.45	1156.37	1146.76	1190.39	1188.6	1237.11	1173.1	1263.1	1268.87	1273.24	1260.95	1303.78
														68.1358	1252.39	1157.56	1145.83	1189.78	1190.24	1239.84	1171.94	1262.09	1267.86	1273.39	1265.56	1303.6
														68.1969	1248.52	1154.26	1143.6	1186.76	1184.42	1238	1170.73	1260.04	1266.56	1268.77	1262.24	1300.33
														68.2581	1246.77	1152.63	1140.88	1185.37	1185.1	1237.07	1169.12	1259.51	1264.25	1269.61	1261.84	1300.74
														68.3193	1250.21	1155.34	1145.38	1187.85	1188.46	1238.59	1169.52	1261.75	1268.03	1268.81	1264.5	1301.64
														68.3804	1249.28	1154.21	1143.56	1188.89	1189.76	1239.64	1171.38	1261.82	1267.38	1269.96	1262.21	1303.14
														68.4415	1245.2	1152.38	1139.19	1185.83	1183.39	1237.48	1168.32	1259.65	1263.25	1267.33	1259.57	1299.02
														68.5028	1245.16	1149.05	1138.39	1181.31	1182.3	1233.25	1167	1258.3	1262.85	1267.84	1257.71	1294.29
														68.5639	1247.82	1152.51	1142.56	1186.8	1187.69	1237.18	1168.83	1259.79	1263.57	1268.81	1261.41	1299.66
														68.625	1245.96	1153.61	1145.25	1189.32	1187.36	1240.76	1170.72	1262.79	1266.86	1271.9	1262.7	1302.3
														68.6863	1249.5	1157.05	1144.86	1188.54	1189.13	1239.37	1170.73	1265.65	1270.08	1273.97	1264.79	1302.61
														68.7474	1252.42	1159.21	1146.37	1192.21	1189.81	1239.68	1171.86	1263.48	1271.31	1272.83	1265.6	1303.1
														68.8085	1245.93	1152.91	1145.11	1188.54	1188.26	1239.76	1169.39	1257.99	1268.05	1269.94	1261.94	1302.66
														68.8698	1246.48	1155.1	1143.86	1185.94	1184.02	1239.63	1171.06	1260.44	1267.25	1271.12	1262.54	1301.14
														68.9309	1250.61	1158.83	1146.07	1190.61	1188.61	1239.77	1171.75	1265.28	1270.85	1271.1	1264.72	1306.59
														68.992	1251.84	1156.3	1147.27	1190.67	1192.13	1242.71	1172.59	1264.96	1271.35	1274.17	1262.81	1301.9
														69.0532	1247.9	1154.95	1146.39	1188.66	1187.24	1240.03	1171.83	1260.76	1268.74	1271.71	1262.17	1303.51
														69.1144	1241.12	1152.75	1144.42	1184.92	1185.91	1238.55	1167.91	1257.13	1266.24	1267.98	1260.65	1298.74
														69.1755	1249.05	1152.16	1141.64	1186.85	1187.49	1237.24	1170.06	1262.55	1265.76	1269.3	1260.16	1300.67
														69.2367	1246.92	1153.72	1141.27	1187.22	1185.41	1239.74	1170.56	1261.91	1265.2	1268.91	1262.18	1299.61
														69.2979	1245.49	1151.39	1142.91	1187.32	1184.09	1237.68	1168.41	1261.66	1266.82	1270.53	1259.13	1298.87
														69.3589	1247.25	1153.6	1142.85	1187.06	1186.39	1237.75	1166.99	1261.41	1263.93	1269.06	1256.47	1300.37
														69.4201	1249.49	1153.49	1143.87	1190.57	1186.85	1236.37	1169.84	1260.82	1266.8	1273.15	1260.49	1302.23
														69.4814	1252.54	1158.16	1148.18	1190.98	1192.12	1242.86	1173.58	1265.35	1269.98	1273.31	1263.61	1305.18
														69.5424	1248.46	1153.85	1145.49	1189.24	1188.43	1243.67	1172.73	1265.36	1270.68	1272.91	1266.6	1303.07
														69.6036	1251.81	1155.84	1147.93	1189.29	1186.66	1240.37	1172.41	1263.36	1267.99	1274.3	1265.77	1303.29
														69.6649	1248.04	1151.59	1145.55	1189.61	1190.68	1240.42	1170.22	1262.97	1267.11	1268.99	1262.34	1299.03
														69.7259	1248.11	1153.97	1143.74	1188.29	1188.77	1238.69	1170.63	1261.55	1268.11	1273.19	1262.51	1303.26
														69.7871	1249.3	1152.2	1144.9	1187.82	1186.09	1240.25	1169.7	1261.17	1266.28	1270.6	1262.09	1302.23
														69.8483	1251.44	1154.55	1143.88	1190.25	1186.18	1239.21	1171.83	1260.99	1268.21	1271.57	1264.32	1302.65
														69.9095	1247.96	1151.99	1143.91	1189.47	1188.86	1236.98	1169.89	1262.75	1266.58	1272.17	1262.82	1302.16
														69.9707	1248.42	1151.85	1143.4	1190.08	1183.35	1238.27	1169.39	1263.63	1267.26	1270.19	1262.31	1302.92
														70.0319	1248.97	1155.2	1143.36	1188.23	1185.18	1238.64	1170.29	1258.1	1267.79	1272.41	1261.05	1300.97
														70.093	1250.36	1154.63	1143.81	1189.48	1190.09	1241.55	1174.31	1263.55	1267.67	1271.57	1263	1303.2
														70.1542	1248.74	1153.62	1145.28	1189.38	1190.03	1239.56	1172.46	1262.23	1267.59	1269.96	1262.43	1300.41
														70.2153	1247.11	1153.15	1144.05	1185.06	1183.31	1237.79	1166.93	1258.96	1263.64	1269.27	1258.9	1300.09
														70.2764	1249.39	1152.65	1144.07	1186.11	1183.85	1238.51	1169.75	1261.69	1266.03	1266.77	1258.78	1298.18
														70.3376	1246.26	1151.81	1141.5	1188.46	1182.84	1237.72	1169.77	1261.5	1266.36	1268.31	1259.31	1301.05
														70.3989	1247.91	1150.62	1140.95	1185.75	1184.89	1238.57	1169.79	1261.36	1265.98	1269.35	1261.07	1298.05
														70.4599	1249.66	1151.98	1143.92	1187.7	1186.14	1237.08	1171.98	1264.01	1267.65	1268.62	1263.34	1301.59
														70.5211	1249.07	1154.39	1143.33	1188.14	1186.32	1238.13	1171.3	1263.05	1267.92	1270.98	1263.06	1301.23
														70.5824	1250.37	1153.7	1142.37	1185.64	1186.98	1236.36	1171.73	1262.99	1265.66	1270.89	1261.81	1299.73
														70.6434	1248.4	1152.87	1145.07	1184.24	1182.49	1237.94	1167.66	1258.02	1265.24	1270.13	1259.2	1299
														70.7046	1247.43	1150.15	1142.6	1186.66	1185.4	1238.4	1170.52	1261.9	1266.09	1268.98	1258.4	1298.13
														70.7658	1245.44	1150.45	1140.19	1185.13	1183.33	1236.23	1168.01	1261.16	1264.24	1268.85	1260.48	1298.99
														70.827	1248.42	1153.06	1143.04	1189.5	1185.8	1239.69	1170.71	1259.45	1265.98	1270.57	1264.06	1300.92
														70.8881	1254.94	1155.73	1142.12	1190.83	1188.39	1241.93	1172.8	1264.41	1267.48	1270.79	1265.45	1301.72
														70.9494	1249.14	1153.35	1142.24	1185.38	1188.32	1239.3	1170.4	1261.41	1267.88	1268.37	1262.87	1301.85
														71.0104	1246.01	1148.28	1141.38	1182.8	1184.64	1234.72	1167.52	1257.68	1263.49	1266.91	1256.53	1296.71
														71.0717	1248.67	1154.39	1143.99	1187.1	1185.36	1237.48	1169.38	1261.01	1269.6	1266.31	1259.93	1299.11
														71.1329	1247.27	1150.93	1142.84	1187.5	1186.24	1235.87	1170.11	1258.64	1265.41	1267.44	1259.78	1298.83
														71.1938	1247.99	1153.98	1140.93	1184.12	1186.68	1237.5	1171.28	1261.26	1264.05	1267.24	1258.88	1301.44
														71.2551	1250.42	1153.27	1143.3	1186.64	1188.64	1238.47	1171.61	1262.82	1268.36	1268.54	1261.52	1301.62
														71.3161	1248.25	1155.7	1140.7	1188.45	1186.93	1236.02	1170.87	1262.68	1266.74	1270.92	1262.11	1299.57
														71.3773	1243.13	1151.79	1140.97	1184.22	1182.64	1233.52	1167.9	1258.54	1265.06	1266.27	1257.49	1298.03
														71.4385	1245.15	1148.65	1141.48	1185.27	1184.23	1234.75	1166.63	1258.89	1262.5	1265.45	1259.34	1297.76
														71.4997	1248.76	1150.42	1141.54	1183.76	1184.75	1238.47	1169.76	1261.03	1265.66	1266.85	1259.76	1300.92
														71.5609	1246.39	1152.26	1141.83	1185.01	1185.15	1237.14	1168.79	1259.35	1264.61	1269.8	1258.99	1299.65
														71.622	1244.84	1151.84	1138.95	1183.25	1183.74	1233.29	1168.06	1258.37	1266.62	1266.07	1256.9	1298.21
														71.6831	1248.21	1150.31	1140.67	1186.09	1183.68	1236.47	1169.73	1260.31	1264.37	1265.89	1261.35	1301.32
														71.7444	1244.13	1153.17	1141.64	1188.77	1185.67	1237.04	1169.93	1261.32	1264.17	1268.84	1260.14	1300.01
														71.8055	1248.41	1151.92	1143.24	1187.92	1185.84	1239.34	1172.32	1263.69	1264.91	1269.96	1261.74	1300.4
														71.8667	1249.93	1150.37	1143.53	1189.3	1187.59	1236.66	1170.97	1261.83	1265.21	1270.69	1260.98	1303.71
														71.9279	1247.24	1154.36	1142.34	1186.09	1186.08	1239.59	1172.11	1262.56	1267.18	1272.54	1261.69	1301.05
														71.989	1241.25	1148.93	1140.59	1184.07	1183.9	1233.8	1168.8	1260.67	1264.36	1266.69	1258.29	1300.18
														72.0502	1244.15	1147.41	1142.05	1185.05	1182.22	1232.9	1167.78	1257.92	1261.66	1266.59	1257.96	1294.25
														72.1114	1246.51	1152.62	1143.45	1184.8	1185.6	1238.18	1170.01	1261.33	1267.42	1269.68	1260.03	1300.05
														72.1726	1251.13	1156.11	1146.43	1187.84	1189.57	1240.25	1173.77	1261.62	1270.17	1270.95	1263.13	1302.83
														72.2337	1246.02	1151.34	1141.83	1181.5	1182.3	1236.3	1167.22	1258.93	1265.54	1264.08	1259.88	1298.47
														72.2948	1242.95	1150.26	1140.85	1184.38	1181.04	1234.7	1167.03	1256.91	1263.35	1268.56	1257.45	1299.02
														72.356	1247.98	1155.2	1142.75	1188.39	1185.72	1239.93	1173	1264.32	1265.89	1270.9	1264.31	1302.01
														72.4171	1250.24	1157.68	1145.56	1190	1189.16	1240.7	1175	1265.35	1269.74	1272.8	1264.92	1304.4
														72.4784	1245.59	1152.86	1141.48	1184.73	1183.39	1232.93	1169.48	1261.1	1262.18	1265.78	1261.2	1297.95
														72.5395	1244.54	1150.62	1142.11	1184.07	1183.45	1236.54	1169.37	1262.6	1264.01	1264	1257.35	1299.85
														72.6006	1245.39	1151.66	1142.51	1182.34	1183.69	1234.01	1168.23	1260.11	1264.62	1267.69	1257.29	1298.62
														72.6618	1248.01	1154.38	1145.04	1188.25	1186.94	1241.34	1173.04	1264.69	1267.36	1272.87	1264.37	1303
														72.723	1250.85	1153.82	1145.17	1189.32	1186.16	1239.74	1172.54	1262.39	1268.62	1269.67	1263.82	1300.3
														72.7841	1249.85	1156.23	1145.51	1189.19	1191.91	1242.97	1174.1	1265.36	1271.56	1273.12	1266.31	1303.59
														72.8453	1247.21	1152.44	1142.76	1187.51	1188.4	1235.86	1170.83	1260.57	1265.26	1272.1	1262.95	1301.19
														72.9064	1242.74	1147.47	1140.3	1182.3	1180.37	1231.4	1166.47	1258.62	1263.02	1264.17	1255.08	1296.65
														72.9677	1239.55	1144.41	1134.86	1179.68	1180.54	1230.69	1163.81	1254.94	1259.32	1262.08	1255.33	1293.32
														73.0289	1245.94	1152.28	1139.85	1182.78	1182.79	1234.11	1167.11	1258.63	1264.18	1268.08	1260.1	1299.04
														73.09	1243.55	1152.37	1142.29	1183.98	1186.24	1235.38	1169.8	1259.45	1265.46	1266.2	1258.76	1299.1
														73.1512	1243.26	1151.41	1137.91	1184.43	1183.27	1233.4	1167.55	1259.55	1266.16	1268.05	1256.15	1296.43
														73.2123	1241.01	1145.78	1139.94	1181.77	1183.15	1233.55	1167.43	1259.54	1263.1	1264.06	1258.14	1297.77
														73.2735	1240	1146.74	1138.92	1179.56	1177.35	1230.2	1166.44	1256.52	1259.77	1262.35	1254.64	1293.82
														73.3347	1244.28	1149.8	1140.91	1184.03	1182.68	1237.59	1168.75	1257.96	1262.38	1268.26	1260.69	1298.8
														73.3957	1243.68	1148.82	1141.85	1187.87	1185.67	1237.53	1170.7	1261.21	1263.87	1266.94	1257.27	1299.7
														73.457	1245.44	1149.88	1141.24	1187.49	1184.7	1239.22	1170.47	1261.12	1267.23	1267.67	1260.04	1299.08
														73.518	1248.74	1151.76	1140.52	1186.36	1181.99	1236.81	1169.29	1260.54	1264.58	1267.47	1258.61	1300.58
														73.5791	1241.47	1146.53	1140.86	1185.4	1181.32	1231.56	1166.42	1259.34	1264.96	1265.61	1255.88	1294.84
														73.6405	1243.29	1151.78	1142.58	1183.91	1183.73	1235.68	1168.1	1261.14	1265.8	1268.14	1261.64	1299.36
														73.7016	1241.77	1149.8	1141.32	1183.78	1181.95	1236.23	1167.9	1260.4	1263.84	1263.8	1257.83	1297.17
														73.7629	1240.33	1148.22	1139.94	1180.92	1180.84	1233.11	1167.31	1258.66	1262.11	1262.63	1256.02	1293.88
														73.8239	1244.75	1151.95	1141.28	1184.25	1185.15	1238.85	1170.94	1258.95	1266.95	1267.65	1263.71	1300.66
														73.8851	1245.45	1149.25	1143.43	1187.99	1185.71	1236.98	1172.08	1262.82	1266.66	1269.08	1261.31	1302.33
														73.9462	1240.92	1146.54	1135.67	1181.26	1180.39	1230	1165.74	1255.49	1262.08	1262.11	1258.57	1294.07
														74.0074	1241.35	1148.06	1139.43	1182.5	1179.56	1235.23	1168.67	1258.49	1263.51	1267.07	1256.67	1297.04
														74.0686	1244.01	1149	1141.5	1185.33	1183.78	1236.68	1168.79	1260.07	1265.33	1266.57	1259.57	1299.09
														74.1297	1244.52	1149.76	1138.93	1184.75	1183.54	1237.33	1170.49	1261.75	1267.1	1265.05	1261.28	1299.19
														74.1909	1240.78	1148.53	1139.29	1183.08	1182.14	1233.05	1166.9	1257.03	1265.9	1263.02	1256.28	1297.07
														74.2521	1242.39	1149.38	1140.18	1184.62	1182.21	1234.12	1168.31	1257.25	1263.61	1267.65	1257.03	1299.11
														74.3131	1247.95	1154.64	1142.69	1186.45	1187.73	1235.04	1170.57	1262.37	1270.35	1268.02	1260.89	1301.47
														74.3744	1243.77	1152.87	1140.67	1184.7	1183.89	1235.32	1168.83	1259.69	1266.78	1268.06	1258.11	1297.15
														74.4356	1241.04	1149.62	1138.44	1180.07	1181.57	1233.42	1167.66	1258.76	1262.77	1262.36	1258.64	1297.51
														74.4967	1240.14	1145.66	1140.61	1178.23	1177.75	1234.25	1165.77	1257.63	1261.3	1262.6	1253.91	1292.91
														74.5579	1244.36	1147.52	1140.72	1182.87	1184.01	1233.39	1166.92	1255.62	1262.8	1262.66	1256.3	1296.94
														74.6191	1239.8	1148.74	1140.19	1181.32	1179.41	1234.45	1166.62	1255.39	1259.48	1261.28	1257.01	1294.61
														74.6801	1240.44	1149.63	1139.56	1182.16	1182.22	1234.82	1167.24	1254.35	1263.07	1263.5	1253.59	1294.97
														74.7414	1247.75	1153.21	1142.9	1183.83	1185.07	1239.76	1172.98	1260.83	1267.33	1268.87	1259.88	1298.27
														74.8026	1241.17	1149.94	1140.69	1183.9	1181.53	1235.54	1166.7	1256.54	1262.73	1262.4	1257.98	1295.73
														74.8636	1243.38	1148.87	1140.62	1181.9	1182.81	1233.69	1168.98	1259.83	1263.27	1262.61	1257.97	1297.03
														74.9249	1246.49	1151.48	1143.51	1184.85	1185.2	1236.2	1169.87	1260.93	1263.85	1266.3	1259.4	1300.6
														74.9859	1242.33	1150.8	1142.39	1184.58	1184.11	1237.11	1168.9	1261.9	1267.69	1266.35	1258.71	1299.76
														75.0472	1242.67	1146.39	1140.08	1183.68	1180.28	1234.68	1168.93	1257.58	1263.2	1264.55	1257.5	1295.2
														75.1084	1243.54	1151.25	1140.39	1185.83	1182.65	1232.89	1169.8	1259.3	1262.33	1265.41	1258.14	1295.25
														75.1696	1245.06	1150.38	1139.39	1183.41	1181	1236.09	1167.94	1261.01	1264.1	1266.69	1261.46	1298.05
														75.2306	1241.71	1150.45	1139.3	1184.07	1180.35	1232.9	1167.12	1257.37	1262.07	1262.32	1256.53	1296.65
														75.2919	1242.18	1147.06	1140.55	1182.5	1184.38	1232.21	1167.29	1257.8	1265.25	1264.83	1255.61	1296.58
														75.353	1242.21	1151.18	1139.4	1181.78	1184.97	1231.64	1167.25	1257.65	1264.64	1264.43	1254.56	1297.8
														75.4141	1242.79	1149.82	1140.77	1183.37	1183.19	1233.53	1167.05	1260.66	1264.61	1265.73	1259.4	1299.76
														75.4753	1241.72	1149.8	1140.25	1184.06	1182.32	1233.81	1169.48	1261.07	1262.83	1265.02	1260.56	1300.56
														75.5365	1243.15	1151.03	1137.26	1183.89	1181.54	1237.2	1168.14	1260.19	1263.31	1264.8	1258.53	1298.07
														75.5976	1245.15	1153.54	1141.34	1184.62	1184.07	1237.58	1170.17	1262.27	1267.96	1268.71	1261.24	1298.34
														75.6588	1240.89	1146.51	1139.86	1182.18	1181.91	1232.35	1167.9	1259.69	1262.36	1260.89	1255.9	1296.48
														75.72	1245.13	1149.71	1137.57	1179.82	1179.88	1233.06	1167.82	1258.4	1261.14	1261.11	1255.36	1294.94
														75.7811	1240.5	1147.59	1139.84	1180.77	1177.99	1234.96	1168.34	1256.08	1263.63	1263.82	1254.62	1295.31
														75.8422	1245.17	1150.69	1140.58	1185.64	1184.8	1233.47	1170.61	1259.29	1264.21	1262.42	1258.03	1297.74
														75.9035	1239.71	1145.47	1137.45	1181.16	1178.87	1228.79	1166.08	1254.73	1260.67	1260.94	1254.75	1295.81
														75.9647	1238.73	1145.77	1137.04	1180.67	1181.73	1233.32	1166.34	1255.53	1263.55	1263.77	1255.01	1292.04
														76.0258	1245.14	1152.54	1142.39	1183.04	1185.11	1234.25	1170.73	1260.76	1265.72	1267.8	1258.02	1299.97
														76.0871	1247.18	1155.11	1144.52	1188.63	1186.82	1239.74	1171.94	1261.81	1269.6	1269.23	1262.77	1301.19
														76.1482	1241.2	1150.37	1138.3	1181.9	1180.45	1233.18	1167.81	1256.18	1263.02	1264.23	1253.64	1295.92
														76.2093	1239.38	1144.58	1138.75	1179.76	1179.11	1231.06	1164.8	1255.49	1260.36	1262.49	1255.4	1294.75
														76.2704	1238.74	1146.58	1137.23	1176.8	1177.67	1227.95	1165.56	1254.78	1261.21	1261.28	1255.24	1291.83
														76.3316	1238.1	1144.05	1136.28	1178.55	1179.93	1231.53	1165.49	1253.55	1262.69	1259.89	1255.04	1290.73
														76.3927	1242.48	1148.34	1137.34	1180.11	1180.92	1231.49	1167.57	1258.31	1262.76	1261.45	1255.78	1295.6
														76.4539	1244.03	1148.18	1140.6	1184.16	1184.78	1230.5	1170.13	1257.99	1264.32	1265.67	1258.72	1295.98
														76.5151	1242.71	1148.93	1138.75	1183.61	1183.32	1233.36	1170.21	1256.86	1263.55	1263.59	1256.05	1297.86
														76.5763	1239.11	1149.05	1137.97	1182.06	1179.76	1231.75	1168.75	1257.99	1261.77	1263.24	1256.86	1294.62
														76.6375	1241.21	1148.52	1139.1	1180.61	1180.09	1230.11	1166.32	1257.13	1262.6	1260.25	1256.91	1296.92
														76.6986	1239.81	1146.29	1136.91	1180.09	1179.56	1231.63	1166.64	1255.08	1259.23	1259.5	1253.75	1293.57
														76.7597	1235.75	1148.67	1136.22	1180.47	1181.13	1232.18	1164.38	1254.11	1261.79	1262.69	1253.3	1293.43
														76.8209	1239.12	1146.71	1139.7	1182.58	1182.39	1232.24	1165.52	1256.14	1260.5	1260.97	1253.49	1292.62
														76.8821	1241.38	1149.52	1137.3	1183.71	1180.82	1231.9	1168.75	1257.45	1261.26	1264.46	1256.3	1293.08
														76.9432	1236.94	1143.8	1135.86	1178.58	1175.55	1229.89	1163.51	1250.62	1257.92	1256.36	1254.19	1293.21
														77.0045	1238.91	1141.76	1136.26	1178.21	1179.43	1230.69	1164.22	1255.87	1258.45	1259.77	1252.16	1291.64
														77.0656	1241.99	1150.49	1137.32	1182.71	1182.2	1233.51	1168.49	1257.2	1264	1261.67	1255.98	1295.59
														77.1267	1245.45	1148.17	1138.17	1181.43	1182.42	1236.32	1168.64	1258.92	1263.8	1262.8	1258.27	1293.94
														77.1879	1242.04	1146.13	1139.09	1180.54	1181.55	1234.89	1167.65	1258	1261.13	1261.61	1257.85	1297
														77.2491	1243.04	1151.65	1139.45	1181.53	1182.2	1233.43	1167.59	1257.87	1264.78	1262.41	1256.44	1296.58
														77.3101	1239.26	1148.88	1136.79	1181.2	1181.32	1233.58	1167.85	1256.46	1261.02	1261.39	1254.78	1296.67
														77.3715	1239.75	1146.52	1136	1179.64	1181.59	1230.62	1164.73	1254.25	1260.71	1259.74	1251.53	1293.7
														77.4326	1241.49	1149.16	1138.88	1180.39	1180.28	1228.88	1167.93	1256.23	1262.21	1260.71	1254.39	1293.09
														77.4937	1240.7	1149.19	1136.32	1179.26	1179.79	1231.25	1168.11	1258.16	1260.75	1262.84	1256.79	1294.72
														77.5547	1239.99	1146.58	1139.13	1180.57	1183.35	1232.15	1165.79	1255.46	1261.45	1260.83	1254.33	1296.43
														77.616	1236.37	1144.09	1134.4	1179.06	1176.34	1229	1163.5	1251.51	1257.67	1259.23	1251.21	1291.94
														77.6771	1238.91	1145.79	1136.68	1177.69	1183.31	1228.56	1166.17	1255.89	1261.9	1260.57	1254.82	1292.07
														77.7383	1243.01	1148.23	1140.52	1180.35	1180.42	1232.74	1167.14	1257.87	1266.3	1262.63	1255.94	1294.96
														77.7995	1236.32	1145.21	1135.79	1179.67	1177.53	1229.54	1164.74	1254.82	1258.57	1257.91	1252.77	1292.13
														77.8606	1236.81	1146.71	1136.67	1179.76	1177.82	1229.84	1164.69	1253.34	1259.1	1260.67	1254.23	1292.45
														77.9219	1239.53	1145.97	1134.94	1179.7	1179.87	1229.39	1165.26	1255.52	1258.34	1259.42	1252.24	1293.47
														77.983	1234.41	1143.36	1132.24	1175.62	1176.28	1225.71	1163.69	1250.32	1257.79	1255.96	1249.45	1288.85
														78.0441	1234.94	1144.12	1134.29	1175.24	1176.19	1228.03	1163.49	1252.22	1260.19	1260.16	1248.92	1291.43
														78.1053	1241.51	1147.85	1136.35	1182.41	1181.83	1233.58	1166.41	1256.56	1264.65	1261.41	1253.47	1296.3
														78.1665	1242.01	1147.41	1139.71	1181.27	1181.1	1235.4	1166.94	1255.39	1264.04	1262.94	1255.75	1296.71
														78.2277	1239.88	1148.4	1137.31	1180.4	1181.65	1234.38	1167.99	1256.47	1263.09	1262.91	1253.45	1296.84
														78.2888	1241	1148.12	1139.72	1182.37	1181.31	1231.9	1167.73	1256.54	1263.06	1265.19	1252.94	1295.61
														78.35	1236.67	1144.81	1137.59	1177.71	1178.38	1230.86	1165.31	1252.38	1259.88	1258.27	1252.07	1294.96
														78.4111	1236.2	1143.16	1133.9	1179.6	1178.79	1228.91	1164.38	1254.69	1256.31	1259.41	1250.06	1292.81
														78.4723	1236.73	1147.45	1135.92	1176.99	1179.36	1229.34	1165.69	1254.18	1259.14	1262.5	1251.53	1293.46
														78.5335	1237.82	1146.27	1137.04	1179.27	1180.07	1230.7	1164.35	1255.6	1262.61	1260.75	1252.2	1295.56
														78.5946	1239.6	1145.72	1136.71	1180.99	1179.62	1231.69	1165.3	1255.53	1260.1	1260.9	1252.63	1293.96
														78.6557	1235.95	1146.17	1136.43	1178.23	1176.94	1228.79	1163.76	1252.98	1259.56	1259.16	1250.24	1290.52
														78.717	1234.16	1142.83	1132.49	1176.09	1176.81	1225.43	1163.14	1251.79	1258.46	1259.03	1248.41	1289.05
														78.7782	1236.84	1145.69	1134.12	1179.81	1178.85	1229.3	1163.9	1255.8	1258.56	1256.95	1251.17	1292.69
														78.8393	1237.91	1145.66	1139.47	1178.87	1180.54	1231.28	1165.15	1255.45	1263.06	1259.38	1254.45	1294.83
														78.9005	1237	1144.44	1135.63	1177.23	1177.74	1230.71	1163.7	1257.49	1259.28	1259.58	1251.9	1291.54
														78.9616	1237.99	1144.01	1134.23	1176.78	1179.2	1226.99	1165.71	1253.07	1259.64	1259.13	1252.2	1292.02
														79.0228	1235.45	1142.52	1136.1	1174.77	1174.56	1228.3	1163.84	1252.13	1259.84	1258.37	1253.31	1292.91
														79.0841	1237.54	1145.99	1139.61	1177.79	1178.91	1231.56	1165.1	1257.99	1261.1	1260.11	1255.97	1294.88
														79.1452	1235.43	1144.99	1135.68	1177.69	1179.11	1227.35	1164.09	1254.81	1260.21	1259.18	1251.82	1291.84
														79.2062	1241.57	1148.09	1137.48	1181.6	1181.15	1231.49	1167.45	1257.65	1263.02	1264.35	1252.54	1295.84
														79.2674	1237.56	1147.42	1136.85	1177.42	1178.42	1232.37	1166.1	1255.26	1261.34	1258.69	1252.37	1294.18
														79.3286	1238.94	1144.56	1137.69	1176.79	1178.35	1229.93	1165.52	1254.53	1262.34	1260.22	1251.94	1294.69
														79.3897	1235.26	1143.5	1134.35	1175.73	1179.08	1230.41	1164.61	1255.79	1258.43	1256.38	1253.65	1291.99
														79.451	1233.07	1145	1132.99	1175.33	1175.53	1230.62	1163.43	1249.7	1258.49	1256.28	1246.9	1289.91
														79.5121	1237.35	1144.91	1134.57	1176.78	1176.47	1227.44	1164.64	1253.68	1259.22	1260.27	1249.85	1293.15
														79.5733	1238.99	1146.71	1134.78	1176.99	1178.98	1231.63	1167.3	1255.18	1261.32	1260.42	1252.33	1295.6
														79.6344	1234.82	1143.9	1137.22	1177.17	1178.01	1230.49	1165.8	1253.59	1259.8	1258.72	1252.85	1291.92
														79.6957	1237.65	1148.29	1134.56	1174.93	1177.6	1228.29	1164.16	1253.04	1259.48	1257.72	1248.87	1294
														79.7567	1235.64	1144.66	1137.93	1175.59	1175.58	1232.34	1165.68	1253.73	1258.08	1257.73	1249.26	1292.47
														79.8178	1238.31	1140.71	1131.82	1174.67	1176.41	1229.34	1164.49	1252.64	1258.89	1257.85	1249.79	1290.36
														79.8792	1237.93	1145.16	1136.99	1180.44	1179.29	1232.24	1167.07	1257.26	1260.36	1261.8	1254.03	1294.6
														79.9402	1237.85	1144.77	1136.26	1177.18	1177.37	1228.03	1166.48	1257.27	1259.22	1260.16	1251.49	1294.76
														80.0013	1235.79	1140.53	1133.26	1177.08	1177.87	1227.17	1163.14	1250.72	1260.46	1257.3	1248.15	1290.4
														80.0626	1234.63	1142.91	1132.53	1175.6	1175.4	1229.07	1164.12	1251.5	1257.93	1259.4	1249.84	1290.47
														80.1236	1234.7	1144.62	1134.77	1178.75	1179.47	1230.61	1164.05	1254.84	1257.99	1260.72	1249.48	1291.9
														80.1848	1232.7	1147.29	1136.98	1176.37	1177.1	1230.22	1164.25	1252.96	1259.1	1256.05	1247.45	1292.11
														80.246	1235.81	1144.08	1131.82	1175.68	1178.5	1226.47	1162.67	1249.95	1258.74	1256.76	1247.31	1289.46
														80.3073	1236.68	1141.92	1133.5	1175.46	1175.8	1227.51	1162.83	1251.29	1258.48	1255.83	1248.75	1293.11
														80.3683	1235.35	1144.32	1134.22	1175.81	1179.58	1229.33	1164.81	1252.22	1259.41	1256.02	1247.29	1294.07
														80.4296	1236.26	1148.35	1135.82	1175.44	1178.39	1230.52	1164.62	1250.91	1261.29	1258.77	1248.72	1292.77
														80.4907	1238.66	1147.92	1138.43	1180.24	1179.79	1233.55	1168.97	1256.46	1263.32	1262.48	1250.97	1296.29
														80.5519	1236.78	1145.22	1137.35	1177.29	1180.04	1230.05	1166.29	1254.91	1259.17	1259.37	1251.78	1294.2
														80.613	1237.91	1149.91	1137.74	1181.1	1180.56	1232.91	1167.74	1258.91	1263.17	1260.86	1255	1296.15
														80.6741	1236.2	1144.99	1135.97	1175.01	1180.97	1229.41	1165.54	1253.12	1260.63	1259.66	1248.61	1291.98
														80.7353	1234.08	1141.79	1133.95	1174.76	1176.62	1228.88	1165.53	1250.76	1258.94	1258.82	1247.15	1294.86
														80.7966	1231.75	1141.44	1130.79	1171.72	1175.63	1227.9	1159.94	1252.45	1256.98	1256.71	1248.47	1288.55
														80.8576	1230.44	1141.58	1128.4	1173.18	1174.15	1225.34	1161.47	1248.4	1255.17	1251.45	1245.09	1289.07
														80.9187	1232.49	1141.65	1133.71	1177.19	1175.37	1228.68	1161.17	1251.73	1257.92	1254.37	1248.92	1290.41
														80.9801	1238.19	1146.3	1136.31	1177.54	1179.48	1231.62	1165.53	1258.08	1263.23	1259.92	1250.53	1294.51
														81.0411	1239.91	1146.32	1137.93	1178.57	1184.48	1231.79	1165.43	1255.44	1263.62	1262.68	1252.6	1296.65
														81.1024	1234.02	1145.75	1135.75	1178.16	1176.65	1230.73	1166.05	1255.25	1259.18	1261.26	1253.07	1294.38
														81.1635	1239.54	1146.24	1134.92	1178.57	1177.89	1231.78	1166.35	1255.41	1263.95	1259.34	1247.96	1295.05
														81.2246	1235.69	1144.92	1132.76	1175.94	1175.53	1226.97	1165.05	1252.46	1260.81	1258.07	1248.51	1291.99
														81.2858	1236.71	1143.1	1132.34	1173.87	1174.68	1227.48	1162.48	1248.4	1258.55	1257.44	1248.52	1287.39
														81.3469	1237.72	1145.12	1134.85	1179.4	1181.5	1228.86	1166.01	1253.56	1260.57	1257.83	1249.8	1293.31
														81.4082	1241.4	1146.93	1136.53	1178.36	1179.56	1233.36	1168.19	1257.06	1259.9	1260.62	1252.4	1296.21
														81.4693	1237.53	1144.7	1136.24	1175.37	1176.35	1228.33	1165.24	1250.64	1259.41	1258.3	1249.54	1291.15
														81.5306	1234.25	1142.65	1134.75	1175.77	1173.76	1230.75	1163.83	1254.68	1257.85	1255.58	1247.42	1289.44
														81.5916	1235.28	1145.52	1135.31	1176.48	1178.97	1230.14	1166.07	1255.31	1258.16	1259.16	1248.24	1293.59
														81.6528	1233.88	1143.92	1135.99	1174.87	1178.05	1229.48	1166.12	1252.46	1259.68	1256.98	1247.84	1294.03
														81.7141	1234.59	1145.13	1135.78	1173.44	1176.78	1229.23	1165.48	1253.51	1257.92	1258.46	1247.22	1291.24
														81.7751	1241.59	1147.13	1138.13	1176.08	1180.72	1232.08	1166.51	1256.66	1263.09	1262.02	1249.37	1293.93
														81.8362	1235.69	1142.45	1136.17	1175.76	1180.16	1231.57	1168.36	1256.87	1259.48	1259.96	1250.7	1294.74
														81.8974	1234.67	1141.3	1134.78	1174.96	1176.72	1228.92	1165.41	1252.46	1258.05	1256.18	1246.83	1293.42
														81.9587	1235.54	1144.29	1134.85	1179.02	1178.8	1230.8	1166.12	1255.94	1262.02	1258.35	1246.41	1290.78
														82.0198	1232.43	1140.57	1133.99	1172.83	1176.05	1226.9	1162.96	1250.64	1258.38	1255.48	1245.16	1290
														82.0811	1231.41	1142.71	1130.59	1169.64	1172.21	1225.42	1161.03	1246.73	1256.57	1251.28	1241.78	1288.54
														82.1422	1235.2	1144.76	1134.22	1175.26	1174.47	1228.79	1165.17	1250.75	1259.12	1257.38	1245.76	1292.37
														82.2032	1233.31	1144.15	1133.48	1175.67	1174.67	1228.33	1163.73	1251.13	1257.38	1258.52	1247.77	1291.86
														82.2644	1235.84	1143.5	1133.15	1173.7	1176.75	1229.02	1165.25	1254.21	1259.92	1257.29	1245.1	1292.09
														82.3256	1234.15	1143.03	1131.02	1172.23	1175.82	1227.76	1164.02	1252.31	1257.49	1254.11	1246.1	1290.71
														82.3866	1235.74	1142.78	1135.03	1172.18	1175.28	1230.26	1163.83	1254.53	1257.29	1257.82	1244.6	1292.66
														82.4478	1232.91	1143.31	1133.88	1174.6	1176.2	1228.57	1163.38	1253.93	1257.33	1255.44	1240.59	1291.14
														82.509	1234.04	1144.23	1134.78	1175.36	1179.03	1230.08	1163.96	1253.46	1260.53	1259.53	1247.87	1293.58
														82.5702	1234.85	1146.2	1137.68	1173.42	1177.25	1229.2	1164.71	1252.25	1256.64	1258.25	1246.8	1292.18
														82.6313	1232.7	1141.9	1134.36	1171.94	1176.11	1226.38	1164.55	1252.31	1258.8	1253.09	1243.68	1290.89
														82.6926	1232.64	1137.86	1131.23	1169.88	1170.67	1220.28	1158.67	1245.59	1254.71	1255.54	1240.07	1287
														82.7537	1232	1141.35	1131.31	1172.98	1175.27	1225.64	1161.43	1251.82	1256.1	1255.33	1241.12	1288.24
														82.8149	1235.13	1141.59	1132.08	1175.46	1178.27	1226.8	1162.78	1252.04	1256.96	1256.79	1246.59	1292.43
														82.876	1234.93	1141.92	1133.27	1172.92	1174.81	1226.38	1162.58	1250.77	1256.69	1255.65	1246.3	1291.27
														82.9371	1233.2	1141.84	1134.11	1173.58	1175.53	1228.21	1161.26	1251.23	1257.14	1252.67	1243.09	1288.37
														82.9983	1233.3	1143.12	1132.64	1170.79	1177.51	1226.81	1164.86	1252.87	1257.1	1255.39	1245.89	1292.8
														83.0596	1235.56	1144.32	1135.91	1175.73	1175.52	1230.49	1163.98	1254.23	1259.13	1256.16	1247.46	1293.9
														83.1207	1236.75	1145.01	1133.42	1176.77	1180.02	1230.41	1164.77	1253.2	1257.64	1258.08	1248.05	1293.2
														83.1819	1229.6	1141.5	1130.43	1172.08	1171.57	1223.11	1163.27	1250.39	1257.28	1254.99	1243.07	1285.58
														83.2431	1226.81	1137.45	1130.13	1167.44	1170.06	1219.87	1157.78	1245.59	1250.95	1249.1	1238.21	1285.91
														83.3042	1231.39	1139.07	1130.72	1169.08	1171.93	1223.26	1160	1250.86	1252.36	1253.38	1242.13	1289.98
														83.3653	1234.29	1141.7	1135.35	1176.13	1177.34	1229.68	1165.25	1253.72	1260.12	1259.29	1247.95	1291.51
														83.4266	1233.36	1142.86	1135.59	1176.8	1176.67	1228.62	1164.16	1253.69	1258.74	1257.1	1243.9	1289.84
														83.4877	1236.79	1146.6	1137.82	1177.92	1179.14	1229.62	1166.76	1257.73	1262.07	1258.34	1250.28	1293.29
														83.5488	1234.15	1143.28	1135.88	1169.78	1176.37	1226.36	1164.22	1251.98	1259.89	1255.7	1243.51	1291.7
														83.6101	1229.26	1135.35	1130.41	1170.38	1170.66	1223.52	1160.63	1246.05	1252.78	1250.84	1241.6	1288.53
														83.6711	1235.41	1142.43	1131.5	1173.61	1179.27	1226.06	1165.78	1252.6	1258.82	1257.38	1247.47	1293.09
														83.7324	1236.88	1147.38	1138.03	1175.68	1177.99	1230.07	1167.91	1257.84	1262.15	1260.18	1249.36	1294.51
														83.7937	1233.29	1143.66	1132.8	1174.26	1176.21	1229.66	1163.28	1252.71	1257.89	1256.7	1245.36	1293.62
														83.8547	1232.16	1145.7	1134.5	1174.42	1175.71	1228.23	1163.68	1253.77	1257.91	1257	1245.41	1291.81
														83.9158	1230.78	1139.64	1128.52	1170.06	1175.02	1223.63	1161.46	1248.57	1255.55	1253.38	1241.75	1287.45
														83.9769	1231.63	1138.1	1129.19	1169.43	1171.33	1221.6	1159.29	1247.33	1253.46	1248.78	1240.31	1286.6
														84.0382	1232.67	1143.39	1133.23	1174.25	1175.9	1228.14	1163.88	1252.66	1260.3	1255.6	1246.27	1291.56
														84.0992	1233.85	1140.82	1133.6	1171.94	1176.94	1228.66	1163.34	1252.07	1257.93	1252.63	1242.71	1289.33
														84.1603	1232.28	1140.58	1130.05	1173.08	1172.59	1225.31	1161.74	1250.45	1258.15	1252.59	1242.51	1290.35
														84.2216	1228.92	1138.98	1130.55	1172.17	1172.39	1227.72	1162.85	1252.16	1255.72	1252.54	1240.45	1289.64
														84.2829	1229.52	1138.59	1126.85	1170.73	1173.51	1222.69	1160.62	1246.49	1253.51	1252.46	1237.88	1286.54
														84.3439	1226.68	1136.43	1130.59	1170.93	1169.32	1224.33	1158.05	1248.72	1252.47	1250.98	1239.7	1284.81
														84.4052	1227.59	1137.27	1128.93	1169.12	1172.43	1222.68	1159.37	1248.83	1253.45	1252.17	1239.74	1284.64
														84.4664	1233.77	1142.79	1131.14	1174.04	1172.9	1226.63	1162.16	1249.1	1258.6	1256.35	1243.51	1288.69
														84.5274	1231.4	1136.83	1127.57	1170.46	1173.28	1225.36	1162.3	1250.06	1256.67	1252.72	1239.9	1287.66
														84.5887	1230.48	1141.18	1133.01	1172.49	1175.51	1225.74	1162.99	1251.32	1260.01	1255.21	1241.04	1291.44
														84.6498	1227.02	1137.79	1130.73	1168.55	1175.58	1223.8	1160.05	1244.45	1255.79	1249.76	1241.87	1287.82
														84.7109	1234.27	1143.56	1134.2	1172.87	1175.59	1228.6	1165.76	1254.18	1257.93	1256.3	1244.06	1292.95
														84.7722	1235.76	1142.11	1133.48	1172.66	1176.07	1228.97	1165.99	1255	1258.34	1257.98	1247.6	1294.69
														84.8332	1232.03	1142.29	1133.45	1177.58	1179.08	1228.71	1165.84	1254.02	1259.8	1256.98	1243.4	1292.82
														84.8944	1230.13	1140.34	1132.54	1172.59	1172.4	1222.68	1162.25	1249.68	1257.26	1252.46	1241.38	1287.56
														84.9555	1233.66	1139.46	1131.11	1167.95	1174.69	1223.01	1161.28	1248.06	1255.29	1252.98	1243.31	1287.75
														85.0167	1230.06	1138.34	1130.77	1169.24	1173.6	1222.53	1161.47	1250.82	1254.76	1253.6	1243.54	1287.42
														85.0778	1229.29	1139.76	1128.83	1168.61	1172.05	1224.66	1159.76	1250.47	1252.32	1253.02	1240.33	1288.06
														85.1391	1226.21	1136.21	1130.33	1167.69	1173.24	1219.2	1160.93	1246.64	1250.91	1250.89	1237.55	1286.13
														85.2002	1229.39	1137.45	1128.68	1168.02	1170.89	1223.03	1160.24	1250.15	1250.3	1251.16	1238.96	1285.67
														85.2613	1228.19	1137.24	1130.72	1169.32	1169.53	1223.22	1159.65	1248.04	1255.16	1251.5	1242.36	1286.17
														85.3226	1227.45	1137.83	1129.55	1169.29	1170.99	1224.61	1159.24	1246.59	1254.95	1251.05	1240.81	1286.62
														85.3837	1225.98	1137.23	1127.9	1169.19	1169.91	1224.39	1158.85	1248.14	1254.42	1251.79	1238.53	1284.97
														85.4449	1230.9	1141.29	1132.88	1173	1176.74	1226.75	1162.78	1252.62	1255.94	1254.58	1247	1291.21
														85.5061	1230.41	1139.34	1132.21	1171.14	1173.41	1225.71	1161.77	1253.18	1255.93	1254.79	1241.86	1290.21
														85.5673	1228.53	1139.65	1126.89	1170.85	1173.8	1225.03	1160.87	1245.64	1253.02	1250.35	1240.77	1286.96
														85.6283	1226.06	1134.82	1127.94	1169.2	1168.76	1224.28	1157.87	1245.9	1254.89	1252.56	1235.8	1284.84
														85.6896	1228.7	1139.11	1127.85	1169.73	1172.6	1222.38	1160.07	1245.98	1251.83	1249.47	1237.52	1284.46
														85.7507	1230.75	1140.52	1132.36	1171.69	1173.39	1227.28	1163.39	1248.83	1258.05	1252.46	1243.8	1291.88
														85.8119	1233.16	1141.76	1134.52	1174.23	1178.3	1227.65	1166.39	1253.32	1258.55	1256.72	1245.15	1292.3
														85.8733	1233.42	1139.43	1132.18	1171.88	1174.4	1227.52	1161.83	1250.15	1258.73	1255.43	1245.1	1292.44
														85.9343	1232.4	1137.85	1127.59	1171.53	1174.08	1222.82	1163.14	1249.74	1256.61	1250.45	1241.99	1288.95
														85.9954	1229.69	1138.69	1130.23	1170.32	1173.75	1226.55	1161.31	1247.5	1255.8	1253.68	1242.53	1288.68
														86.0564	1230.3	1140.65	1130.82	1174.87	1175.83	1226.32	1163.99	1249.36	1260.34	1254.35	1242.94	1289.1
														86.1178	1229.33	1137.31	1127.83	1169.27	1172.23	1223.54	1160.37	1247.05	1255.45	1251	1244.37	1287.92
														86.1788	1229.49	1139.31	1130.33	1171.44	1173.21	1225.44	1162.88	1251.86	1256.18	1252.35	1242.43	1289.15
														86.2399	1230.43	1138.38	1129.78	1171.36	1175.49	1223.92	1161.53	1249.47	1257.93	1254.59	1242.38	1290.63
														86.3011	1236.04	1142.54	1131.43	1174.21	1175.32	1226.94	1162.73	1252.7	1257.3	1253.76	1245.7	1290.55
														86.3622	1228.4	1138.77	1130.79	1170.16	1174.47	1227.62	1163	1250.87	1257.36	1255.68	1242.05	1288.64
														86.4234	1229.99	1141.86	1132.96	1173.38	1175.13	1226.74	1163.56	1248.73	1258.05	1255.44	1244.37	1293.33
														86.4846	1227.91	1137.44	1129.6	1169.82	1172.96	1221.69	1159.77	1249.22	1252.9	1249.77	1239.73	1286.02
														86.5458	1226.86	1135.88	1128.7	1170.57	1171.61	1224.33	1160.88	1250.2	1253.69	1255.59	1241.07	1290.75
														86.6069	1230.13	1138.39	1131.16	1172.54	1174.87	1225.58	1161.91	1249.21	1256.9	1254.41	1242.67	1289.16
														86.6682	1229.54	1142.58	1130.37	1173.41	1177.55	1226.74	1165.85	1254.1	1259.48	1256.23	1244.3	1290
														86.7294	1225.97	1136.55	1126.95	1168.77	1170.3	1221.91	1159.55	1249.53	1251.14	1248.97	1240.49	1285.65
														86.7904	1226.68	1137.38	1129.05	1169.38	1171.86	1220.16	1159.2	1249.22	1255.38	1248.29	1238.48	1288.11
														86.8517	1229.53	1138.63	1130.9	1168.79	1173.82	1223.84	1158.63	1248.63	1254.79	1250.21	1241.09	1286.76
														86.9128	1229.33	1138.96	1127	1168.92	1170.78	1225.12	1162.85	1249.16	1255.27	1251.04	1239.73	1287.51
														86.9739	1230.66	1140.77	1132.45	1171.55	1174.73	1228.1	1161.88	1251.74	1256	1253.68	1245.41	1288.41
														87.0352	1229.16	1141.33	1127.88	1170.67	1172.05	1225.71	1161.7	1246.52	1256.58	1252.77	1240.97	1287.66
														87.0963	1227.84	1137.26	1129.26	1169.67	1173.29	1222.24	1159.91	1248.42	1257.54	1251.47	1243.34	1288.31
														87.1574	1228.15	1137.8	1130.1	1170.04	1169.96	1224.06	1160.87	1246.94	1255.21	1252.07	1242.73	1287.96
														87.2187	1227.2	1138.92	1130.78	1168.05	1171.15	1224.41	1163.9	1249.61	1256.61	1253.77	1241.02	1289.3
														87.2799	1233.1	1139.69	1133.93	1171.84	1175.17	1227.61	1164.12	1250.84	1259.43	1254.43	1244.54	1289.02
														87.3409	1230.2	1138.11	1130.48	1171.58	1173.85	1224.7	1161.6	1247.79	1257.08	1251.68	1241.95	1288.4
														87.4023	1231.33	1140.21	1132.34	1170.61	1172.7	1227.96	1164.14	1248.43	1257.6	1254.1	1243.18	1289.57
														87.4632	1229.05	1139.41	1128.92	1170.67	1171.35	1225.93	1160.99	1247.57	1255.69	1252.71	1243.65	1288.14
														87.5243	1229.67	1140.6	1126.06	1169.71	1171.74	1224.36	1160.47	1248.07	1255.21	1250.68	1242.17	1287.26
														87.5856	1231.48	1135.17	1128.07	1170.33	1173.26	1225.89	1161.96	1250.43	1253.88	1252.07	1243.69	1287.72
														87.6467	1230.74	1139.62	1133.41	1169.63	1173.84	1224.24	1163.75	1250.47	1258.39	1255.36	1245.55	1289.84
														87.7078	1227.07	1137.4	1129.58	1169.49	1171.32	1221.21	1160.89	1246.9	1253.29	1248.12	1241.9	1289.81
														87.7692	1226.06	1135.5	1130.04	1168.5	1171.97	1226.06	1161.31	1248.29	1253.37	1251.38	1242.17	1288.96
														87.8302	1231.79	1139.7	1128.47	1170.55	1175.39	1227.21	1163.1	1251.29	1257.64	1256.68	1246.35	1290.73
														87.8913	1225.22	1137.72	1130.45	1169.53	1173.77	1223.32	1162.68	1250.76	1256.2	1250.7	1243.7	1286.01
														87.9527	1227.45	1136.84	1129.44	1169.77	1172.69	1222.97	1161.01	1249.49	1259.1	1252.33	1241.89	1287.62
														88.0138	1224.38	1137.22	1128.26	1169.09	1171.86	1222.46	1162.93	1249.45	1254.32	1250.39	1240.47	1288.01
														88.0747	1224.57	1136.35	1130.17	1169.5	1170.97	1224.89	1160.59	1247.72	1254.61	1250.41	1239.41	1285.63
														88.136	1229.2	1136.69	1130.08	1171.65	1173.29	1222.98	1163.99	1249.35	1256.59	1251.96	1244.54	1287.86
														88.1973	1228.41	1140.16	1129.98	1170.91	1171.78	1223.52	1161.76	1250.31	1255.7	1254.67	1242.99	1286.57
														88.2583	1228.48	1135.57	1126.53	1168.72	1171.82	1221.4	1158.52	1244.64	1252.25	1248.63	1241.19	1287.71
														88.3195	1228.71	1136.39	1127.53	1171.52	1172.13	1222.31	1160.79	1249.25	1255.76	1252.69	1241.62	1288.78
														88.3808	1229.71	1140.68	1133.8	1172.74	1175.2	1228.83	1162.79	1251.9	1256.43	1253.8	1245.44	1289.68
														88.4419	1225.89	1137.6	1127.22	1166.26	1172.66	1220.32	1159.3	1247.32	1253.49	1250.51	1240.51	1287.78
														88.503	1226.5	1135.61	1129.74	1167.13	1172.24	1223.45	1160.99	1245.51	1253.2	1250.91	1242.48	1285.5
														88.5643	1231.16	1139.14	1129.85	1172.43	1173.08	1226.12	1162.98	1251.75	1258.28	1254.2	1244.07	1287.4
														88.6254	1233.43	1141.78	1136.21	1174.78	1178.03	1231.32	1168.26	1253.02	1259.33	1255.19	1247.07	1295.46
														88.6865	1228.58	1136.71	1128.42	1167.11	1173.42	1220.04	1158.96	1244.69	1252.34	1248.77	1240.83	1283.96
														88.7477	1222.79	1134.92	1124.17	1167.26	1168.09	1220.88	1157.09	1244.21	1249.46	1248.16	1238.21	1285.9
														88.8089	1230.64	1140.46	1130.72	1170.8	1174.31	1224.4	1161.94	1246.73	1255.52	1253.25	1243.08	1288.82
														88.87	1228.24	1138.63	1130.07	1171.29	1170.99	1225.99	1161.62	1248.02	1256.74	1253.95	1240.65	1287.06
														88.9312	1229.05	1138.08	1130.48	1170.45	1172.2	1224.17	1160.57	1247.46	1254.92	1248.58	1243.78	1288.31
														88.9924	1228.78	1137.06	1132.4	1170.88	1170.92	1224.28	1161.4	1252.15	1257.63	1252.45	1243.77	1288.68
														89.0535	1224.94	1136.07	1126.52	1169.17	1172.65	1223.56	1160.44	1246.53	1254.65	1251.85	1241.49	1288.27
														89.1147	1227.82	1136.43	1127.3	1168.57	1170.57	1221.23	1162.79	1248.74	1254.9	1249.54	1242.76	1288.3
														89.1758	1227.92	1137.2	1129.39	1170.3	1171.65	1224.44	1160.41	1247.65	1253.03	1250.12	1243.29	1287.5
														89.237	1230.85	1139.11	1133.67	1173.24	1175.74	1229.37	1163.95	1249.85	1259.63	1256.67	1245.47	1290.68
														89.2982	1223.48	1136.37	1129.4	1166.97	1172.15	1221.09	1159.3	1248.51	1254.57	1251.75	1241.32	1286.24
														89.3593	1225.95	1136.76	1128.16	1168.9	1171.53	1221.73	1158	1247.59	1256.35	1251.56	1243.29	1285.5
														89.4205	1224.07	1136.03	1124.8	1167	1168.81	1221.21	1161	1246.79	1253.76	1250.96	1240.16	1283.22
														89.4817	1227.52	1136.9	1127.24	1170.37	1170.53	1222.27	1159.31	1248.41	1255.26	1250.78	1239.19	1287.68
														89.5428	1225.77	1136.18	1128.92	1169	1170.54	1223.76	1160.29	1248.36	1255.66	1251.43	1239.85	1286.18
														89.604	1226.35	1136.37	1127.84	1166.96	1171.2	1223.36	1163.13	1249.7	1253.29	1250.85	1241.63	1288.46
														89.6652	1226.4	1136.37	1129.73	1168.05	1174.95	1221.45	1160.46	1248.4	1255.94	1248.59	1243.5	1286.25
														89.7263	1226.89	1135.4	1126.84	1166.61	1170.35	1220.47	1157.39	1247.68	1250.37	1249.83	1241.73	1286.14
														89.7874	1222.73	1132.17	1125.71	1164.12	1165.27	1217.49	1155.38	1242.85	1248.82	1247.8	1235.08	1280.53
														89.8487	1225.11	1135.09	1122.66	1164.44	1169.58	1219.01	1156.5	1245.87	1248.96	1246.67	1241.17	1285.5
														89.9098	1226.29	1135.16	1127.45	1168.77	1171.16	1221.84	1160.9	1247.11	1255.28	1250.29	1240.89	1288.16
														89.971	1224.93	1137.09	1127.83	1170.76	1169.78	1222.42	1162.42	1246.73	1254.23	1253.09	1243.66	1289.24
														90.032	1223.07	1133.33	1127.89	1167.51	1168.48	1223.09	1158.54	1244.31	1253.19	1249.03	1240.06	1283.78
														90.0932	1223.89	1137.01	1128.36	1168.19	1170.07	1222.03	1160.97	1247.05	1254.78	1249.93	1240.56	1287.53
														90.1543	1227.67	1135.38	1125.77	1166.46	1170.28	1222.94	1159.52	1245.87	1253.78	1251.95	1240.4	1286.45
														90.2157	1225.05	1135.94	1127.21	1168.65	1170.58	1222.44	1163.84	1248.55	1254.72	1250.17	1240.37	1287.99
														90.2767	1229.04	1135.86	1129.53	1168.76	1171.21	1222.73	1162.13	1250.55	1255.93	1252.71	1240.97	1285.75
														90.3379	1223.75	1136.32	1127.38	1168.25	1168.54	1221.5	1159.29	1247.39	1253	1249.14	1238.51	1284.51
														90.399	1225.62	1137.01	1127.46	1167.22	1169.58	1219.26	1160.44	1246.89	1254.32	1248.25	1241.83	1286.3
														90.4602	1227.24	1135.87	1127.61	1162.49	1166.8	1220.25	1160.03	1245.82	1251.53	1249.84	1238.75	1285.44
														90.5213	1225.25	1135.68	1126.07	1164.7	1165.73	1221.03	1157.68	1246.01	1250.21	1250.67	1238.64	1284.21
														90.5824	1226.59	1137.29	1128.61	1169.79	1170.22	1225.01	1159.29	1245.8	1254.64	1248.81	1240.78	1286.88
														90.6436	1232.06	1138.21	1129.09	1168.78	1171.46	1224.76	1162.97	1250.86	1256.86	1253.33	1244.59	1288.74
														90.7048	1224.31	1133.55	1129.1	1168.91	1169.23	1223.04	1158.27	1246.4	1254.72	1250.43	1238.19	1285.44
														90.7659	1221.94	1134.18	1124.75	1165.43	1166.85	1218.87	1157.15	1245.34	1252.6	1246.44	1236.76	1283.39
														90.8272	1225.2	1135.84	1124.79	1164.54	1167.99	1220.47	1158.24	1245.8	1253.24	1250.25	1239.1	1282.83
														90.8883	1225.67	1133.44	1125.33	1165.44	1169.72	1219.22	1159.21	1245.93	1253.16	1247.3	1241.22	1286.24
														90.9494	1225.71	1137.56	1128.09	1166.13	1170.4	1221	1159.47	1247.13	1252.02	1250.11	1241.96	1286.35
														91.0108	1230.08	1136.52	1127.73	1167.13	1170.62	1223.9	1163.03	1248.18	1253.4	1251.29	1239.25	1288.11
														91.0719	1226.09	1134.69	1124.74	1166.04	1170.1	1220.55	1159.59	1245.77	1252.88	1248.56	1241.75	1285.15
														91.133	1224.13	1135.77	1127.07	1167.35	1171.32	1221.37	1161.41	1248.45	1255.42	1251.38	1242.71	1288.02
														91.1943	1227.58	1139.53	1130.03	1168.68	1172.71	1223.97	1163.89	1249.6	1255.25	1249.18	1241.35	1287.51
														91.2554	1223.78	1134.35	1127.64	1167.69	1170.33	1222.28	1161.1	1248.08	1252.84	1249.92	1241.05	1288.71
														91.3165	1221.94	1132.24	1124.06	1162.89	1167.71	1217.53	1157.74	1241.86	1253.03	1246.81	1238.05	1284.38
														91.3777	1229.37	1139.34	1128	1170.43	1175.01	1224.63	1161.24	1251.09	1255.45	1248.21	1243.52	1289.05
														91.4389	1227.33	1138.06	1127.96	1168.04	1172.33	1225.46	1162.2	1247.8	1256.33	1252.95	1247.51	1290.88
														91.5	1228.3	1139.2	1129.67	1170.04	1169.31	1222.99	1161.61	1247.71	1253.28	1250.35	1242.39	1285.74
														91.5612	1229.33	1138.65	1128.13	1168.52	1172.09	1223.26	1161.4	1248.91	1255.74	1247.58	1240.7	1284.95
														91.6224	1222.03	1132.71	1126.43	1165.52	1167.4	1218.32	1158.17	1245.74	1251.79	1246.8	1240.08	1282.25
														91.6834	1221.38	1129.46	1124.8	1163.28	1165.04	1216.28	1157.31	1242.03	1249.65	1245.99	1240.75	1282.49
														91.7447	1222.05	1130.35	1123.28	1161.85	1164.7	1217.98	1156.19	1241.81	1251.77	1247.36	1237.14	1282.27
														91.8058	1224.7	1135.67	1126.22	1166.81	1165.59	1218.43	1158.73	1244.59	1251.77	1245.82	1239.39	1286.16
														91.867	1227.7	1137.36	1126.54	1167.55	1170.58	1221.58	1163.06	1249.22	1255.88	1250.36	1242.29	1285.62
														91.9282	1226.58	1135.25	1127.53	1165.21	1167.1	1220.65	1158.93	1249.11	1252.05	1247.48	1238.41	1285.52
														91.9894	1223.05	1133.16	1124.44	1164.19	1167.22	1217.76	1157.17	1247.15	1249.11	1247.27	1238.8	1282.32
														92.0505	1222.58	1131.99	1123.19	1162.32	1165.98	1215.52	1157.09	1243.02	1250.7	1247.58	1238.32	1280.03
														92.1117	1225.11	1138.28	1126.9	1168.14	1168.17	1218.53	1160.91	1246.66	1257.14	1248.44	1237.91	1284.32
														92.1729	1223.88	1133.06	1125.86	1164.25	1170.99	1220.67	1158.27	1245.08	1252.26	1247.78	1239.4	1287.19
														92.234	1226.39	1136.12	1131.31	1166.41	1168.93	1221.61	1160.7	1247.42	1254.56	1250.36	1239.61	1286.02
														92.2952	1223.56	1132.64	1126.24	1163.11	1166.94	1217.37	1158.62	1245.81	1251.29	1246.38	1238.44	1283.1
														92.3564	1224.64	1134.67	1126.29	1164.24	1168.85	1220.48	1158.69	1244.53	1252.16	1248.17	1238.15	1285.45
														92.4175	1228.89	1135.25	1126.12	1167.09	1168.31	1220.88	1159.66	1245.71	1254.2	1249.23	1241.07	1287.13
														92.4786	1228.83	1135.74	1127.99	1168.65	1170.49	1226.23	1160.63	1247.77	1256.93	1250.2	1240.09	1286.02
														92.5399	1225.21	1134.53	1126.92	1164.43	1168.55	1219.67	1159.52	1246.57	1253.7	1250.95	1241.9	1286.45
														92.601	1219.54	1127.65	1125.13	1162.2	1165.54	1215.22	1157.33	1243.24	1251.46	1243.05	1235.71	1280.94
														92.6621	1219.02	1131.14	1124.4	1161.4	1165.18	1217.01	1156.51	1242.98	1250.33	1247.28	1239.75	1281.82
														92.7233	1224.7	1132.49	1127.05	1165.88	1167.29	1221.53	1158.2	1246.99	1251.86	1250.17	1242.41	1285.59
														92.7844	1223.39	1135.21	1126.7	1165.84	1169.54	1220.1	1160.72	1247.18	1256.09	1249.72	1241.5	1283.46
														92.8455	1226.81	1138.55	1131.07	1169.27	1170.89	1222.99	1162.19	1249.36	1257.27	1252.29	1242.29	1288.48
														92.9068	1224.45	1136.9	1127.16	1165.73	1170.37	1219.1	1160.57	1246.8	1256.77	1250.63	1243.42	1286.41
														92.968	1225.39	1137.72	1127.51	1166.21	1169.48	1220.21	1162.42	1249.62	1253.21	1249.28	1242.76	1286.11
														93.029	1223.14	1131.68	1125.39	1165.2	1169.83	1219.24	1157.3	1246.99	1249.83	1248.86	1235.93	1284.23
														93.0904	1225.83	1137.27	1130.58	1164.89	1168.66	1219.02	1160.21	1250.36	1252.69	1249	1243.19	1285.35
														93.1514	1227	1134.91	1127.16	1165.64	1170.39	1219.22	1161.69	1248.17	1256.31	1250.39	1242.61	1287.27
														93.2124	1222.43	1135.21	1124.52	1167.41	1168.44	1219	1160.06	1246.74	1252.33	1249.55	1242.65	1284.64
														93.2737	1222.74	1133.75	1124.12	1164.34	1166.91	1217.9	1157.07	1244.95	1252.23	1246.51	1236.28	1281.47
														93.3349	1224.15	1133.06	1125.55	1162.62	1165.43	1217.22	1160.01	1241.07	1250.43	1246.51	1236.12	1281.87
														93.396	1219.64	1131.02	1121.63	1159.45	1164.36	1216.57	1156.22	1240.92	1246.96	1244.06	1234.65	1279.69
														93.4573	1224.14	1134.17	1128.28	1167.17	1168.8	1218.52	1160.64	1247.07	1254.18	1246.82	1240.43	1285.2
														93.5184	1225.71	1137.01	1128.64	1166.8	1169.64	1221.08	1162.91	1248.01	1253.81	1252.4	1243.69	1289.14
														93.5795	1225.18	1135.33	1126.53	1165.91	1168.4	1221.51	1162.01	1246.37	1252.48	1249.7	1243.93	1286.09
														93.6408	1223.15	1137.2	1125.38	1164.67	1167.87	1221.07	1160.31	1243.09	1250.4	1250.07	1241.39	1284.05
														93.7019	1227.69	1136.89	1128.65	1168.32	1170.17	1221.02	1161.44	1246.69	1255.74	1249.21	1240.64	1288.74
														93.7629	1225.16	1134.37	1130.13	1168.32	1171.11	1219.48	1159.48	1247.52	1256.14	1249.83	1241.88	1289.95
														93.8242	1224.97	1136.82	1128.24	1168.04	1168.95	1219.32	1161.48	1250.54	1255.96	1250.28	1239.11	1287.13
														93.8853	1222.93	1135.98	1125.19	1165.52	1166.04	1217.45	1159.29	1245.34	1251.4	1245.02	1238.27	1284.14
														93.9464	1221.88	1133.9	1124	1165.09	1166.8	1215.08	1156.3	1243.1	1250.57	1245.93	1237.96	1282.86
														94.0077	1219.8	1130.75	1125.57	1163.98	1164.96	1215.19	1159.31	1244.41	1252.9	1245.64	1236.99	1282.29
														94.0688	1226.82	1137.05	1128.59	1166.46	1170.05	1221.58	1161.34	1247.57	1254.1	1250.6	1240.56	1286.44
														94.1299	1228.15	1137.51	1129.88	1168.46	1172.3	1222.98	1161.83	1249.3	1258.17	1249.91	1242.1	1288.56
														94.1911	1229.12	1136.62	1127.53	1166.38	1169.44	1221.06	1159.54	1246.09	1255.18	1249.45	1240.74	1287.32
														94.2523	1223.77	1133.58	1121.51	1162.06	1163.34	1215.41	1157.59	1242.14	1249.91	1245.71	1238.06	1280.55
														94.3133	1225.95	1135.36	1129.34	1166.52	1167.08	1221.66	1160.65	1245.14	1253	1249.17	1242.23	1283.84
														94.3746	1228.56	1133.01	1127.76	1166.57	1170.97	1221.6	1160.44	1246.81	1255.29	1248.54	1244.7	1284.6
														94.4357	1224.2	1132.47	1124.34	1164.15	1165.67	1219.05	1158.56	1245.7	1253.99	1248	1239.96	1286.19
														94.4968	1224.5	1133.6	1125.49	1165.48	1167.52	1219.48	1160.03	1243.19	1252.29	1247.97	1242.1	1288.58
														94.558	1221.52	1133.1	1126.51	1166.22	1166.67	1218.02	1159.56	1245.87	1251.55	1248.71	1243.33	1284.91
														94.6193	1222.46	1129.34	1123.91	1161.98	1164.02	1213.16	1157.81	1243.92	1252	1246.72	1239.41	1280.44
														94.6803	1216.37	1130.62	1121.61	1161.9	1163.48	1216.65	1155.29	1242.75	1247.94	1244.99	1235.96	1278.23
														94.7416	1223.9	1134.35	1126.02	1163.86	1166.16	1218.68	1159.12	1247.19	1254.24	1248.46	1240.6	1282.35
														94.8028	1225.72	1133.93	1127.08	1166.69	1167.5	1217.36	1159.45	1245.57	1253.1	1249.35	1238.37	1283.98
														94.8639	1221.83	1134.21	1126.08	1165.07	1166.02	1219.79	1157.39	1242.92	1252.22	1246.39	1239.86	1283.19
														94.9251	1223.13	1130.89	1121.16	1162.6	1167.05	1218.54	1157.62	1244.35	1252.44	1243.53	1239.02	1282.96
														94.9863	1224.09	1134.95	1127.77	1168.43	1168.89	1217.6	1159.47	1247.2	1256.28	1250.01	1238.46	1287.33
														95.0474	1223.65	1132.05	1124.83	1162.53	1161.03	1220.11	1158.12	1245.33	1251.86	1248.49	1237.03	1284.25
														95.1086	1218.77	1131.7	1125.25	1159.86	1163.41	1217.85	1156.85	1242.96	1255.15	1247.7	1238.24	1283.36
														95.1699	1224.6	1132.23	1125.8	1161.97	1167.02	1218.2	1158.22	1242.46	1251.93	1244.44	1238.61	1282.64
														95.231	1218.65	1132.18	1125.23	1161.62	1164.91	1215.76	1157.02	1244	1249.73	1244.02	1235.62	1282.64
														95.2921	1219.52	1131.82	1125.63	1162.36	1166.61	1216.39	1159.41	1246.57	1250.51	1246.33	1239.98	1282.73
														95.3534	1220.64	1130.82	1124.14	1163.75	1167.61	1218.66	1157.66	1243.21	1251.88	1248.04	1240.37	1284.2
														95.4145	1222.02	1132.91	1125.67	1163.91	1165.85	1217.24	1158.56	1243.91	1251.78	1247.85	1240.84	1283.45
														95.4755	1220.38	1132.59	1123.71	1164.53	1163.67	1217.41	1160.53	1245.39	1250.3	1248.17	1240.71	1284.93
														95.5368	1219.39	1132.79	1126.51	1164.48	1166.63	1221.67	1159.46	1248.86	1251.79	1246.55	1239.24	1282
														95.5979	1223.67	1131.76	1121.69	1162.42	1163.47	1217.11	1156.41	1244.31	1251.43	1244.98	1239.7	1281.53
														95.659	1221.46	1131.43	1124.21	1161.77	1164.69	1214.97	1158.15	1244.82	1251.93	1248.16	1239.05	1281.21
														95.7204	1221.29	1130.03	1122.96	1162.47	1162.82	1215.41	1157.2	1239.86	1248.03	1247.78	1237.86	1282.1
														95.7814	1221.49	1130.86	1124.79	1163.66	1166.28	1220.36	1158.53	1244.71	1249.86	1247.2	1238.32	1282.68
														95.8426	1220.6	1134.36	1122.9	1165.35	1168.39	1218.81	1158.78	1245.46	1253.01	1245.81	1238.9	1282.69
														95.9038	1216.49	1131.64	1123.23	1161.31	1164.25	1217.98	1157.17	1245.57	1249.4	1244.61	1237.65	1283.18
														95.9649	1226.45	1135.7	1127.69	1166.18	1167.62	1220.72	1160.22	1243.25	1253.74	1249.91	1239.84	1288.74
														96.026	1224.71	1134.85	1129.94	1169.01	1167.6	1223	1161.43	1250.58	1257.39	1250.63	1243.29	1286.04
														96.0873	1221.33	1132.71	1123.08	1162.52	1164.34	1217.87	1155.92	1241.46	1250.75	1246.5	1235.35	1281.76
														96.1484	1219.85	1129.97	1120.85	1160.4	1162.72	1215.45	1155.56	1244.28	1250.62	1240.78	1236.65	1278.21
														96.2095	1222.66	1133.67	1128.74	1164.77	1167.05	1220.52	1160.49	1247.1	1253.23	1247.73	1242.44	1287.61
														96.2708	1224.96	1137.01	1130.13	1168.47	1169.04	1220.21	1163.57	1249.86	1257.5	1252.03	1244.23	1288.6
														96.3319	1222.5	1137.14	1126.09	1167.76	1168.86	1220.98	1162.13	1247.46	1254.21	1251.36	1245.15	1285.2
														96.393	1220.53	1131.56	1125.68	1163	1165.92	1218.38	1157.27	1244.24	1252.76	1245.53	1239.63	1284.24
														96.4543	1219.84	1129.87	1121.92	1162.41	1165.34	1216.88	1156.89	1242.63	1250.07	1246	1235.07	1280.68
														96.5154	1219.22	1132.99	1124.64	1160.03	1165.51	1216.94	1156.71	1244.82	1247.61	1244.87	1237.03	1283.52
														96.5765	1221.79	1134.56	1123.58	1162.53	1162.3	1216.92	1158.32	1243.49	1252.39	1246.41	1241.1	1282.15
														96.6377	1223.61	1134.31	1126.69	1164.06	1167.36	1220.77	1161.34	1244.24	1256.07	1245.44	1241.54	1284.78
														96.6989	1224.16	1134.54	1125.49	1164.97	1164.96	1221.04	1158.53	1243.78	1254.81	1247.86	1240.94	1280.92
														96.76	1223.04	1131.36	1124.29	1163.62	1165.8	1219.25	1157.64	1242.54	1250.87	1248.72	1237.42	1283.24
														96.8212	1220.68	1132.46	1123.87	1163.98	1164.36	1215.81	1158.61	1246.17	1252.45	1246.4	1242.46	1282.75
														96.8824	1219.59	1134.53	1126.71	1165.73	1165.94	1216.71	1158.46	1244.83	1252.57	1249.09	1240.91	1286.34
														96.9436	1222.05	1137.02	1128.35	1166.7	1167.93	1221.59	1160.45	1245.81	1253.8	1248.49	1241.98	1287.04
														97.0047	1222.06	1134.71	1127.58	1165.52	1165.99	1220.48	1159.33	1244.41	1253.54	1247.03	1239.67	1283.34
														97.0659	1219.67	1130.36	1123.14	1160.69	1161.91	1216.08	1155.84	1243.52	1251.35	1244.61	1235.57	1281.65
														97.1271	1215.83	1130.73	1120.68	1157.53	1162.03	1217.01	1155.69	1237.85	1249.16	1240.99	1237.17	1276.94
														97.1882	1217.24	1132.69	1121.48	1162.94	1165.27	1217.36	1157.75	1243.97	1250.51	1240.3	1239.06	1282.46
														97.2493	1216.21	1132.99	1124.99	1163.99	1163	1216.11	1157.72	1240.12	1250.22	1246.39	1236.17	1279.12
														97.3106	1217.37	1131.99	1123.78	1162.34	1165.29	1216.97	1158.23	1242.5	1249.41	1243.62	1236.29	1282.32
														97.3716	1220.82	1134.14	1124.59	1163.93	1170.28	1219.06	1161.27	1246.47	1253.91	1247.93	1240.9	1288.88
														97.4329	1219.36	1131.9	1125.16	1162.25	1166.66	1219.63	1157.82	1245.57	1250.66	1246.62	1239.98	1281.71
														97.494	1213.74	1128.85	1119.96	1156.78	1159.86	1216.61	1154.92	1240.59	1248.3	1240.48	1235.65	1280.69
														97.5551	1219.13	1131.18	1124.18	1163.17	1165.2	1214.63	1156.92	1244.23	1251.57	1245.49	1235.54	1280.99
														97.6164	1216.94	1130.43	1120.19	1161.2	1162.82	1214.34	1156.48	1241.19	1248.92	1242.77	1237.21	1280.69
														97.6776	1220.77	1131.95	1125.86	1164.88	1168.29	1219.7	1160.32	1242.33	1256.04	1247.25	1241.81	1285.04
														97.7386	1217.92	1131.69	1120.86	1159.99	1161.48	1216.41	1157.68	1239.23	1250.82	1244.64	1236.81	1283.03
														97.7998	1216.64	1127.38	1120.57	1161.32	1159.88	1213.23	1154.62	1240.84	1246.31	1244.62	1235.17	1280.97
														97.861	1219.79	1131.25	1121.67	1160.53	1162.52	1216.79	1157.19	1242.09	1248.31	1241.17	1236.45	1280.84
														97.9221	1222.82	1134.9	1128.74	1168.83	1169.38	1222.73	1162.36	1248.16	1252.75	1251.25	1243.99	1286.87
														97.9834	1216.73	1127.54	1119.76	1162.73	1162.34	1214.99	1152.38	1239.29	1250.29	1241.66	1234.69	1280.14
														98.0445	1221.43	1130.59	1124.55	1165.37	1165.79	1217.62	1157.31	1242.23	1252.1	1247.5	1238.12	1282.67
														98.1056	1219.28	1130.23	1123.99	1166.09	1163.9	1218.27	1158.6	1243.6	1251.55	1245.91	1238.54	1281.82
														98.1668	1218.53	1128.37	1120.63	1157.37	1161.02	1214.36	1155.58	1239.13	1245.57	1242.22	1232.68	1276.8
														98.228	1215.33	1128.56	1120.25	1157.48	1162.04	1209.25	1153.31	1238.2	1243.64	1240.35	1234.74	1277.98
														98.2891	1217.81	1129.17	1121.4	1160.18	1161.71	1211.2	1154.61	1238.01	1247.06	1241.05	1234.3	1278.29
														98.3503	1216.2	1129.95	1122.58	1159.43	1162.43	1215	1156.76	1242.37	1249.54	1241.66	1233.42	1281.65
														98.4115	1219.9	1134.48	1125.34	1161.3	1166.63	1219.07	1157.75	1244.44	1251.1	1246.47	1237.32	1282.43
														98.4726	1220.09	1133.81	1125.8	1164.59	1165.72	1219.49	1160.15	1244.76	1250.54	1248.94	1240.7	1285.15
														98.5338	1218.13	1135.87	1125.69	1165.07	1166.62	1216.3	1161.13	1245.9	1254.35	1248.32	1239.45	1284.97
														98.595	1215.55	1130.09	1121.55	1159.16	1161.93	1214.18	1155.41	1240.87	1248.43	1242.68	1234.21	1278.46
														98.656	1211.73	1126.7	1120.21	1158.66	1162.07	1212.92	1153.66	1240.87	1246.83	1241.34	1231.27	1277.05
														98.7171	1213.75	1128.29	1121.83	1158.1	1160.98	1214.04	1155.23	1241.45	1247.99	1243.24	1236.22	1278.68
														98.7784	1220.04	1131.79	1124.06	1164.07	1165.95	1219.11	1160.11	1244.5	1250.79	1248.06	1239.24	1282.62
														98.8396	1220.65	1131.67	1123.83	1163.19	1166.89	1216.92	1158.56	1244.67	1251.37	1247.91	1237.94	1283.86
														98.9007	1214.46	1129.33	1120.86	1157.49	1162	1216.99	1155.32	1240.16	1249.2	1243.59	1233.56	1278.65
														98.962	1216.45	1125.53	1117.55	1156.29	1159.2	1215.3	1153.46	1237.66	1247.51	1240.53	1234.3	1278.89
														99.023	1220.04	1134.47	1125.75	1163.11	1165.43	1217.56	1157.78	1244.04	1248.25	1244.88	1235.37	1281.23
														99.0841	1220.69	1132.18	1121.6	1163.17	1164.86	1219.12	1159.07	1242.66	1254.39	1245.66	1239.66	1286.43
														99.1455	1219.92	1133.63	1122.37	1160.41	1161.63	1216.66	1157.64	1244.57	1251.68	1243.42	1234.95	1280.41
														99.2065	1213.16	1130.21	1119.49	1157.28	1160.51	1210.06	1154.82	1241.18	1246.2	1241.95	1232.3	1278.13
														99.2676	1215.75	1133.84	1121.88	1158.78	1163.64	1215.25	1156.48	1241.32	1249.05	1242.67	1236.11	1281.8
														99.3289	1218.01	1133.15	1121.07	1161.87	1163.19	1214.83	1156.69	1241.2	1248.7	1244.29	1235.22	1280.6
														99.3901	1218.68	1135.48	1123.86	1161.58	1164.32	1219.99	1157.33	1243.86	1251.97	1247.76	1237.07	1281.78
														99.451	1219.19	1132.6	1124.16	1162.31	1166.01	1215.71	1157.52	1243.58	1250.17	1245.66	1235.37	1280.07
														99.5125	1214.11	1131.4	1120.84	1157.9	1160.52	1212.73	1155.26	1238.57	1246.69	1240	1233.05	1276.87
														99.5736	1212.06	1129.24	1118.8	1159.73	1161.29	1211.88	1153.89	1238.51	1246.53	1239.79	1231.6	1278.88
														99.6346	1214.53	1131.36	1124.23	1162.06	1163.7	1213.56	1155.84	1239.34	1250.89	1242.46	1235.62	1280.75
														99.696	1218.58	1132.23	1123.15	1163.26	1165.08	1217.21	1158	1240.7	1250.06	1244.42	1236.8	1283.23
														99.7571	1217.03	1132.05	1121.27	1162.5	1161.89	1213.59	1158.06	1241.12	1251.58	1242.01	1232.92	1280.06
														99.8182	1214.52	1127.8	1117.37	1155.93	1158.88	1213.1	1152.4	1238.35	1247.93	1237.59	1227.99	1276.12
														99.8795	1215.22	1127.3	1118.54	1158.76	1160.22	1214.21	1153.37	1238.23	1249.83	1241.36	1233.87	1277.55
														99.9406	1216.53	1129.87	1120.94	1159.48	1161.43	1212.31	1155.87	1241.67	1248.38	1242.05	1232.63	1278.7
														100.002	1215.35	1131.83	1119.36	1159.54	1163.13	1213.58	1155.17	1243.17	1247.39	1244.58	1234.6	1281.52
														100.063	1216.25	1129.09	1123.22	1161.42	1162.92	1214.34	1157.13	1240.75	1249.68	1243.89	1233.09	1281.7
														100.124	1215.82	1130.57	1121.41	1165.3	1162.47	1215.51	1157.1	1239.55	1251.09	1242.46	1235.77	1279.95
														100.185	1214.52	1129.84	1123.67	1158.1	1160.28	1215.21	1155.96	1240.25	1249.48	1243.01	1236.27	1282.36
														100.246	1216.12	1129.62	1120.67	1160.26	1161.06	1214.48	1155.68	1241.41	1251.09	1241.93	1231.51	1280.3
														100.308	1214.34	1131.61	1121.15	1160.74	1160.74	1210.63	1153.93	1238.75	1248.5	1238.98	1231.01	1280.58
														100.369	1218.98	1132.67	1125.46	1163.75	1165.09	1217.36	1159.53	1242.91	1251.9	1245.87	1237.42	1284.05
														100.43	1217.68	1132.35	1124.74	1163.58	1161.94	1217.56	1158.83	1243.98	1250.1	1242.97	1237.91	1284.99
														100.491	1215.79	1128.87	1120.82	1160.57	1161.34	1214	1154.26	1237.03	1246.07	1239.06	1232.61	1278.54
														100.552	1212.68	1129.27	1117.58	1159.58	1161.65	1212.67	1155.5	1240.77	1247.57	1239.34	1229.28	1276.58
														100.613	1217.33	1131.58	1122.03	1161.24	1163.94	1215.68	1158.03	1242.48	1249.1	1243.14	1234.51	1281.12
														100.675	1216.87	1130.4	1123.47	1161.71	1164.09	1216.19	1157.57	1239.75	1249.74	1244.17	1237.1	1280.24
														100.736	1217.27	1130.12	1120.81	1157.77	1162.05	1217.38	1155.63	1238.27	1252	1242.76	1233.87	1277.04
														100.797	1216.31	1129.39	1121.74	1159.88	1161	1211.85	1154.07	1241.45	1247.15	1245.15	1235.55	1282.43
														100.858	1213.84	1129.85	1117.62	1159.46	1161.13	1214.75	1154.57	1242.69	1248.78	1240.45	1233.1	1279.22
														101.057	1215.09	1126.31	1121.85	1158.52	1159.81	1214.82	1154.31	1238.51	1248.17	1238.67	1231.05	1279.72
														101.345	1216.61	1130.39	1123.17	1158.9	1162.47	1212.48	1157.21	1241.95	1249.16	1240.2	1234.34	1280.33
														101.532	1215.09	1131.06	1121.93	1161.34	1162.01	1213.28	1157.38	1241.35	1249.45	1244.66	1235.51	1284.2
														101.594	1217.47	1132.95	1125.01	1163.79	1166.22	1218.56	1160.22	1244.37	1253.51	1245.68	1237.42	1283.65
														101.654	1216.4	1130.12	1124.07	1162.95	1163.64	1218.22	1158.84	1244.62	1252.24	1244.78	1237.15	1281.62
														101.714	1210.62	1125.63	1117.91	1153.48	1159	1211.73	1152.03	1237.12	1244.5	1237.89	1229.41	1275.53
														101.775	1207.82	1125.15	1116.32	1155.08	1155.21	1207.08	1149.66	1234.65	1246.41	1235.84	1228.8	1274
														101.837	1215.09	1129.2	1120.37	1157.43	1160.21	1213.74	1156.41	1241.49	1248.33	1240.08	1235.88	1280.65
														101.898	1213.98	1127.92	1119.39	1160.29	1159.76	1212.83	1155.33	1240.51	1248.79	1241.77	1233.55	1277.68
														101.959	1210.2	1126.34	1119.42	1153.65	1158.26	1211.68	1154.19	1235.7	1243.31	1240.82	1231.21	1278.23
														102.02	1217.62	1129.78	1121.62	1161.85	1163.06	1214.18	1156.68	1240.9	1248.78	1243.43	1234.45	1279.15
														102.081	1214.26	1125.85	1121.25	1160.61	1163.18	1214.4	1155.78	1240.76	1246.06	1243.54	1235.37	1279
														102.142	1211.44	1127.94	1119.72	1158.86	1159.85	1211.85	1153.62	1239.39	1243.82	1239.34	1232.93	1274.47
														102.204	1214.1	1130.27	1123.2	1160.76	1161.6	1214.17	1155.77	1243.21	1247.84	1242.57	1235.65	1279.97
														102.265	1213	1127.54	1122.35	1160.18	1162.89	1215.9	1155.31	1238.71	1246.78	1242.67	1233.2	1279.53
														102.326	1218.76	1132.27	1122.72	1161.72	1165.59	1216.52	1157.21	1241.54	1250.25	1244.39	1235.01	1280.81
														102.387	1213.96	1129.94	1122.34	1160.92	1163.98	1211.17	1155.78	1239.58	1247.49	1239.04	1228.24	1277.14
														102.448	1208.89	1124.34	1119.51	1156.45	1159.4	1209.41	1152.92	1237.46	1246.02	1235.27	1231.48	1276.24
														102.509	1212.12	1126.68	1121.06	1156.75	1160.07	1209.15	1152.7	1237.09	1249.43	1237.79	1234.01	1276.76
														102.57	1212.63	1128.27	1122.04	1158.39	1159.16	1211.18	1156.31	1240.12	1246.43	1243.72	1234.71	1277.64
														102.632	1213.72	1128.49	1119.47	1157.68	1160.54	1210.89	1153.92	1240.07	1249.14	1240.18	1233.24	1277.72
														102.693	1213.96	1129.47	1120.77	1163.01	1160.88	1213.02	1154.06	1240.37	1248.36	1241.07	1232.7	1280.4
														102.754	1209.16	1122.96	1116.27	1156.41	1157.49	1209.33	1150.38	1237.01	1243.36	1236.65	1230.29	1273.8
														102.815	1211.49	1127.01	1118.74	1157.97	1158.68	1214.08	1155.08	1238.29	1246.19	1240.48	1230.37	1278.64
														102.876	1211.22	1127.42	1118.71	1159.01	1159.79	1209.89	1154.84	1238.46	1248.47	1237.48	1231.64	1277.77
														102.938	1214.15	1127.69	1116.57	1160.03	1160.71	1213.14	1153.62	1236.75	1246.78	1239	1233.64	1277.86
														102.999	1214.07	1126.76	1119.8	1158.95	1157.99	1210.92	1154.01	1237.43	1247.52	1238.92	1231.89	1277.24
