# Supplementary material for: Mechanically stimulated ATP release from murine bone cells is regulated by a balance of injury and repair
Source: eLife. 2018 Oct 16;7:e37812. doi: 10.7554/eLife.37812 (PMC6205812; doi:10.7554/eLife.37812)
Supplement: Figure 3—source data 1. [file elife-37812-fig3-data1.xlsx]

## Sheet: Fig3
																								Panel E													Panel F									Panel G
																									vesicular density															Quinacrine
																										ctrl	iono	caFree	NEM										control (no mech)	Control (+mech)	iono	caFree	NEM					secondary responsiveness (proportion)
																										0.0754743	0	0.0878713	0.0596419										0	0.0101796	0.0833795	0.000625782	0.0107924
																										0.0650653	0	0.0702614	0.0899329										0	0.00248679	0.0728067	0	0.00310421						Control
																										0.0487365	0	0.0707464	0.0778469										0	0.000809498	0.0698513	0.00049401	0.00624541					mean	0.61492
																										0.0772309	0	0.0885329	0.103535										0	0.001554	0.0580179	0	0.00755235					std	0.249335
																										0.0663514	0	0.0878455	0.0835765										0	0.00815065	0.0381871	0.000552283	0.0033739					error	40.5475
																										0.0639541	0	0.0673491	0.0886136										0	0.0122744	0.0660214	0.000638842	0.011463					n	17
																										0.0528235	0	0.0887883	0.104451										0	0.00271792	0.0899054	0.000283849	0.00887813					sem	0.0604726
																										0.0608799	0	0.0741578	0.111449											0.00133049	0.0519895	0	0.00525429					p
																										0.127463		0.0652077	0.109347											0.00332681	0.0673465	0.000390092	0.0130035
																										0.0608065		0.11374	0.0961154											0.016662	0.0754743	0
																										0.0917826		0.0441324												0.00587921	0.0650653
																										0.0833795														0.00151534	0.0487365
																										0.0728067														0.000556638	0.0772309
																										0.0698513														0.00315002	0.0663514
																										0.0580179														0.0110689	0.0639541
																										0.0381871														0.0153191	0.0528235
																										0.0660214														0.00220143	0.0608799
																										0.0899054														0.00774685	0.127463
																										0.0519895														0.0191415	0.0608065
																										0.0673465														0.00484765	0.0917826
																										0.072723														0.0032763
																																								0.000288642
																																								0.00304356
																																								0.00832452
																																								0.00577868
																																								0.00788644
																										ctrl	iono	caFree	NEM											0.00377578
																									mean	0.0695617	0	0.0780576	0.092451											0.00021245
																									std	0.0186242	0	0.0180289	0.0160425											0.00563651
																									error	26.7736	#DIV/0!	23.0969	17.3524											0.000699627
																									n	21	8	11	10											0.00168472
																									sem	0.00406413	0	0.00543592	0.00507308											0.00426837
																									p		2.06267e-13	0.224415	0.00208936											0.000915192
																																								0.000625978
																																								0.00373071
																																								0.00119178
																									Anova: Single Factor															0.00256027
																									SUMMARY
																									Groups	Count	Sum	Average	Variance
																									ctrl	21	1.4608	0.0695617	0.000346859
																									iono	8	0	0	0
																									caFree	11	0.858633	0.0780576	0.000325041
																									NEM	10	0.92451	0.092451	0.000257362
																									ANOVA
																									Source of Variation	SS	df	MS	F	P-value	F crit
																									Between Groups	0.0436474	3	0.0145491	53.5243	4.84081e-15	2.80684								control (no mech)	Control (+mech)	iono	caFree	NEM
																									Within Groups	0.0125039	46	0.000271823										mean	0	0.00499509	0.0694037	0.000298486	0.0077408
																																						std	0	0.00482871	0.0190935	0.000277006	0.00355631
																									Total	0.0561512	49											error	#DIV/0!	96.6691	27.5108	92.8036	45.9424
																																						n	7	37	20	10	9
																																						sem	0	0.000793836	0.00426944	8.75968e-05	0.00118544
																																						p			2.28469e-12	9.23163e-07	0.0721842
																																						Anova: Single Factor
																																						SUMMARY
																																						Groups	Count	Sum	Average	Variance
																																						control (no mech)	7	0	0	0
																																						Control (+mech)	37	0.184818	0.00499509	2.33165e-05
																																						iono	20	1.38807	0.0694037	0.000364563
																																						caFree	10	0.00298486	0.000298486	7.67321e-08
																																						NEM	9	0.0696672	0.0077408	1.26474e-05
																																						ANOVA
																																						Source of Variation	SS	df	MS	F	P-value	F crit
																																						Between Groups	0.0651764	4	0.0162941	161.534	6.49532e-37	2.48889
																																						Within Groups	0.00786796	78	0.000100871
																																						Total	0.0730444	82
[truncated: 12 more columns]
