# Supplementary material for: Mechanically stimulated ATP release from murine bone cells is regulated by a balance of injury and repair
Source: eLife. 2018 Oct 16;7:e37812. doi: 10.7554/eLife.37812 (PMC6205812; doi:10.7554/eLife.37812)
Supplement: Figure 4—source data 1. [file elife-37812-fig4-data1.xlsx]

## Sheet: Fig4
																					Panel B									Panel C
																																									deformation
																						Rel. Time (s)	mIn	iLn	sIn					Rel. Time (s)	mIn	iLn	sIn	Rupture-Dependent Influx	reversible-dependency			irreversible Rupture-Dependent SEM			Rel. Time (s)	Mean of ROI Object 17 (Ratio Channel)	Mean of ROI Object 17 (Ratio Channel)	Mean of ROI Object 13 (Ratio Channel)	Mean of ROI Object 12 (Ratio Channel)	Mean of ROI Object 13 (Ratio Channel)	Mean of ROI Object 14 (Ratio Channel)	Mean of ROI Object 27 (Ratio Channel)	Mean of ROI Object 21 (Ratio Channel)
																						0	0.0222275	0.0321629	0.0285584					0	0.741642	0.766387	0.741478	-0.000164127	0.0247444			0.0282083	0.0205531		0	0.789994	0.757706	0.771099	0.693941	0.764264	0.66538	0.750061	0.703718
																						1.80066	0.00779306	0.0199407	0.0396657					0.510583	0.747136	0.764685	0.737519	-0.00961715	0.0175494			0.0290427	0.0219903		0.510583	0.803013	0.763982	0.769186	0.692926	0.762879	0.668694	0.785249	0.700289
																						3.6012	0.0177449	0.0207499	0.0295869					1.01489	0.744322	0.765177	0.737455	-0.00686624	0.0208553			0.0287299	0.021845		1.01489	0.787307	0.756124	0.766761	0.691558	0.761383	0.664205	0.793954	0.704231
																						4.25536	0.00662776	0.0308564	0.00759971					1.51646	0.74715	0.763047	0.738485	-0.00866537	0.0158965			0.0290761	0.0226583		1.51646	0.794025	0.764317	0.765698	0.690987	0.762743	0.656984	0.808398	0.707538
																						4.70344	0.00860962	-0.00452052	-0.0319902					2.02021	0.741901	0.764583	0.739304	-0.00259707	0.0226817			0.0286333	0.0207406		2.02021	0.784992	0.760609	0.76518	0.687913	0.758772	0.66647	0.769644	0.700289
																						5.35767	-0.0126635	-0.00322244	-0.00671199					2.52157	0.741895	0.764505	0.738563	-0.00333165	0.0226098			0.0287369	0.0208455		2.52157	0.785536	0.762021	0.763258	0.690354	0.756019	0.659081	0.780758	0.704231
																						6.0082	-0.00432777	-0.00376191	-0.020883					3.02612	0.741389	0.762545	0.738669	-0.00272013	0.0211555			0.0283319	0.0206875		3.02612	0.787441	0.762499	0.766089	0.690447	0.755921	0.663861	0.759287	0.707538
																						6.4565	-0.00824046	-0.0242446	0.0197895					3.52759	0.741449	0.760503	0.739044	-0.00240455	0.0190537			0.0277054	0.0204293		3.52759	0.782627	0.76499	0.761695	0.690081	0.758312	0.666075	0.765474	0.7063
																						7.11065	-0.00898898	-0.042856	-0.0346101					4.03093	0.748973	0.762141	0.739118	-0.00985464	0.0131676			0.0297504	0.0224664		4.03093	0.78512	0.766598	0.760244	0.690211	0.757134	0.663544	0.837451	0.707318
																						7.76332	-0.0287821	-0.0251044	-0.0310051					4.53283	0.74209	0.760718	0.738289	-0.0038015	0.018628			0.0280717	0.0205372		4.53283	0.786842	0.765974	0.75837	0.687871	0.757523	0.659017	0.770161	0.709746
																						8.21145	-0.0151642	-0.0297067	-0.0386589					5.0374	0.742274	0.760548	0.739711	-0.00256301	0.0182736			0.0283284	0.0199802		5.0374	0.786525	0.760438	0.76258	0.694108	0.754203	0.662635	0.76631	0.710316
																						8.86456	-0.0318782	-0.0430752	-0.0311458					5.5387	0.740766	0.758626	0.739064	-0.00170115	0.0178609			0.0278122	0.0203317		5.5387	0.784282	0.754757	0.754713	0.690964	0.749259	0.664244	0.77195	0.707147
																						9.51506	-0.0190854	-0.0345365	-0.0504807					6.04333	0.743525	0.761351	0.738324	-0.00520149	0.0178252			0.0282189	0.0208774		6.04333	0.783944	0.75437	0.763822	0.687476	0.758299	0.665542	0.785878	0.705658
																						9.96357	-0.023551	-0.0301787	-0.0647274					6.54534	0.74103	0.758961	0.737634	-0.00339668	0.0179308			0.0276757	0.0209977		6.54534	0.788095	0.760587	0.758725	0.687406	0.757457	0.661211	0.769238	0.703137
																						10.6168	-0.0276338	-0.0245143	-0.0666327					7.0491	0.742333	0.758894	0.739965	-0.00236785	0.016561			0.0284565	0.0215503		7.0491	0.781138	0.759251	0.757535	0.692004	0.746369	0.659606	0.802117	0.700851
																						11.2694	0.185608	0.146815	1					7.55063	0.721374	0.758399	0.748585	0.0272104	0.0370244			0.0304666	0.025173		7.55063	0.782374	0.757862	0.752746	0.687555	0.753951	0.666359	0.583467	0.705164
																						11.7175	0.612057	0.828662	0.810808					8.05505	1.31072	1.35889	1.81706	0.506342	0.0481744			0.312612	0.163481		8.05505	1.08506	1.1102	1.32255	1.04745	0.939513	1.10435	1.41575	1.38313
																						12.3685	0.674634	0.938392	0.410925					8.55639	1.91313	2.26632	3.34455	1.43143	0.353198			0.425918	0.242238		8.55639	1.48448	1.84912	1.59305	1.63456	1.69193	1.76155	1.83344	1.75178
																						13.0193	0.757175	0.983403	0.0264258					9.06045	2.49925	2.95412	4.31742	1.81817	0.45488			0.574551	0.334635		9.06045	2.34196	2.5015	1.91761	2.09906	2.51388	2.37894	2.46653	2.23365
																						13.4675	0.83434	1	-0.136372					9.56261	3.04961	3.5693	4.86737	1.81776	0.519693			0.539311	0.389903		9.56261	3.49121	2.85975	2.47113	2.48384	3.15107	2.90487	3.04389	2.57503
																						14.1222	0.876206	0.979753	-0.416133					10.0665	3.53277	3.89882	5.05268	1.51991	0.36605			0.524245	0.376749		10.0665	4.23021	3.37793	3.19701	2.89931	3.68792	3.34665	3.43776	2.93923
																						14.7747	0.93476	0.980638	-0.585167					10.5678	3.84854	4.17512	5.17549	1.32695	0.326573			0.497348	0.354632		10.5678	4.81161	3.62	3.69129	3.27379	3.94088	3.63296	3.62821	3.33027
																						15.2235	0.933578	0.936065	-0.714242					11.0714	4.05325	4.33329	5.24956	1.19631	0.280043			0.427198	0.353065		11.0714	5.07514	3.92848	3.90883	3.51505	4.17441	3.76571	3.80488	3.44823
																						15.8765	0.970825	0.918238	-0.848655					11.5728	4.18191	4.45209	5.34562	1.16371	0.270181			0.478196	0.347275		11.5728	5.25239	3.97161	4.07676	3.68909	4.33637	3.88441	3.97649	3.62003
																						16.5274	0.986731	0.891686	-1.00076					12.0774	4.24415	4.50155	5.49729	1.25314	0.257398			0.508005	0.31951		12.0774	5.33188	4.05611	4.1919	3.93112	4.34104	3.91814	3.97367	3.71406
																						16.9755	0.986569	0.859259	-1.08499					12.5786	4.33411	4.52735	5.32001	0.985904	0.193238			0.415117	0.325008		12.5786	5.38388	4.11059	4.265	3.92091	4.8	3.97956	4.06959	3.74112
																						17.6289	0.994352	0.824178	-1.21769
																						18.2802	1	0.782681	-1.30639					13.0831	4.40436	4.59709	5.45737	1.05301	0.192729			0.452065	0.3377		13.0831	5.38339	4.2347	4.25524	4.03052	4.97511	3.96967	4.01473	3.82596
																						18.7235	0.994684	0.765368	-1.36633					13.5854	4.40994	4.61493	5.49644	1.0865	0.204992			0.424407	0.305514		13.5854	5.46955	4.37478	4.31162	4.00719	4.52313	4.05017	4.14694	3.81489
																						19.3784	0.983312	0.756087	-1.45715					14.0892	4.37667	4.58486	5.47404	1.09737	0.208186			0.433493	0.30041		14.0892	5.47469	4.17966	4.32826	4.12057	4.52952	4.02716	4.02566	3.82913
																						20.0293	0.976209	0.707721	-1.53697					14.5906	4.40454	4.64339	5.57287	1.16832	0.238846			0.419829	0.3083		14.5906	5.35718	4.18311	4.34389	4.11496	4.82541	4.06764	4.09542	3.87306
																						20.4775	0.97336	0.690433	-1.57417					15.0942	4.39237	4.59495	5.55175	1.15938	0.202574			0.398722	0.29856		15.0942	5.37679	4.23045	4.33695	4.07843	4.60344	4.13778	4.09333	3.76375
																						21.1309	0.942688	0.671864	-1.64043					15.5969	4.38694	4.59209	5.55925	1.1723	0.205145			0.384959	0.288656		15.5969	5.3221	4.18993	4.33879	4.12107	4.62906	4.05972	4.08378	3.78208
																						21.7827	0.937023	0.649476	-1.69057					16.1013	4.37621	4.59603	5.72648	1.35028	0.219827			0.441326	0.288865		16.1013	5.27362	4.23347	4.36818	4.1648	4.56057	4.06971	4.05407	3.84175
																						22.2315	0.94	0.620261	-1.68023					16.6026	4.36302	4.59663	5.65402	1.291	0.233611			0.389289	0.281178		16.6026	5.37054	4.12257	4.38703	4.15879	4.55013	4.16473	3.99364	3.76464
																						22.8864	0.920326	0.592934	-1.77213					17.0106	4.30778	4.51802	5.57232	1.26454	0.210237			0.361276	0.287909		17.0106	5.15302	4.17163	4.28193	4.10014	4.62513	4.08549	3.95495	3.65223
																						23.5374	0.904309	0.572274	-1.82181					17.5106	4.32213	4.55381	5.60789	1.28576	0.231684			0.389597	0.301755		17.5106	5.20029	4.12908	4.31314	4.10043	4.7746	4.12615	3.90342	3.65205
																						23.9855	0.912373	0.560962	-1.84349					18.0106	4.28725	4.57025	5.66848	1.38123	0.283005			0.401334	0.304734		18.0106	5.23405	4.10897	4.29534	4.10789	4.59465	4.10992	3.90193	3.59987
																						24.4854	0.904709	0.536332	-1.84441					18.5106	4.25053	4.55718	5.70846	1.45793	0.306648			0.396713	0.297954		18.5106	5.03444	4.10704	4.25081	4.10509	4.66564	4.10142	3.83514	3.58325
																						24.9855	0.919603	0.50184	-1.8353					19.0105	4.24643	4.52078	5.6436	1.39717	0.274348			0.381983	0.294471		19.0105	4.99932	4.08217	4.26959	4.11324	4.71031	4.1117	3.78035	3.53529
																						25.4854	0.893354	0.488497	-1.85735					19.5106	4.22854	4.50161	5.70151	1.47296	0.273065			0.394136	0.288344		19.5106	4.95827	4.04182	4.19006	4.12715	4.57537	4.19307	3.76874	3.55466
																						25.9854	0.891474	0.457638	-1.85815					20.0106	4.20072	4.52383	5.69285	1.49213	0.323107			0.394992	0.307575		20.0106	5.02271	4.03054	4.21279	4.05578	4.61906	4.07397	3.71788	3.5327
																						26.4854	0.886966	0.456972	-1.90189					20.5106	4.20337	4.5026	5.63095	1.42757	0.299228			0.394258	0.305175		20.5106	4.92313	3.96631	4.18398	4.01298	4.98698	4.18194	3.65951	3.57936
																						26.9855	0.855128	0.430244	-1.93531					21.0106	4.17252	4.43426	5.56933	1.39681	0.261737			0.343504	0.281968		21.0106	4.89645	4.15069	4.19879	4.07882	4.57544	4.10278	3.62239	3.50726
																						27.4854	0.841068	0.417389	-2.00143					21.5106	4.10304	4.45915	5.67319	1.57015	0.356112			0.365018	0.2891		21.5106	4.77369	3.92981	4.15134	4.00588	4.4664	4.04729	3.64659	3.42097
																						27.9854	0.85068	0.391251	-2.01524					22.0105	4.08288	4.40909	5.64099	1.55811	0.326216			0.391176	0.30493		22.0105	4.70878	3.91458	4.05137	4.02077	4.84116	4.04513	3.57373	3.38232
																						28.4855	0.829781	0.357105	-2.02533					22.5105	4.07562	4.3825	5.71571	1.64008	0.306875			0.384276	0.298848		22.5105	4.72819	3.9189	4.06007	4.01246	4.85694	4.03454	3.54811	3.33413
																						28.9854	0.816155	0.340314	-1.97813					23.0106	4.0607	4.38575	5.56317	1.50246	0.325052			0.353519	0.29919		23.0106	4.61036	3.96336	4.02448	3.9812	4.52507	3.97789	3.50869	3.3371
																						29.4855	0.807998	0.314327	-1.98292					23.5106	4.09204	4.41639	5.60845	1.51642	0.324356			0.389586	0.328321		23.5106	4.65959	3.94595	4.01074	4.05286	5.32181	4.00249	3.50223	3.29848
																						29.9855	0.815151	0.314917	-2.04573					24.0106	3.97577	4.35961	5.55607	1.5803	0.383844			0.392732	0.303459		24.0106	4.59935	3.89173	3.97689	3.95023	4.53605	3.98967	3.47402	3.25598
																						30.4854	0.80087	0.27761	-2.0246					24.5106	3.9721	4.42293	5.67044	1.69834	0.450834			0.384331	0.308306		24.5106	4.50363	3.84141	3.97631	3.92595	4.70158	3.97209	3.40728	3.29078
																						30.9854	0.79614	0.250325	-2.06436					25.0105	3.9015	4.387	5.71927	1.81776	0.485494			0.372442	0.322164		25.0105	4.4079	3.84519	3.8907	3.98019	4.36096	3.87247	3.37703	3.27947
																						31.4854	0.78299	0.25695	-2.06783					25.5106	3.99233	4.28787	5.62134	1.62901	0.295538			0.384648	0.335944		25.5106	4.52327	3.83027	3.91342	3.94201	5.31951	3.86835	3.37043	3.19403
																						31.9854	0.791403	0.22744	-2.06816					26.0106	3.89823	4.314	5.62305	1.72483	0.415773			0.361379	0.323585		26.0106	4.39326	3.89007	3.95081	3.89762	4.44064	3.89065	3.30075	3.13448
																						32.4855	0.786852	0.207075	-2.09347					26.5106	3.82478	4.24416	5.5847	1.75992	0.419375			0.346954	0.298488		26.5106	4.29573	3.80983	3.86935	3.85246	4.42024	3.85202	3.31064	3.1373
																						32.9855	0.775845	0.183094	-2.11667					27.0106	3.84155	4.20036	5.65708	1.81553	0.358811			0.372407	0.304519		27.0106	4.24361	3.83744	3.8057	3.89685	4.48925	3.87455	3.28967	3.13376
																						33.4855	0.748678	0.167408	-2.12952					27.5106	3.83872	4.22782	5.55642	1.71771	0.389099			0.37535	0.33409		27.5106	4.24512	3.81449	3.82083	3.86278	4.76001	3.85517	3.23959	3.08411
																						33.9855	0.750081	0.155337	-2.14501					28.0106	3.79971	4.20866	5.69953	1.89982	0.408946			0.382569	0.330235		28.0106	4.17438	3.80343	3.84402	3.83211	4.64058	3.89825	3.16323	3.06215
																						34.4854	0.751663	0.143124	-2.14941					28.5106	3.77415	4.18807	5.58322	1.80907	0.413922			0.387222	0.322413		28.5106	4.05738	3.8338	3.75885	3.83797	4.72723	3.77938	3.15903	3.02272
																						34.9855	0.734133	0.119589	-2.15065					29.0105	3.70626	4.1651	5.69165	1.98539	0.458836			0.378807	0.321741		29.0105	4.04496	3.82499	3.74559	3.77674	4.20002	3.79433	3.13959	2.98323
																						35.4854	0.722556	0.101754	-2.14314					29.5106	3.74974	4.20513	5.50706	1.75732	0.45539			0.34984	0.355704		29.5106	3.97733	3.78234	3.70899	3.83071	4.94203	3.71845	3.1394	2.99536
																						35.9854	0.734898	0.0950355	-2.1067					30.0106	3.67622	4.13698	5.51766	1.84144	0.460766			0.39063	0.337194		30.0106	3.9374	3.78411	3.69212	3.78526	4.37964	3.748	3.10831	2.92483
																						36.4855	0.719009	0.0763314	-2.08155					30.5106	3.64144	4.13597	5.63474	1.9933	0.494534			0.381869	0.341657		30.5106	3.90923	3.75452	3.64362	3.73033	4.33621	3.74379	3.06405	2.8792
																						36.9854	0.701649	0.0611253	-2.09837					31.0106	3.62129	4.06884	5.41246	1.79117	0.447542			0.304085	0.340872		31.0106	3.92589	3.78023	3.65708	3.74283	4.20821	3.72336	3.01973	2.89612
																						37.4855	0.703631	0.0405751	-2.13371					31.5106	3.57953	4.08964	5.33347	1.75394	0.510115			0.338941	0.331734		31.5106	3.92195	3.70232	3.65402	3.7147	4.01761	3.69903	3.00815	2.84478
																						37.9855	0.698493	0.0338993	-2.16108					32.0106	3.59587	4.02693	5.4266	1.83074	0.431061			0.338605	0.33877		32.0106	3.79968	3.76257	3.8939	3.7108	4.08713	3.73264	3.02018	2.77748
																						38.4855	0.690608	0.00851086	-2.15212					32.5106	3.56489	4.02599	5.39369	1.8288	0.461097			0.313499	0.345108		32.5106	3.84056	3.67314	3.60514	3.71487	4.27419	3.65193	2.9526	2.80151
																						38.9855	0.686585	-0.0245565	-2.15803					33.0106	3.53384	3.99135	5.61551	2.08167	0.45751			0.365549	0.350535		33.0106	3.82856	3.71202	3.59065	3.66003	4.0686	3.62275	2.9948	2.7513
																						39.4855	0.685743	-0.012014	-2.15569					33.5106	3.52807	3.992	5.51227	1.9842	0.463929			0.366158	0.352164		33.5106	3.77489	3.68662	3.5724	3.71481	4.14913	3.67495	2.92435	2.75923
																						39.9855	0.662803	-0.0387089	-2.16345					34.0106	3.48213	3.97524	5.45455	1.97242	0.493112			0.354217	0.364253		34.0106	3.70319	3.67381	3.50416	3.67358	4.09156	3.58044	2.91277	2.68224
																						40.4856	0.666001	-0.0525832	-2.14811					34.5106	3.46457	4.01626	5.34181	1.87724	0.551698			0.316011	0.374753		34.5106	3.70886	3.64374	3.48007	3.63882	4.1147	3.64431	2.83288	2.69221
																						40.9854	0.668306	-0.0592675	-2.16069					35.0105	3.41927	3.93189	5.31672	1.89745	0.512622			0.366434	0.361255		35.0105	3.64527	3.63822	3.45914	3.63223	3.96167	3.60062	2.85067	2.65019
																						41.4854	0.656287	-0.0791264	-2.20292					35.5106	3.40703	3.89765	5.33922	1.93219	0.490622			0.323459	0.365385		35.5106	3.64173	3.64819	3.44653	3.61016	4.07769	3.53327	2.79831	2.57962
																						41.9855	0.656747	-0.111031	-2.1908					36.0106	3.39443	3.90985	5.31616	1.92173	0.515422			0.36074	0.357021		36.0106	3.63749	3.61209	3.40829	3.61755	4.01493	3.53957	2.77714	2.64781
																						42.4855	0.653821	-0.106336	-2.19984					36.5106	3.36001	3.86758	5.23609	1.87608	0.507566			0.334997	0.369328		36.5106	3.59114	3.55956	3.37868	3.57526	3.96396	3.53953	2.77725	2.55972
																						42.9855	0.649066	-0.123093	-2.17792					37.0106	3.3312	3.85111	5.24168	1.91048	0.519904			0.338657	0.371772		37.0106	3.54241	3.58626	3.33766	3.57577	3.94795	3.49209	2.76452	2.53418
																						43.4854	0.621728	-0.145978	-2.20007					37.5106	3.30731	3.79385	5.33563	2.02832	0.486546			0.380132	0.348486		37.5106	3.55582	3.59553	3.29067	3.54389	3.87491	3.41864	2.72835	2.50972
																						43.9855	0.630174	-0.149307	-2.20715					38.0056	3.28679	3.8163	5.21497	1.92818	0.529512			0.381713	0.367498		38.0056	3.54397	3.55174	3.28182	3.52073	3.88246	3.41367	2.71445	2.45843
																						44.4855	0.63487	-0.153446	-2.20057					38.5106	3.27161	3.76129	5.21159	1.93997	0.489679			0.372862	0.36451		38.5106	3.48179	3.58211	3.25945	3.56111	3.88713	3.38094	2.69801	2.43949
																						44.9855	0.627512	-0.181498	-2.2155					39.0106	3.24584	3.78609	5.25838	2.01253	0.540248			0.34995	0.351861		39.0106	3.43948	3.57148	3.19271	3.52703	3.78303	3.40165	2.6746	2.39872
																						45.4854	0.612695	-0.194571	-2.21868					39.5106	3.23243	3.75347	5.40385	2.17142	0.521038			0.36336	0.37803		39.5106	3.42552	3.53011	3.19573	3.52579	3.86237	3.33841	2.66288	2.37968
																						45.9855	0.604172	-0.202065	-2.19703					40.0106	3.19985	3.70788	5.1243	1.92445	0.508034			0.328107	0.366388		40.0106	3.3584	3.5369	3.12506	3.52971	3.83853	3.33632	2.62158	2.37412
																						46.4854	0.613664	-0.21529	-2.15721					40.5106	3.22929	3.70472	5.20684	1.97755	0.47543			0.365487	0.375353		40.5106	3.34902	3.48572	3.17041	3.49396	4.14129	3.37722	2.58475	2.37214
																						46.9855	0.600123	-0.233084	-2.18776					41.0106	3.16793	3.74346	5.09403	1.9261	0.575533			0.32848	0.389909		41.0106	3.32941	3.49186	3.07821	3.45704	3.94311	3.2475	2.56484	2.28268
																						47.4854	0.588759	-0.23718	-2.21807					41.5106	3.13666	3.62008	5.16268	2.02602	0.483428			0.339804	0.357888		41.5106	3.33375	3.46793	3.07701	3.47052	3.73824	3.2197	2.5711	2.29566
																						47.9855	0.603781	-0.262594	-2.20438					42.0106	3.11534	3.64439	5.08786	1.97251	0.529046			0.313379	0.372141		42.0106	3.31453	3.44366	3.04416	3.49206	3.67418	3.18923	2.57006	2.33469
																						48.4855	0.580049	-0.282655	-2.2049					42.5106	3.09448	3.66278	5.15802	2.06353	0.568298			0.349657	0.386513		42.5106	3.27706	3.48779	2.99312	3.45803	3.66703	3.20537	2.52949	2.2045
																						48.9855	0.574231	-0.283465	-2.19646					43.0106	3.06639	3.58592	5.20481	2.13842	0.519523			0.374754	0.369931		43.0106	3.27621	3.48184	2.97104	3.41998	3.63928	3.12958	2.53287	2.20741
																						49.4855	0.577225	-0.288986	-2.1922					43.5106	3.05768	3.5664	5.09535	2.03767	0.508717			0.333419	0.36446		43.5106	3.25319	3.55468	2.93602	3.42504	3.63696	3.08712	2.4805	2.18659
																						49.9855	0.576902	-0.307597	-2.19465					44.0106	3.03576	3.56938	5.12349	2.08773	0.533618			0.360696	0.373391		44.0106	3.16506	3.55115	2.92047	3.41148	3.64089	3.07697	2.46313	2.15008
																						50.4854	0.553001	-0.319954	-2.19961					44.5106	2.99168	3.51559	5.15817	2.16649	0.523905			0.352004	0.374119		44.5106	3.16702	3.39309	2.91636	3.38232	3.54354	3.00671	2.48372	2.12685
																						50.9855	0.571424	-0.308558	-2.20341					45.0106	3.0049	3.48266	5.05848	2.05357	0.477758			0.315202	0.364546		45.0106	3.1458	3.4154	2.91118	3.37647	3.82594	2.98607	2.46443	2.07379
																						51.4855	0.557968	-0.345376	-2.23753					45.5106	2.95339	3.53719	5.05394	2.10056	0.583806			0.367795	0.402766		45.5106	3.09413	3.36094	2.89853	3.4258	3.51019	3.00559	2.43233	2.0269
																						51.9804	0.546426	-0.352128	-2.20073					46.0106	2.93391	3.46084	4.91935	1.98543	0.52693			0.310644	0.361146		46.0106	3.10878	3.39242	2.85285	3.36062	3.42211	2.93931	2.45345	2.04515
																						52.4855	0.529975	-0.371903	-2.23752					46.5106	2.90723	3.50954	5.11852	2.21129	0.602309			0.342704	0.383965		46.5106	3.07851	3.32754	2.87436	3.30272	3.42892	2.89082	2.37268	2.05324
																						52.9855	0.527551	-0.38501	-2.22405					47.0106	2.88392	3.43629	5.05063	2.16671	0.552366			0.322265	0.366625		47.0106	3.06977	3.33871	2.82789	3.331	3.34256	2.88328	2.38322	1.99511
																						53.4855	0.537809	-0.386316	-2.20048					47.5106	2.85749	3.48228	5.10287	2.24538	0.624788			0.339869	0.379845		47.5106	3.02624	3.27491	2.79585	3.30632	3.36274	2.83563	2.36873	2.02595
																						53.9855	0.507554	-0.389342	-2.22255					48.0106	2.85524	3.39636	4.67995	1.82471	0.541119			0.345807	0.374196		48.0106	2.98809	3.26556	2.80036	3.27838	3.5548	2.80007	2.36655	1.99671
																						54.4855	0.517276	-0.415523	-2.24991					48.5105	2.8132	3.46668	4.92926	2.11605	0.653476			0.320023	0.377321		48.5105	2.99035	3.27699	2.75249	3.26481	3.26433	2.79688	2.35228	1.9469
																						54.9855	0.515379	-0.406917	-2.20904					49.0106	2.78969	3.37411	4.93591	2.14622	0.584416			0.328327	0.378785		49.0106	2.9594	3.21355	2.74447	3.29143	3.25733	2.73883	2.3411	1.94708
																						55.4855	0.499125	-0.437439	-2.17374					49.5106	2.78472	3.37356	4.91704	2.13232	0.588832			0.332784	0.382949		49.5106	2.99083	3.22242	2.7247	3.24919	3.21805	2.77708	2.33231	1.92416
																						55.9805	0.502765	-0.445607	-2.19393					50.0106	2.75047	3.37728	5.0604	2.30993	0.62681			0.34759	0.383875		50.0106	2.95808	3.2049	2.73295	3.23333	3.16849	2.72312	2.31175	1.88974
																						56.4855	0.484171	-0.467244	-2.19007					50.5106	2.75655	3.33079	5.01302	2.25647	0.574243			0.351064	0.374978		50.5106	2.93392	3.21059	2.70633	3.25269	3.14863	2.72984	2.36001	1.9139
																						56.9855	0.486238	-0.469571	-2.22834					51.0106	2.71259	3.31524	5.02103	2.30844	0.602646			0.340804	0.373823		51.0106	2.90568	3.15491	2.68293	3.21993	3.10347	2.68324	2.31735	1.86676
																						57.4854	0.47712	-0.486201	-2.22464					51.5106	2.6984	3.31465	4.89907	2.20068	0.616254			0.32567	0.385905		51.5106	2.89859	3.12357	2.67257	3.23243	3.06852	2.6796	2.36979	1.83191
																						57.9854	0.459564	-0.495515	-2.2024					52.0106	2.69906	3.27849	5.00311	2.30405	0.579425			0.363411	0.380078		52.0106	2.86634	3.12245	2.68338	3.19313	3.32069	2.6759	2.28869	1.82393
																						58.4855	0.487208	-0.493947	-2.21829					52.5107	2.65858	3.25983	4.91532	2.25674	0.601242			0.346388	0.372073		52.5107	2.87246	3.13265	2.61827	3.20102	3.01853	2.66283	2.27404	1.79593
																						58.9855	0.482275	-0.510114	-2.20212					53.0106	2.63167	3.2326	4.94427	2.31261	0.600931			0.359827	0.373014		53.0106	2.83145	3.06305	2.6031	3.15695	2.99369	2.66718	2.26918	1.76989
																						59.4804	0.448898	-0.519471	-2.21241					53.5106	2.62729	3.26613	4.97814	2.35085	0.638845			0.361487	0.374707		53.5106	2.83946	3.08031	2.62132	3.14884	2.98771	2.63776	2.23014	1.76853
																						59.9855	0.446839	-0.54534	-2.2123					54.0106	2.59645	3.2728	4.81959	2.22314	0.676341			0.350389	0.39473		54.0106	2.83547	3.00668	2.60548	3.14487	2.95868	2.62281	2.20759	1.74051
																						60.4855	0.45782	-0.543645	-2.21515					54.5105	2.56858	3.23498	4.86801	2.29943	0.6664			0.328166	0.372024		54.5105	2.79782	3.00032	2.55821	3.15049	2.8824	2.60724	2.21046	1.73197
																						60.9855	0.447528	-0.544396	-2.21985					55.0106	2.56749	3.22529	4.80626	2.23876	0.657794			0.328757	0.377251		55.0106	2.76713	2.97196	2.57976	3.13222	2.89907	2.62598	2.19164	1.70943
																						61.4855	0.454665	-0.548408	-2.20442					55.5106	2.5422	3.19512	4.9666	2.4244	0.65292			0.345666	0.381502		55.5106	2.80845	2.91869	2.54258	3.08923	2.86862	2.60263	2.2019	1.69304
																						61.9855	0.435118	-0.562822	-2.20893					56.0106	2.52998	3.21556	4.91707	2.38709	0.685577			0.373629	0.39545		56.0106	2.76866	2.90191	2.54334	3.08519	2.89996	2.58373	2.16312	1.66969
																						62.4854	0.433451	-0.579284	-2.20614					56.5066	2.51088	3.19147	4.73906	2.22819	0.680595			0.330391	0.379533		56.5066	2.69238	2.87499	2.53292	3.06638	2.84866	2.57716	2.18838	1.679
																						62.9855	0.430704	-0.599716	-2.19561					57.0106	2.50887	3.15765	4.89486	2.38599	0.648781			0.339522	0.376939		57.0106	2.70159	2.9683	2.52171	3.06351	2.81692	2.57259	2.17256	1.67873
																						63.4854	0.434072	-0.598999	-2.20552					57.5106	2.5143	3.16068	4.75682	2.24252	0.646384			0.358181	0.372057		57.5106	2.71728	2.87688	2.51812	3.05182	2.99244	2.5843	2.16248	1.64685
																						63.9854	0.424809	-0.611137	-2.20289					58.0106	2.49602	3.16594	4.82128	2.32526	0.669922			0.367429	0.386329		58.0106	2.68587	2.82745	2.5177	3.09141	3.03304	2.53791	2.13857	1.63871
																						64.4855	0.418064	-0.624211	-2.22585					58.5106	2.46658	3.15188	4.94533	2.47875	0.685295			0.335259	0.373864		58.5106	2.6687	2.79108	2.48474	3.04187	2.82459	2.54653	2.21506	1.6115
																						64.9854	0.410273	-0.624228	-2.20792					59.0106	2.46154	3.13558	4.70047	2.23893	0.674049			0.341205	0.376033		59.0106	2.6345	2.76757	2.49537	3.0417	2.89899	2.53971	2.14994	1.58668
																						65.4854	0.397208	-0.640057	-2.21645					59.5106	2.43876	3.17667	4.78526	2.34649	0.737911			0.34475	0.386067		59.5106	2.65328	2.76766	2.46817	3.00556	2.75406	2.53793	2.10862	1.60894
																						65.9855	0.410706	-0.646346	-2.18305					60.0056	2.42957	3.15408	4.89361	2.46404	0.72451			0.392073	0.383616		60.0056	2.63839	2.69897	2.48478	2.99058	2.73826	2.58161	2.1168	1.59489
																						66.4855	0.404523	-0.660422	-2.19756					60.5106	2.41513	3.0873	4.87566	2.46053	0.672169			0.388606	0.367365		60.5106	2.62681	2.70594	2.46016	2.99098	2.807	2.50976	2.08993	1.57182
																						66.9854	0.394937	-0.657767	-2.17854					61.0106	2.40682	3.1219	4.83619	2.42937	0.71508			0.372475	0.398431		61.0106	2.65252	2.68053	2.46117	2.9848	2.74113	2.51033	2.08452	1.55917
																						67.4854	0.389042	-0.67465	-2.2323					61.5106	2.39805	3.08776	4.91356	2.51551	0.689712			0.361851	0.360566		61.5106	2.5762	2.68218	2.43418	2.95812	2.76346	2.52624	2.11284	1.54861
																						67.9854	0.378078	-0.681942	-2.2007					62.0106	2.38032	3.11027	4.83035	2.45003	0.729947			0.348711	0.386664		62.0106	2.5446	2.64435	2.44434	2.97033	2.72708	2.48883	2.08655	1.55525
																						68.4855	0.363048	-0.676631	-2.2183					62.5106	2.43064	3.08435	4.71309	2.28244	0.653706			0.335769	0.388685		62.5106	2.56018	2.65895	2.45265	2.95599	3.21702	2.48726	2.0791	1.55396
																						68.9855	0.369019	-0.697122	-2.19142					63.0106	2.36396	3.05273	4.73057	2.36661	0.688768			0.349306	0.354837		63.0106	2.53716	2.63027	2.44576	2.92285	2.70985	2.52642	2.04417	1.51735
																						69.4854	0.367922	-0.703065	-2.19657					63.5105	2.41386	3.08424	4.63203	2.21817	0.670381			0.324169	0.393914		63.5105	2.54059	2.62504	2.44793	2.96592	3.22742	2.4907	2.06219	1.51469
																						69.9855	0.376309	-0.71763	-2.20627					64.0105	2.39731	3.03567	4.75253	2.35522	0.63836			0.335999	0.36966		64.0105	2.52189	2.62665	2.47147	2.93594	2.99701	2.54897	2.05949	1.52435
																						70.4854	0.360292	-0.721348	-2.19951					64.5106	2.3467	3.06055	4.65481	2.30811	0.713852			0.343627	0.37594		64.5106	2.4804	2.60194	2.46891	2.92721	2.72897	2.47058	2.07935	1.49258
																						70.9854	0.351846	-0.729591	-2.20776					65.0106	2.34259	3.05563	4.69381	2.35122	0.71304			0.377588	0.378418		65.0106	2.46281	2.60901	2.44844	2.88517	2.73599	2.4677	2.05441	1.49043
																						71.4854	0.354568	-0.735222	-2.19857					65.5106	2.34559	3.05603	4.76523	2.41964	0.710444			0.376287	0.375669		65.5106	2.48019	2.61591	2.49079	2.91129	2.71938	2.47945	2.02122	1.49038
																						71.9854	0.344752	-0.736225	-2.19496					66.0106	2.33568	3.02414	4.7063	2.37062	0.688457			0.360352	0.375954		66.0106	2.44417	2.61248	2.44933	2.9016	2.69802	2.49904	2.02155	1.50665
																						72.4854	0.341945	-0.754533	-2.19947					66.5106	2.3292	3.01249	4.65605	2.32685	0.683296			0.354877	0.3623		66.5106	2.46971	2.55989	2.43191	2.8818	2.73204	2.4958	2.04073	1.474
																						72.9855	0.345024	-0.765954	-2.18361					67.0106	2.32322	3.0344	4.77284	2.44962	0.711175			0.34604	0.388554		67.0106	2.4241	2.56698	2.42464	2.88677	2.80068	2.45798	2.02458	1.46262
																						73.4804	0.331253	-0.767918	-2.21066					67.5106	2.30562	2.96823	4.78301	2.47739	0.662609			0.361504	0.361383		67.5106	2.44728	2.55931	2.44686	2.88165	2.65914	2.45008	1.98165	1.46683
																						73.9854	0.317636	-0.786235	-2.20657					68.0106	2.32432	2.99285	4.67295	2.34863	0.668529			0.389707	0.369436		68.0106	2.40593	2.56924	2.44867	2.85206	2.91956	2.46508	1.9773	1.44182
																						74.4855	0.335515	-0.783099	-2.18459					68.5106	2.29393	2.95908	4.60271	2.30878	0.665152			0.352962	0.361739		68.5106	2.42429	2.56771	2.43513	2.86424	2.64165	2.44736	1.97051	1.45346
																						74.9854	0.341392	-0.788089	-2.21497					69.0066	2.29284	3.01159	4.63923	2.34639	0.718747			0.397239	0.387429		69.0066	2.40567	2.57246	2.41305	2.86096	2.62749	2.46977	2.03639	1.42158
																						75.4854	0.31545	-0.795271	-2.17616					69.5106	2.29032	2.94342	4.60982	2.31951	0.653108			0.36003	0.348304		69.5106	2.39149	2.55694	2.45008	2.82417	2.66271	2.48156	1.97639	1.41804
																						75.9855	0.320077	-0.815694	-2.14597					70.0056	2.28297	2.93232	4.64302	2.36004	0.64935			0.363802	0.360199		70.0056	2.39405	2.54928	2.42258	2.80719	2.62907	2.44788	1.9867	1.43687
																						76.4854	0.30662	-0.802941	-2.16816					70.5106	2.27841	2.96054	4.64625	2.36784	0.682126			0.359883	0.362866		70.5106	2.35751	2.57443	2.40951	2.7886	2.58705	2.43328	2.00836	1.47082
																						76.9855	0.312328	-0.824419	-2.18113					71.0106	2.27021	2.94988	4.62763	2.35742	0.679667			0.37092	0.36374		71.0106	2.37241	2.52928	2.42226	2.77147	2.63812	2.44777	1.96014	1.42649
																						77.4855	0.314208	-0.832654	-2.18821					71.5106	2.25359	2.94647	4.72665	2.47306	0.692879			0.39955	0.363562		71.5106	2.3592	2.51402	2.40467	2.75822	2.59875	2.4236	1.92742	1.41571
																						77.9855	0.280235	-0.831086	-2.17754					72.0106	2.25721	2.93865	4.45334	2.19613	0.681446			0.345725	0.353692		72.0106	2.34987	2.50154	2.39967	2.75043	2.61798	2.44593	1.96914	1.39736
																						78.4854	0.303533	-0.845845	-2.17491					72.5106	2.24411	2.91545	4.53961	2.2955	0.671339			0.361836	0.351341		72.5106	2.33894	2.496	2.38741	2.7186	2.56731	2.42597	1.95579	1.39283
																						78.9855	0.283323	-0.85312	-2.18339					73.0106	2.24127	2.95029	4.4686	2.22733	0.709015			0.34397	0.363163		73.0106	2.31499	2.45451	2.42317	2.72222	2.58765	2.42698	1.94744	1.40003
																						79.4854	0.298574	-0.863302	-2.18254					73.5106	2.2411	2.94095	4.58928	2.34818	0.699853			0.366497	0.357414		73.5106	2.31878	2.49126	2.41347	2.70591	2.56868	2.45872	1.93657	1.37782
																						79.9804	0.272903	-0.88338	-2.16255					74.0106	2.23752	2.92053	4.38804	2.15052	0.683009			0.364019	0.359761		74.0106	2.33371	2.4624	2.39601	2.72508	2.60874	2.43183	1.94782	1.35503
																						80.4855	0.280108	-0.880792	-2.16772					74.5106	2.22591	2.92052	4.53282	2.30691	0.694605			0.357434	0.362004		74.5106	2.32219	2.42862	2.40083	2.7045	2.55945	2.43302	1.93718	1.36986
																						80.9855	0.277148	-0.889702	-2.16776					75.0106	2.22589	2.90988	4.68624	2.46035	0.68399			0.405062	0.361797		75.0106	2.29635	2.43115	2.38545	2.70783	2.58877	2.4293	1.93785	1.35776
																						81.4855	0.264117	-0.892037	-2.19045					75.5106	2.21176	2.87769	4.59104	2.37928	0.665925			0.400543	0.353484		75.5106	2.29656	2.40397	2.38293	2.69808	2.56786	2.41133	1.92791	1.3496
																						81.9854	0.250916	-0.8969	-2.17894					76.0106	2.21528	2.90854	4.52322	2.30795	0.693263			0.35288	0.345687		76.0106	2.28843	2.44336	2.38852	2.69187	2.56873	2.40142	1.9206	1.34902
																						82.4855	0.241287	-0.898864	-2.17419					76.5106	2.21744	2.86103	4.52672	2.30929	0.643592			0.381128	0.358116		76.5106	2.29153	2.37958	2.37753	2.68755	2.66519	2.4251	1.91094	1.33506
																						82.9854	0.258537	-0.903037	-2.15976					77.0106	2.20084	2.86262	4.58127	2.38043	0.66178			0.401831	0.367841		77.0106	2.25071	2.39265	2.38854	2.7094	2.52988	2.4272	1.91151	1.33358
																						83.4855	0.254922	-0.92566	-2.18623					77.5106	2.19236	2.81485	4.32763	2.13526	0.622485			0.343676	0.336935		77.5106	2.22698	2.36933	2.3886	2.67521	2.52716	2.39645	1.89027	1.32543
																						83.9855	0.266243	-0.920586	-2.17069					78.0106	2.21068	2.82897	4.62519	2.41451	0.618292			0.418059	0.348315		78.0106	2.26001	2.35196	2.3972	2.68189	2.69435	2.41066	1.88439	1.33289
																						84.4855	0.236787	-0.922449	-2.17105					78.5106	2.18824	2.83275	4.47358	2.28534	0.644515			0.355119	0.349726		78.5106	2.28157	2.36459	2.39213	2.662	2.5226	2.41997	1.85254	1.30993
																						84.9804	0.223374	-0.937571	-2.15685					79.0106	2.19904	2.83729	4.35817	2.15913	0.638251			0.373727	0.353531		79.0106	2.24159	2.40379	2.39073	2.68134	2.51898	2.40585	1.90019	1.34058
																						85.4855	0.238812	-0.94396	-2.1673					79.5106	2.18551	2.82956	4.37302	2.18751	0.64405			0.378287	0.345726		79.5106	2.24458	2.37094	2.38601	2.6776	2.53878	2.36587	1.87396	1.32641
																						85.9855	0.22863	-0.958281	-2.15401					80.0106	2.18001	2.78305	4.44953	2.26952	0.603039			0.356054	0.342415		80.0106	2.23979	2.33285	2.40697	2.6472	2.50184	2.39851	1.87669	1.30804
																						86.4855	0.218219	-0.952878	-2.1724					80.5106	2.17891	2.8041	4.49459	2.31568	0.625187			0.412579	0.351761		80.5106	2.23176	2.35655	2.37566	2.65816	2.53566	2.40417	1.85894	1.29985
																						86.9855	0.216161	-0.941136	-2.16647					81.0106	2.20582	2.81164	4.38355	2.17773	0.60582			0.38159	0.350949		81.0106	2.22623	2.36841	2.36006	2.65709	2.7746	2.39638	1.8657	1.33801
																						87.4854	0.203683	-0.977196	-2.20196					81.5106	2.17312	2.77652	4.3913	2.21818	0.6034			0.35577	0.351894		81.5106	2.22423	2.34199	2.35206	2.67182	2.51065	2.378	1.88437	1.28174
																						87.9854	0.217581	-0.967393	-2.17146					82.0106	2.19723	2.82636	4.54585	2.34862	0.629136			0.387205	0.354953		82.0106	2.20134	2.3456	2.33766	2.62007	2.81839	2.39209	1.84605	1.31472
																						88.4855	0.211244	-0.98222	-2.16283					82.5106	2.16614	2.78398	4.44739	2.28125	0.61784			0.413698	0.349915		82.5106	2.1873	2.36206	2.33875	2.64457	2.5447	2.38747	1.87414	1.28341
																						88.9855	0.205154	-0.988179	-2.17667					83.0106	2.15108	2.77639	4.40806	2.25697	0.62531			0.405302	0.352434		83.0106	2.19078	2.35252	2.33546	2.61346	2.47662	2.37169	1.85486	1.28338
																						89.4855	0.210666	-0.984715	-2.16448					83.5106	2.14488	2.78656	4.35058	2.2057	0.64168			0.363243	0.369585		83.5106	2.17374	2.34608	2.31899	2.60231	2.48332	2.36008	1.8403	1.26774
																						89.9854	0.201131	-1.00596	-2.16126					84.0106	2.14198	2.77761	4.31166	2.16967	0.635631			0.355317	0.353893		84.0106	2.15197	2.35609	2.28713	2.63065	2.48513	2.3813	1.82927	1.28377
																						90.4854	0.177502	-0.997586	-2.17327					84.5106	2.13572	2.78874	4.41939	2.28367	0.653026			0.360674	0.359424		84.5106	2.16238	2.3461	2.2871	2.5859	2.48272	2.36748	1.80176	1.30179
																						90.9855	0.190269	-1.00835	-2.17546					85.0106	2.12125	2.74225	4.5054	2.38415	0.620992			0.403421	0.344654		85.0106	2.14259	2.29516	2.27662	2.58864	2.45007	2.35473	1.80821	1.27924
																						91.4854	0.190983	-1.01168	-2.18275					85.5056	2.12768	2.76688	4.39682	2.26915	0.6392			0.374089	0.348422		85.5056	2.12946	2.35042	2.26449	2.60849	2.46484	2.36178	1.81822	1.25554
																						91.9854	0.187309	-1.0248	-2.18582					86.0106	2.11842	2.74493	4.47743	2.35902	0.626511			0.388658	0.33887		86.0106	2.09307	2.32259	2.2649	2.57168	2.44171	2.37337	1.82429	1.2767
																						92.4854	0.183354	-1.01952	-2.18279					86.5106	2.11754	2.76445	4.29426	2.17672	0.646917			0.393079	0.34407		86.5106	2.11525	2.32224	2.25316	2.55144	2.45909	2.36402	1.8082	1.2762
																						92.9855	0.182376	-1.02561	-2.19653					87.0106	2.11283	2.7163	4.281	2.16817	0.603473			0.381729	0.337447		87.0106	2.08773	2.33597	2.26317	2.54528	2.4333	2.36175	1.83582	1.28343
																						93.4855	0.163314	-1.03996	-2.1724					87.5106	2.09734	2.74773	4.35256	2.25522	0.650387			0.3714	0.35766		87.5106	2.07593	2.30509	2.24877	2.55269	2.42403	2.33353	1.78977	1.23511
																						93.9855	0.168069	-1.0493	-2.18443					88.0106	2.10725	2.71387	4.3856	2.27835	0.606618			0.390726	0.339378		88.0106	2.0437	2.39546	2.22258	2.53685	2.45663	2.34905	1.78382	1.25047
																						94.4855	0.171046	-1.04853	-2.18485					88.5106	2.0984	2.72177	4.18952	2.09112	0.623378			0.37063	0.346139		88.5106	2.05446	2.2852	2.22824	2.53511	2.43395	2.35171	1.82055	1.25285
																						94.9854	0.172619	-1.04574	-2.18035					89.0107	2.09727	2.69026	4.35153	2.25427	0.592997			0.3765	0.336327		89.0107	2.04567	2.33335	2.22275	2.53481	2.44467	2.35253	1.7829	1.24521
																						95.4855	0.159214	-1.052	-2.17719					89.5106	2.09352	2.68199	4.2619	2.16839	0.588473			0.364528	0.331607		89.5106	2.03921	2.31751	2.20515	2.53282	2.39789	2.34985	1.80157	1.25514
																						95.9855	0.152886	-1.07212	-2.16573					90.0106	2.08643	2.70009	4.16467	2.07824	0.613661			0.348647	0.334283		90.0106	2.03835	2.3068	2.21619	2.53286	2.40433	2.34867	1.77881	1.22993
																						96.4854	0.143563	-1.06299	-2.14901					90.5106	2.08574	2.67926	4.32824	2.2425	0.593515			0.39799	0.325736		90.5106	2.01917	2.30038	2.1973	2.51773	2.4248	2.3392	1.76214	1.25932
																						96.9854	0.135891	-1.06688	-2.16882					91.0107	2.07857	2.70588	4.25157	2.173	0.627309			0.370664	0.340633		91.0107	1.99812	2.30136	2.1855	2.48542	2.40817	2.34637	1.77744	1.26383
																						97.4854	0.142849	-1.09591	-2.17912					91.5106	2.07414	2.68905	4.25411	2.17997	0.614906			0.374465	0.340912		91.5106	1.98006	2.30112	2.1837	2.48324	2.41301	2.32697	1.75973	1.25813
																						97.9855	0.147527	-1.07121	-2.15995					92.0106	2.07462	2.67878	4.29397	2.21935	0.604158			0.402209	0.34225		92.0106	1.96385	2.28104	2.17207	2.47415	2.57108	2.32677	1.74298	1.2311
																						98.4854	0.118845	-1.09986	-2.19126					92.5106	2.06671	2.66968	4.19981	2.1331	0.602971			0.378741	0.335747		92.5106	1.98608	2.26161	2.16799	2.49511	2.4232	2.34014	1.74575	1.23838
																						98.9854	0.119807	-1.09704	-2.15531					93.0106	2.06322	2.66739	4.16266	2.09944	0.604178			0.350391	0.339162		93.0106	1.99199	2.26181	2.16128	2.49116	2.37868	2.32928	1.75691	1.24465
																						99.4855	0.128363	-1.08988	-2.17213					93.5106	2.06829	2.63279	4.34718	2.27889	0.564495			0.392139	0.330722		93.5106	1.97677	2.27748	2.16072	2.48581	2.40426	2.32613	1.76649	1.25896
																						99.9854	0.12451	-1.1121	-2.16806					94.0106	2.05372	2.6202	4.20713	2.15341	0.566476			0.38995	0.324141		94.0106	1.97436	2.24697	2.13197	2.49779	2.39307	2.29781	1.74817	1.25474
																						100.485	0.106019	-1.12497	-2.14877					94.5106	2.05421	2.6798	4.1988	2.14458	0.625588			0.381483	0.339536		94.5106	1.93923	2.25047	2.1433	2.50785	2.38957	2.31683	1.73791	1.26145
																						100.985	0.111275	-1.11043	-2.18001					95.0106	2.07574	2.62578	4.33464	2.2589	0.550043			0.43252	0.328488		95.0106	1.93696	2.2299	2.11832	2.47908	2.67494	2.31446	1.75442	1.25243
																						101.485	0.107524	-1.12744	-2.19924					95.5106	2.03956	2.63689	4.07269	2.03313	0.597333			0.349717	0.325156		95.5106	1.91485	2.22643	2.10868	2.51706	2.38419	2.29854	1.72438	1.24123
																						101.985	0.110569	-1.14034	-2.16617					96.0106	2.03313	2.58939	4.16876	2.13563	0.556262			0.38934	0.308134		96.0106	1.93579	2.21536	2.09592	2.47071	2.37172	2.28259	1.75609	1.22642
																						102.486	0.10931	-1.14445	-2.17464					96.5106	2.02938	2.63991	4.11785	2.08847	0.610531			0.390642	0.334698		96.5106	1.91637	2.24268	2.0886	2.45815	2.4042	2.30207	1.72188	1.2344
																						102.985	0.0910313	-1.14726	-2.19796					97.0106	2.02948	2.66526	4.25176	2.22228	0.63578			0.381781	0.332643		97.0106	1.88932	2.21749	2.07977	2.48032	2.36928	2.30926	1.72529	1.22645
																						103.485	0.102421	-1.1562	-2.19181					97.5106	2.02785	2.65111	4.12187	2.09402	0.623258			0.364846	0.341219		97.5106	1.91736	2.21805	2.08768	2.48467	2.34313	2.32194	1.72181	1.1968
																						103.985	0.114695	-1.1633	-2.16832					98.0106	2.02022	2.62337	4.14725	2.12703	0.603148			0.389463	0.333436		98.0106	1.90338	2.18831	2.06587	2.47662	2.36106	2.30602	1.71414	1.22781
																						104.485	0.087025	-1.15856	-2.19182					98.5107	2.01807	2.62611	4.20929	2.19122	0.608038			0.370417	0.330364		98.5107	1.89962	2.12561	2.05151	2.49767	2.38416	2.30053	1.71574	1.23346
																						104.985	0.0845158	-1.16925	-2.19392					99.0106	2.01212	2.60197	4.16099	2.14887	0.58985			0.365947	0.315966		99.0106	1.87703	2.17148	2.04705	2.45769	2.35113	2.29932	1.69887	1.22351
																						105.485	0.0704216	-1.17645	-2.15593					99.5107	2.00637	2.57451	4.14013	2.13376	0.568142			0.377516	0.315718		99.5107	1.86408	2.20788	2.06333	2.44043	2.35207	2.26894	1.69861	1.19628
																						105.985	0.0822702	-1.17305	-2.16133					100.011	2.00496	2.6007	4.04069	2.03573	0.595743			0.382035	0.325551		100.011	1.85547	2.18497	2.03505	2.46821	2.34179	2.29721	1.6825	1.21509
																						106.486	0.0655478	-1.19315	-2.17958					100.511	2.0017	2.58012	4.12326	2.12156	0.578422			0.378714	0.322409		100.511	1.85498	2.15444	2.02979	2.46142	2.32146	2.26324	1.73596	1.23304
																						106.985	0.0835121	-1.2034	-2.17239					101.011	1.98955	2.57977	4.11366	2.12411	0.590222			0.370036	0.324897		101.011	1.83637	2.13452	2.04516	2.43975	2.2969	2.29903	1.70444	1.19463
																						107.485	0.0820661	-1.20604	-2.17642					101.511	1.99035	2.5819	4.07293	2.08259	0.591546			0.420219	0.327457		101.511	1.84819	2.13421	2.02059	2.42704	2.30797	2.30978	1.69329	1.18633
																						107.985	0.0669002	-1.19747	-2.18056					102.011	2.01128	2.63264	4.01697	2.00569	0.621368			0.378674	0.346648		102.011	1.8428	2.14867	1.99305	2.42038	2.56444	2.27362	1.69031	1.19894
																						108.48	0.0683462	-1.20986	-2.19541					102.511	1.98135	2.55192	3.9697	1.98835	0.570563			0.355252	0.310749		102.511	1.81028	2.13288	2.01625	2.43493	2.31772	2.27616	1.68014	1.18316
																						108.985	0.0608015	-1.22623	-2.16522					103.011	1.97943	2.56645	3.92764	1.9482	0.587015			0.34938	0.324972		103.011	1.80827	2.14235	2.00546	2.41327	2.31021	2.26835	1.69828	1.16586
																						109.485	0.0443767	-1.21529	-2.17909					103.511	1.97011	2.54955	4.15749	2.18738	0.57944			0.413634	0.316525		103.511	1.80241	2.13593	1.99022	2.39796	2.32111	2.26399	1.68023	1.15789
																						109.985	0.0564975	-1.23301	-2.17031					104.011	1.96412	2.52384	4.0838	2.11968	0.559724			0.365679	0.317605		104.011	1.78811	2.09742	1.99249	2.37149	2.28595	2.27665	1.67649	1.16315
																						110.485	0.0472177	-1.22849	-2.17633					104.511	1.96243	2.54853	4.01221	2.04977	0.586096			0.431673	0.319193		104.511	1.79115	2.11494	1.98668	2.40018	2.26842	2.29061	1.65759	1.17646
																						110.985	0.0271609	-1.23184	-2.17198					105.011	1.95574	2.53769	3.97208	2.01634	0.581945			0.391398	0.320656		105.011	1.78089	2.12703	1.98166	2.40583	2.27361	2.25205	1.64902	1.12988
																						111.485	0.040413	-1.25273	-2.177					105.511	1.9555	2.54877	3.99059	2.03508	0.593264			0.352211	0.347547		105.511	1.77352	2.12112	1.98427	2.39533	2.26971	2.24415	1.65178	1.15731
																						111.985	0.0364833	-1.24444	-2.18621					106.011	1.94868	2.53414	4.09809	2.14941	0.585456			0.380884	0.322289		106.011	1.74683	2.12258	1.95567	2.3658	2.27055	2.26291	1.67959	1.13114
																						112.485	0.0318051	-1.23954	-2.16992					106.511	1.95594	2.5434	3.99047	2.03453	0.587454			0.352583	0.335012		106.511	1.76824	2.10309	1.95091	2.40393	2.25957	2.25661	1.68438	1.15036
																						112.985	0.0290151	-1.25008	-2.15147					107.011	1.95269	2.49953	4.1193	2.16661	0.546833			0.398326	0.307188		107.011	1.76824	2.10286	1.94836	2.40277	2.26168	2.23639	1.6725	1.16602
																						113.485	0.0267781	-1.2493	-2.18365					107.511	1.95189	2.51564	3.92276	1.97087	0.563745			0.35539	0.326791		107.511	1.76824	2.08703	1.93876	2.39349	2.23955	2.25946	1.66781	1.20415
																						113.986	0.0148869	-1.26369	-2.17693					108.011	1.94409	2.52141	4.01021	2.06612	0.577325			0.367521	0.320238		108.011	1.76824	2.09862	1.94215	2.38098	2.26191	2.25258	1.64239	1.13438
																						114.485	0.0297296	-1.26023	-2.18785					108.511	1.94891	2.49155	4.04414	2.09523	0.542644			0.35663	0.318604		108.511	1.76824	2.08145	1.93717	2.40049	2.25606	2.26005	1.67102	1.12112
																						114.985	0.0236309	-1.27818	-2.2049					109.012	1.93659	2.49941	4.047	2.11041	0.562818			0.374428	0.311043		109.012	1.76824	2.06376	1.94227	2.38653	2.23444	2.24965	1.63715	1.1336
																						115.485	0.0221424	-1.26899	-2.2039					109.511	1.93494	2.51669	4.04453	2.10959	0.581752			0.385726	0.3323		109.511	1.76824	2.0945	1.93594	2.37143	2.24961	2.24398	1.61381	1.13522
																						115.986	0.0103278	-1.28713	-2.19426					110.011	1.9316	2.47908	4.14155	2.20995	0.547477			0.399038	0.318858		110.011	1.76824	2.0682	1.91456	2.3666	2.22188	2.22761	1.64592	1.11604
																						116.486	0.00319139	-1.29346	-2.18023					110.511	1.9492	2.49552	3.90717	1.95796	0.546315			0.386682	0.315051		110.511		2.05389	1.91885	2.35227	2.24081	2.25569	1.63017	1.12779
																						116.985	0.00511371	-1.28667	-2.19594					111.011	1.93952	2.48931	3.97727	2.03775	0.549782			0.376955	0.324104		111.011		2.01929	1.90614	2.33894	2.23494	2.23359	1.6337	1.11992
																						117.485	-0.00782368	-1.30618	-2.18893					111.511	1.93087	2.47845	3.93592	2.00505	0.547578			0.382479	0.323991		111.511		2.01696	1.93238	2.30606	2.21939	2.23032	1.62253	1.11859
																						117.985	0.00957928	-1.29478	-2.18406					112.011	1.93155	2.47848	3.96581	2.03426	0.546926			0.403964	0.310579		112.011		2.02845	1.90704	2.29859	2.21974	2.23273	1.63333	1.11285
																						118.486	-0.00886139	-1.29173	-2.18569					112.511	1.91653	2.44538	4.09607	2.17954	0.528847			0.431882	0.311373		112.511			1.91341	2.27929	2.23083	2.22721	1.63849	1.12693
																						118.986	-0.00586733	-1.3086	-2.16838					113.011	1.91094	2.44871	3.99496	2.08402	0.537769			0.409606	0.325942		113.011			1.91052	2.25937	2.22094	2.2142	1.61428	1.11891
																						119.485	0.00562407	-1.29588	-2.14856					113.511	1.90169	2.45171	3.85388	1.95219	0.550019			0.393269	0.324326		113.511			1.90495	2.25922	2.20561	2.21573	1.61091	1.1003
																						119.985	-0.00594389	-1.32839	-2.17174					114.011	1.90203	2.46273	3.922	2.01997	0.560702			0.382055	0.315317		114.011			1.88505	2.21893	2.2325	2.22452	1.62794	1.11797
																						120.486	-0.00660734	-1.30499	-2.19686					114.511	1.89984	2.45015	3.92811	2.02827	0.550305			0.40084	0.3283		114.511			1.9071	2.21306	2.19232	2.22851	1.61186	1.12431
																						120.985	-0.0209822	-4.89399	-2.16906					115.011	1.88473	2.44427	3.83858	1.95386	0.559542			0.370353	0.323425		115.011			1.87508	2.19986	2.18035	2.22073	1.60376	1.1002
																						121.485	-0.0285779	-4.89399	-2.19405					115.511	1.89249	2.44101	3.96531	2.07282	0.548522			0.414461	0.334012		115.511			1.87532	2.20417	2.19107	2.22199	1.60547	1.11053
																							-0.0227599	-4.89399	-2.17561					116.011	1.91334	2.43311	3.83254	1.9192	0.51977			0.391764	0.315744		116.011			1.85329	2.16919	2.17684	2.22596	1.81507	1.12962
																							-0.0245802	-4.89399	-2.16342					116.511	1.88172	2.43692	3.95062	2.06891	0.555203			0.402806	0.31799		116.511			1.86238	2.19629	2.15737	2.21451	1.58814	1.08951
																							-0.0548355	-4.89399	-2.19888					117.011	1.88454	2.43312	3.92757	2.04303	0.548585			0.370136	0.329626		117.011			1.86984	2.25459	2.18286	2.20451	1.59522	1.06933
																							-0.0400183	-4.89399	-2.17506					117.926	1.89045	2.4293	3.81291	1.92246	0.538853			0.38693	0.324366		117.926			1.86201	2.31337	2.15635	2.21184	1.60024	1.105
																							-0.0399247	-4.89399	-2.19915					118.275	1.89414	2.39591	4.08464	2.19051	0.501769			0.400127	0.325015		118.275				2.27657	2.17684	2.192	1.5958	1.08715
																							-0.0416599	-4.89399	-2.19259					118.778	1.89775	2.40455	4.08903	2.19128	0.506801			0.411236	0.332159		118.778				2.3031	2.16046	2.23234	1.58536	1.10806
																							-0.066548	-4.89399	-2.19413					119.28	1.88777	2.41447	4.04316	2.15539	0.526702			0.387957	0.340648		119.28				2.28866	2.14227	2.21607	1.5867	1.09015
																							-0.0585015	-4.89399	-2.18199					119.783	1.87891	2.39804	3.99229	2.11337	0.51913			0.377219	0.321766		119.783				2.29418	2.14136	2.1959	1.58303	1.06238
																							-0.0573277	-4.89399	-2.1998					120.285	1.88475	2.40618	3.90416	2.01941	0.521429			0.364589	0.336407		120.285				2.32147	2.14171	2.17637	1.60339	1.05993
																							-0.0662333	-4.89399	-2.1897					120.789	1.91408	2.43688	4.05772	2.14364	0.522804			0.447442	0.352525		120.789				2.30039	2.3496	2.2004	1.59724	1.07399
																							-0.0704267	-4.89399	-2.19545					121.291	1.90002	2.37931	3.99822	2.0982	0.47929			0.374334	0.331353		121.291				2.3267	2.18833	2.22173	1.60684	1.06219
																							-0.0636986	-4.89399	-2.18677					121.794	1.88396	2.3815	4.07691	2.19295	0.497542			0.439678	0.329035		121.794				2.33648	2.11898	2.18816	1.57628	1.08281
																							-0.0588502	-4.89399	-2.18576					122.296	1.93268	2.40915	4.07479	2.1421	0.476467			0.413053	0.35822		122.296				2.31416	2.13346	2.20302		1.05994
																							-0.065068	-4.89399	-2.18578					122.799	1.9282	2.54306	3.8999	1.97171	0.614865			0.3864	0.322391		122.799				2.32336	2.1219	2.16296		1.08785
																							-0.0856352	-4.89399	-2.18361					123.302	1.9753	2.54471	3.94038	1.96508	0.569416			0.382821	0.343518		123.302				2.33571	2.34976	2.19775		1.09712
																							-0.0629926	-4.89399	-2.19014					123.807	1.94369	2.51364	3.90584	1.96215	0.569947			0.368561	0.321524		123.807				2.34727	2.12577	2.17979		1.11519
																							-0.0674752	-4.89399	-2.19271					124.308	1.93371	2.48846	3.95379	2.02008	0.554751			0.394391	0.30665		124.308				2.32911	2.11449	2.17537		1.11249
																							-0.0728594	-4.89399	-2.18757					124.812	1.92403	2.50281	3.93668	2.01265	0.578781			0.394085	0.322801		124.812				2.32981	2.08857	2.15034		1.11213
																							-0.0835172	-4.89399	-2.18046					125.313	1.91305	2.54989	3.91921	2.00616	0.636846			0.377914	0.344997		125.313				2.30707	2.08478	2.16603		1.08094
																							-0.0883315	-4.89399	-2.17527					125.817	1.91496	2.52533	3.91125	1.99629	0.610375			0.392967	0.330854		125.817				2.34651	2.08483	2.16973		1.06059
																							-0.0802084	-4.89399	-2.17873					126.319	1.9227	2.50549	3.77247	1.84977	0.582792			0.422325	0.337716		126.319				2.35365	2.09684	2.15199		1.0887
																							-0.0975093	-4.89399	-2.18591					126.823	1.91615	2.51911	4.00107	2.08492	0.602959			0.40315	0.323804		126.823				2.33768	2.09818	2.15808		1.07984
																							-0.0869621	-4.89399	-2.19151					127.325	1.82416	2.506	3.91542	2.09126	0.681845			0.416004	0.384466		127.325				2.329				1.1688
																							-0.0923293	-4.89399	-2.18999					127.829	1.80514	2.48139	3.97082	2.16569	0.67626			0.447623	0.387566		127.829				2.30365				1.07237
																							-0.11111	-4.89399	-2.17955					128.33	1.80608	2.49666	3.8434	2.03732	0.690575			0.446142	0.401351		128.33				2.33741				1.06602
																							-0.101847	-4.89399	-2.18263					128.834	1.81737	2.46798	3.84605	2.02868	0.650611			0.439259	0.38167		128.834				2.33976				1.09114
																							-0.10627	-4.89399	-2.18867					129.336	1.799	2.47213	3.83421	2.03521	0.673129			0.437209	0.387683		129.336				2.32124				1.06859
																							-0.117251		-2.18446					129.84	1.78761	2.47725	4.03675	2.24915	0.689646			0.445909	0.397133		129.84				2.31011				1.0377
																							-0.121759							130.341	1.8035	2.44126	3.86952	2.06602	0.637757			0.410755	0.378739		130.341				2.33916				1.0778
																														130.846	1.79401	2.46442	3.72559	1.93158	0.670403			0.399215	0.395963		130.846				2.33278				1.06657
																														131.349	1.79716	2.45096	3.87539	2.07823	0.653793			0.44588	0.390825		131.349				2.34204				1.06261
																														131.853	1.79121	2.46907	3.81235	2.02115	0.677863			0.428242	0.392963		131.853				2.31889				1.0581
																														132.355	1.78726	2.44938	3.81725	2.02999	0.662128			0.43173	0.383311		132.355				2.30134				1.07606
																														132.855	1.78649	2.43733	3.82585	2.03937	0.650839			0.436028	0.389049		132.855				2.3072				1.07446
																														133.357	1.77962	2.46376	3.72013	1.94051	0.684137			0.409616	0.393837		133.357				2.30778				1.06035
																														133.86	1.77871	2.42819	3.575	1.79629	0.649476			0.408714	0.394719		133.86				2.28802				1.04938
																																													2.2894				1.05904
																																													2.26985				1.03983
																																													2.30513				1.03516
																																													2.30463				1.0402
																																													2.27417				1.04631
																																													2.27485				1.06502
																																													2.24011				1.03783
																																													2.26546				1.05341
																																													2.26052				1.13376
																																													2.24406
																																													2.22418
																																													2.26087
																																													2.23873
																																													2.21834
																																													2.25288
																																													2.24848
																																													2.26388
																																													2.23829
																																													2.23226
																																													2.22599






[truncated: 96 more columns]
