# Supplementary material for: Mechanically stimulated ATP release from murine bone cells is regulated by a balance of injury and repair
Source: eLife. 2018 Oct 16;7:e37812. doi: 10.7554/eLife.37812 (PMC6205812; doi:10.7554/eLife.37812)
Supplement: Figure 5—source data 1. [file elife-37812-fig5-data1.xlsx]

## Sheet: Fig5
														Panel E							Panel F
															Basal LFTR-Dex uptake (% of all cells)						Dye Uptake *% non-loaded)
																							600 microstrain		1200 microstrain
																calvaria	proximal tibia	mid shaft				basal	pre	post	pre	post
															mean	2.27	6.27301	7.50424			mouse 1	1.00312	1.20302	1.62092
															std	0.738749	1.80036	3.16872			mouse 2	0.951432	1.13508	0.708333
															error	32.544	28.7001	42.2257			mouse 3	1.09109	1.50602	0.381356
															n	5	20	19			mouse 4	1.03598	0.925926	0.683168
															sem	0.330379	0.402573	0.726954			mouse 5	0.938429	1.32331	1.15423
															p value (vs. calvaria)		0.00243935	0.00154777			mouse 6	0.998859			1.2549	0.444444
																					mouse 7	0.869514			0.918819	0.465839
																					mouse 8	1.04313			1.18868	0.74026
																					mouse 9	1.11725			1.66667	0.575758
																					mouse 10	0.983045			1.25	1.1069
																					mean	1.00319	1.21867	0.9096	1.25581	0.666639
																					std	0.0734645	0.215901	0.483899	0.267819	0.272579
																					error	7.32312	17.7161	53.1991	21.3263	40.8885
																					n	10	11	12	13	14
																					sem	0.0232315	0.0650966	0.13969	0.0742795	0.0728498
																					p value (vs. basal)		0.0118042	0.545551	0.0131137	0.00234767
																					p value (pre vs post)			0.228414		0.00872594
																					ANOVA
																					SUMMARY
																					Groups	Count	Sum	Average	Variance
																					basal	10	10.0319	1.00319	0.00539703
																					pre	5	6.09336	1.21867	0.0466133
																					post	5	4.548	0.9096	0.234158
																					pre	5	6.27907	1.25581	0.0717268
																					post	5	3.3332	0.666639	0.0742994
																					ANOVA
																					Source of Variation	SS	df	MS	F	P-value	F crit
																					Between Groups	1.16018	4	0.290045	4.1299	0.0105272	2.75871
																					Within Groups	1.75576	25	0.0702306
																					Total	2.91594	29
