# Supplementary material for: Mechanically stimulated ATP release from murine bone cells is regulated by a balance of injury and repair
Source: eLife. 2018 Oct 16;7:e37812. doi: 10.7554/eLife.37812 (PMC6205812; doi:10.7554/eLife.37812)
Supplement: Figure 6—source data 1. [file elife-37812-fig6-data1.xlsx]

## Sheet: Fig6
																					Panel A																				Panel B
																						Medium Displacement (10x100uL Displacement)
																						control		PMA		Bis
																					trial	0s	300s	0s	300s	0s	300s
																					1	0.279899	0	0.110668	0.0337452	0.379899	0.264514
																					2	0.594185		0.0103338	0	0.594185	0.529899
																					3	0.254899	0.0132324	0.079899	0	0.0972903	0.370465
																					4	0.174017	0	0.0132324	0.129899	0.152626	0.276125
																					5	0.146566	0.0617172	0	0.0703752	0.00489904	0.234738
																					6	0.146566	0	0	0	0.104899	0.146566
																						Medium Displacement (10x100uL Displacement)
																						control		PMA		Bis
																						0s	300s	0s	300s	0s	300s
																					mean	0.266022	0.0149899	0.0356889	0.0390032	0.2223	0.303718															Control	caFree	U73				Control	caFree
																					std	0.170301	0.0267424	0.0474784	0.0526073	0.221207	0.132187														1	3	3	1			no leakage	9	1
																					error	64.0176	178.403	133.034	134.879	99.5086	43.5228														2	1	3	1			leakage	2	10
																					n	6	5	6	6	6	6														3	3	3	1			sum	11	11
																					sem	0.069525	0.0119596	0.019383	0.0214769	0.0903076	0.0539649														4	1	3	1
																					p value: 0 vs 300		0.0102529		0.911059		0.456887														5	1	3	3
																					p value: ctrl vs treatment			0.00066613	0.0841912	0.181143	0.0125386														6	1	3	3				Control	caFree
																																									7	1	3	1			no leakage	0.818182	0.0909091
																																									8	1	3	1			leakage	0.181818	0.909091
																																									9	1	1	3
																																									10	1	3
																						ctrl		caFree		U73															11	1	3
																						0sec	300sec	0sec	300sec	0sec	300sec																				Pdif		-0.727273
																						0.37007	0.0410101	0.142857	0.166667	0	0.0957341																				Po		0.0495868
																						0.285455	0.0521212	0.485714	0.269231	0.167163	0.524306																				SEMo		0.0925673
																						0.285455	0.0330736	0.5	0.25	0.0243056	0.420139																				z		-7.85669
																						0.243519	0.0724111	0.619048	0.222222	0.457639	0.500496																				p		1.97213e-15
																						0.318788	0.0521212	0.5	0.367347	0.143353	0.171364																				sem	0.116291	0.0866784
																						0.254685		0.537037	0.583333	0.324306	0.134062
																						0.185455		0.380952		0.266241
																						0.103102		0.333333		0.524306
																						ctrl		caFree		U73
																						0sec	300sec	0sec	300sec	0sec	300sec
																					mean	0.255816	0.0501474	0.45223	0.3098	0.238414	0.307683																					ctrl	PMA
																					std	0.082116	0.0148195	0.153567	0.149339	0.190766	0.19514
																					error	32.0996	29.5518	33.9578	48.2051	80.0147	63.4223																				no leakage	38	10
																					n	8	5	8	6	8	6																				leakage	7	1
																					sem	0.0290324	0.00662747	0.0542943	0.0609675	0.067446	0.0796655																				sum	45	11
																					p value: 0 vs 300		0.000198769		0.138185		0.518042
																					p value: ctrl vs treatment			0.0145443	0.00555224	0.816098	0.0171046																					Control	PMA
																																															no leakage	0.844444	0.909091
																																															leakage	0.155556	0.0909091
																																															sum	1	1
																																															Pdif		0.147475
																																															Po		0.00440115
																																															SEMo		0.0222647
																																															z		-6.6237
																																															p		1.75157e-11
[truncated: 12 more columns]
